# Supplementary material for: Discovery of a novel antibiotic, Transitmycin, from Streptomyces sp unveils highly efficient activities against tuberculosis and human immunodeficiency virus
Source: Research Square preprint supplement (doi:10.21203/rs.3.rs-5801746/v1), 2025-01-28
Supplement: Supplementary file 1 [file 04ff5812efa3b997c0a4726b.docx]

**Discovery of a novel antibiotic, Transitmycin, from *Streptomyces* sp unveils highly efficient activities against tuberculosis and human immunodeficiency virus**

Vanaja Kumar*1,4, Balagurunathan Ramasamy2, Mukesh Doble$3,5, Radhakrishnan Manikkam4, Luke Elizabeth Hanna1, K R Uma devi1, Gandarvakottai Senthilkumar Arumugam 3,7, Kannan Damodharan3,7, Suresh Ganesan3, Azger Dusthakeer1, Precilla Lucia1, Shainaba A Saadhali1, Shanthi John2, Poongothai Eswaran2, , Jaleel UCA6, Rakhila M6, Ayisha Safeeda6 and Sathish S6 , Selvakumar Nagamiah1

1National Institute for Research in Tuberculosis, Chennai – 600031, Tamilnadu, India

2Department of Microbiology, Periyar University, Salem – 636011, Tamilnadu, India

3Department of Biotechnology, Indian Institute of Technology, Madras – 600036, Tamilnadu, India

4Centre for Drug Discovery and Development, Sathyabama Institute of Science and Technology

(Deemed to be University), Chennai – 600119, Tamilnadu. India

5 Saveetha Dental College and Hospitals, 62, Poonamallee High Rd, Chennai, 600077, India

6 Open Source Pharma Foundation-National Institute of Advanced Studies Drug Discovery Lab, NIAS, IISc Campus, Bangalore, Karnataka, India

7SSS International Drug Discovery & Development Research Private Limited, Innovation & Entrepreneurship, Sudha & Shankar innovation hub, IIT Madras, Chennai-600036, India

Email: *vanaja_kumar51@yahoo.co.in; $ mukeshdoble.sdc@saveetha.com

**Corresponding Author:**

Dr. Vanaja Kumar

Former Scientist G & Head

Department of Bacteriology

1National Institute for Research in Tuberculosis,

Chennai – 600 031. Tamil Nadu. India

Email: [vanaja_kumar51@yahoo.co.in](mailto:vanaja_kumar51@yahoo.co.in)

**Supplementary Information**

| **zTable/Figure** | **Title** | **Page Number** |
| --- | --- | --- |
| **S-Table 1.** | Phenotypic characteristics of Streptomyces sp. R2 | S10 |
| **S-Table 2.** | Effect of solvents on the extraction of Transitmycin | S11 |
| **Figure S1** | Characteristic microbial strain and its morphological arrangement | S12 |
| **Figure S1a** | (a) TLC of Ethyl acetate extract of Streptomyces sp R2 in UV light (b) Long UV (c) Short UV | S13 |
| **Figure S2.** | Purification of EA extract of Streptomyces sp. R2 by Preparative Thin-Layer Chromatography | S14 |
| **Figure S3.** | Scheme of purification of EA extract of Streptomyces sp. R2 by Column Chromatograph | S15 |
| **Figure S4.** | RP HPLC of the ethyl acetate extract of Streptomyces sp. R2 (Batch II) | S16 |
| **Figure S5.** | Purity of Transitmycin R1, R2, R3 were checked by RP HPLC method | S17 |
| **S-Table 3.** | HPLC Retention time of R1, R2, R3 | S17 |
| **Figure S6.** | UV/Vis Spectrum of R2 in methanol | S18 |
| **Figure S7.** | UV/Vis Spectrum of R3 in methanol | S19 |
| **Figure S8.** | Circular Dichroism Spectrum of Transitmycin (R1) in methanol | S20 |
| **Figure S9.** | Circular Dichroism Spectrum of R2 in methanol | S21 |
| **Figure S10.** | Circular Dichroism Spectrum of R3 in methanol | S22 |
| **Figure S11.** | FT-IR Spectrum of Transitmycin (R1), R2, R3 | S23 |
| **Figure S12.** | FT-IR Spectrum of R2 | S24 |
| **Figure S13.** | FT-IR Spectrum of R3 | S25 |
| **Table S4.** | IR Absorption Frequencies of Functional Groups Present in R1, R2, R3 | S26 |
| **Figure S14.** | 1H-NMR (500 MHz, CDCl3) Spectrum of Transitmycin (R1) | S27 |
| **Figure S15.** | Expansion of 1H-NMR (500 MHz, CDCl3) Spectrum of Transitmycin (R1) | S28 |
| **Figure S16.** | Expansion of 1H-NMR (500 MHz, CDCl3) Spectrum of Transitmycin (R1) | S29 |
| **Figure S17.** | Expansion of 1H-NMR (500 MHz, CDCl3) Spectrum of Transitmycin (R1) | S30 |
| **Figure S18.** | Expansion of 1H-NMR (500 MHz, CDCl3) Spectrum of Transitmycin (R1) | S31 |
| **Figure S19.** | 13C-NMR (125 MHz, CDCl3) Spectrum of Transitmycin (R1) | S32 |
| **Figure S20.** | 13C-NMR (125 MHz, CDCl3) Spectrum of Transitmycin (R1) | S33 |
| **Figure S21.** | 13C-NMR (125 MHz, CDCl3) Spectrum of Transitmycin (R1) | S34 |
| **Figure S22.** | 13C-NMR (125 MHz, CDCl3) Spectrum of Transitmycin (R1) | S35 |
| **Figure S23** | 13C-NMR (125 MHz, CDCl3) Spectrum of Transitmycin (R1) | S36 |
| **Figure S24.** | 13C-NMR (125 MHz, CDCl3) Spectrum of Transitmycin (R1) | S37 |
| **Figure S25.** | 13C-NMR (125 MHz, CDCl3) Spectrum of Transitmycin (R1) | S38 |
| **Figure S26.** | DEPT135 (125 MHz CDCl3) Spectrum of Transitmycin (R1) | S39 |
| **Figure S27.** | COSY (500 MHz) Spectrum of Transitmycin (R1) | S40 |
| **Figure S28.** | DQF-COSY (500 MHz) Spectrum of Transitmycin (R1) | S41 |
| **Figure S29.** | Expansion of DQF-COSY (500 MHz) Spectrum of Transitmycin (R1) | S42 |
| **Figure S30.** | Expansion of DQF-COSY (500 MHz) Spectrum of Transitmycin (R1 | S43 |
| **Figure S31.** | Expansion of DQF-COSY (500 MHz) Spectrum of Transitmycin (R1) | S44 |
| **Figure S32.** | Expansion of DQF-COSY (500 MHz) Spectrum of Transitmycin (R1) | S45 |
| **Figure S33.** | HMBC (500 MHz) Spectrum of Transitmycin (R1) | S46 |
| **Figure S34.** | Expansion of HMBC (500 MHz, CDCl3) Spectrum of Transitmycin (R1) | S47 |
| **Figure S35.** | Expansion of HMBC (500 MHz, CDCl3) Spectrum of Transitmycin (R1) | S48 |
| **Figure S36.** | Expansion of HMBC (500 MHz, CDCl3) Spectrum of Transitmycin (R1 | S49 |
| **Figure S37.** | Expansion of HMBC (500 MHz, CDCl3) Spectrum of Transitmycin (R1) | S50 |
| **Figure S38.** | Expansion of HMBC (500 MHz, CDCl3) Spectrum of Transitmycin (R1) | S51 |
| **Figure S39.** | Expansion of HMBC (500 MHz, CDCl3) Spectrum of Transitmycin (R1) | S52 |
| **Figure S40.** | Expansion of HMBC (500 MHz, CDCl3) Spectrum of Transitmycin (R1) | S53 |
| **Figure S41.** | HSQC (500 MHz, CDCl3) Spectrum of Transitmycin (R1) | S54 |
| **Figure S42.** | TOCSY (500 MHz) Spectrum of Transitmycin (R1) | S55 |
| **Figure S43.** | Expansion of TOCSY (500 MHz, CDCl3) Spectrum of Transitmycin (R1) | S56 |
| **Figure S44.** | Expansion of TOCSY (500 MHz, CDCl3) Spectrum of Transitmycin (R1) | S57 |
| **Figure S45.** | Expansion of TOCSY (500 MHz, CDCl3) Spectrum of Transitmycin (R1) | S58 |
| **Figure S46.** | NOESY (500 MHz, CDCl­3) Spectrum of Transitmycin (R1) | S59 |
| **Figure S47.** | Expansion of NOESY (500 MHz, CDCl­3) Spectrum of Transitmycin (R1) | S60 |
| **Figure S48.** | Expansion of NOESY (500 MHz, CDCl­3) Spectrum of Transitmycin (R1) | S61 |
| **Figure S49.** | Expansion of NOESY (500 MHz, CDCl­3) Spectrum of Transitmycin (R1) | S62 |
| **Figure S50.** | Expansion of NOESY (500 MHz, CDCl­3) Spectrum of Transitmycin (R1) | S63 |
| **Figure S51.** | Expansion of NOESY (500 MHz, CDCl­3) Spectrum of Transitmycin (R1) | S64 |
| **Figure S52.** | ROESY (500 MHz) Spectrum of Transitmycin (R1) | S65 |
| **Table S5.** | NMR data of Transitmycin (R1) in CDCl3 (1H: 500 MHz 13C: 125 MHz) | S66-72 |
| **Figure S53.** | 1H-NMR (500 MHz, CDCl3) Spectrum of Compound R2 | S73 |
| **Figure S54.** | 13C NMR (125 MHz, CDCl3) Spectrum of Compound R 2 | S74 |
| **Figure S55.** | DEPT135&90 (125 MHz CDCl3) Spectrum of Compound R2 | S75 |
| **Figure S56.** | Expansion of DEPT135 & 90 (125 MHz, CDCl3) Spectrum of Compound R2 | S76 |
| **Figure S57.** | Expansion of DEPT135 & 90 (125 MHz, CDCl3) Spectrum of Compound R2 | S77 |
| **Figure S58.** | COSY (500 MHz) Spectrum of Compound R2 | S78 |
| **Figure S59.** | DQF-COSY (500 MHz) Spectrum of Compound R2 | S79 |
| **Figure S60.** | HMBC (500 MHz) Spectrum Compound of R2 | S80 |
| **Figure S61.** | HSQC (500 MHz) Spectrum of Compound R2 | S81 |
| **Figure S62.** | TOCSY (500 MHz) Spectrum of Compound R2 | S82 |
| **Figure S63.** | NOESY (500 MHz) Spectrum of Compound R2 | S83 |
| **Figure S64.** | 1H-NMR (500 MHz, CDCl3) Spectrum of Compound R3 | S84 |
| **Figure S65.** | DQF-COSY (500 MHz) Spectrum of Compound R3 | S85 |
| **Figure S66.** | HMBC (500 MHz) Spectrum of Compound R3 | S86 |
| **Figure S67.** | HSQC (500 MHz) Spectrum of Compound R3 | S87 |
| **Figure S68.** | TOCSY (500 MHz) Spectrum of Compound R3 | S88 |
| **Figure S69.** | NOESY (500 MHz) Spectrum of Compound R3 | S89 |
| **Figure S70.** | MALDI-TOF MS Spectrum of Transitmycin (R1) (Molecular ion peak) (positive mode) | S90 |
| **Figure S71.** | Expansion of MALDI-TOF MS Spectrum of Transitmycin (R1) (Molecular ion peak) | S91 |
| **Figure S72.** | Expansion of MALDI-TOF MS Spectrum of Transitmycin (R1) (Molecular ion peak | S92 |
| **Figure S73.** | MALDI-TOF MS Spectrum of R2 (Molecular ion peak) (positive mode) | S93 |
| **Figure S74.** | Expansion of MALDI-TOF MS Spectrum of R2 (Molecular ion peak) (positive mode) | S94 |
| **Figure S75.** | Expansion of MALDI-TOF MS Spectrum of R2 (Molecular ion peak) (Negative mode) | S95 |
| **Figure S76.** | MALDI-TOF MS Spectrum of R3 (Molecular ion peak) (positive mode) | S96 |
| **Figure S77.** | MALDI-TOF MS Spectrum of R3 (Molecular ion peak) (Negative mode) | S97 |
| **Figure S78.** | MALDI-TOF MS Spectrum of Transitmycin (R1) (Positive mode) | S98 |
| **Figure S79.** | MALDI-TOF MS Spectrum of Transitmycin A (Negative mode) | S99 |
| **Table S6.** | MALDI-TOF MS Spectral Fragmentation of Transitmycin (R1) (Positive mode) | S100 |
| **Figure S80.** | MALDI-TOF MS Spectrum of R2 (Positive mode | S101 |
| **Figure S81.** | MALDI-TOF MS Spectrum of R2 (Negative mode) | S102 |
| **Figure S82.** | MALDI-TOF MS Spectrum of R3 (Positive mode) | S103 |
| **Figure S83.** | MALDI-TOF MS Spectrum of R3 (Negative mode) | S104 |
| **Figure S84.** | QTRAP MS/MS Transitmycin (R1) (Molecular ion peak) (Positive mode) | S105 |
| **Figure S85.** | QTRAP MS/MS Transitmycin (R1) (Molecular ion peak [M+H]2+ (Positive mode) | S106 |
| **Figure S86.** | QTRAP MS/MS of Transitmycin (R1) (Molecular ion peak) (Negative mode) | S107 |
| **Figure S87.** | QTRAP MS/MS of R2 (Molecular ion peak) ((Positive mode) | S108 |
| **Figure S88.** | QTRAP MS/MS of R2 [M+H]2+ ion peak (Positive mode) | S109 |
| **Figure S89.** | QTRAP MS/MS of R2 (Molecular ion peak (Positive mode) | S100 |
| **Figure S90.** | QTRAP MS/MS of R3 Molecular ion peak (Positive mode) | S111 |
| **Figure S91.** | QTRAP MS/MS of R3 (Molecular ion peak (Negative mode) | S112 |
| **Figure S92.** | HR-ESI-MS Spectrum of Transitmycin (R1) (Positive mode) | S113 |
| **Figure S93.** | HR-ESI-MS Spectrum of Transitmycin (R1) (Molecular ion Peak) (Positive mode) | S114 |
| **Figure S94.** | HR-ESI-MS Spectrum of R2 (Positive mode) | S115 |
| **Figure S95.** | HR-ESI-MS Spectrum of R2 (Molecular ion Peak) (Positive mode) | S116 |
| **Figure S96.** | HR-ESI-MS Spectrum of R3 (Positive mode) | S117 |
| **Figure S97.** | HR-ESI-MS Spectrum of R3 (Molecular ion Peak) (Positive mode) | S118 |
| **Figure S98.** | LC-ESI-MS Spectrum of Transitmycin (R1) (Molecular ion peak) (Positive mode) | S119 |
| **Figure S99.** | LC-ESI-MS Spectrum of Transitmycin (R1) (Positive mode). | S120 |
| **Figure S100.** | LC-ESI-MS Spectrum of Trasitmycin (R1) (Positive mode) | S121 |
| **Figure S101.** | LC-ESI-MS Spectrum of Trasitmycin (R1) (Positive mode) | S122 |
| **Figure S102.** | LC-ESI-MS Spectrum of R2 (Positive mode) | S123 |
| **Figure S103.** | LC-ESI-MS Spectrum of R2 (Molecular ion) (Positive mode) | S124 |
| **Figure S104.** | LC-ESI-MS Spectrum of R3 (Positive mode). | S125 |
| **Figure S105.** | LC-ESI-MS Spectrum of R3 (Positive mode) | S126 |
| **Figure S106.** | EI-MS Spectrum of Transitmycin (R1) (Positive mode) | S127 |
| **Figure S107.** | EI-MS Spectrum of (R1) (molecular ion peak) (Positive mode) | S128 |
| **Figure S108.** | EI-MS Spectrum of (R2) (Positive mode) | S129 |
| **Figure S109.** | EI-MS Spectrum of (R3) (Positive mode) | S130 |
| **Figure S110.** | CHN analysis data of Transitmycin (R1), R2, R3 | S131 |
| **Figure S111.** | 3200 QTRAP LC/MS/MS Spectrum of Transitmycin (R1) (Negative mode) | S132 |
| **Figure S112.** | 3200 QTRAP LC/MS/MS Spectrum of Transitmycin (R1) (positive mode) | S133 |
| **Figure S113.** | 3200 QTRAP LC/MS/MS Spectrum of Transitmycin (R1) (positive mode) | S134 |
| **Figure S114.** | 3200 QTRAP LC/MS/MS Spectrum of Transitmycin (R1) (positive mode) | S135 |
| **Figure S115.** | 3200 QTRAP LC/MS/MS Spectrum of Transitmycin (R1) (positive mode) | S136 |
| **Figure S115 a, b** | Structural characterisation of Transitmycin (R1) obtained by QTRAP LC-MS/MS | S137 |
| **Table S7a.** | Structural characterisation of Transitmycin (R1) [M+H]+ obtained by QTRAP LCMS/MS | S138 |
| **Table S7b.** | Structural characterisation of Transitmycin (R1) [M+Na]+ obtained by QTRAP LCMS/MS | S139 |
| **Figure S116.** | Hydrolysis of amino acid residue of Transitmycin (R1), R2, R3 | S140 |
| **Figure S117a.** | HPLC analysis of standard L-FDAA-D/L-Valine | S141a |
| **Figure S117b.** | HPLC analysis of standard L-FDAA-D-Valine | S141b |
| **Figure S117c.** | HPLC analysis of standard L-FDAA-L-Valine | S141c |
| **Figure S118 a.** | HPLC analysis of standard L-FDAA-D/L-Proline | S142a |
| **Figure S118 b.** | HPLC analysis of standard L-FDAA-D-Proline | S142b |
| **Figure S118c.** | HPLC analysis of standard L-FDAA-L-Proline | S142c |
| **Figure S119a.** | HPLC analysis of standard L-FDAA-D/L-Threonine | S143a |
| **Figure S119b.** | HPLC analysis of standard L-FDAA-D-Threonine | S143b |
| **Figure S119c.** | HPLC analysis of standard L-FDAA-D-Threonine | S143c |
| **Figure S120a.** | HPLC analysis of standard L-FDAA-D/L-N-Methyl Valine | S144a |
| **Figure S120b.** | HPLC analysis of standard L-FDAA-D-N-Methyl Valine | S144b |
| **Figure S120c.** | HPLC analysis of standard L-FDAA-D-N-Methyl Valine | S144c |
| **Figure S121a.** | HPLC analysis of standard L-FDAA-D-Valine | S145a |
| **Figure S121b.** | HPLC analysis of standard L-FDAA-L-Valine | S145b |
| **Figure S121c.** | HPLC Analysis of L-FDAA Derivatives of acid hydrolysates of Transitmycin (R1) | S143a |
| **Figure 122a.** | HPLC analysis of standard L-FDAA-D-Valine | S143b |
| **Figure S122b.** | HPLC analysis of standard L-FDAA-L-Valine | S143c |
| **Figure S122c.** | HPLC Analysis of L-FDAA Derivatives of acid hydrolysates of R2 | S144a |
| **Figure S123a.** | HPLC analysis of standard L-FDAA-D-Valine | S144b |
| **Figure S123b.** | HPLC analysis of standard L-FDAA-L-Valine | S144c |
| **Figure S123c.** | HPLC Analysis of L-FDAA Derivatives of acid hydrolysates of R3 | S145 |
| **Figure S124.** | HPLC Analysis of L-FDAA Derivatives of acid hydrolysates of R2 | S148 |
| **Figure S125.** | HPLC Analysis of L-FDAA Derivatives of acid hydrolysates of R3 | S149 |
| **Table 8a.** | Analysis of L-FDAA derivates of acid hydrolysate of R2 by HPLC | S150 |
| **Table 8b.** | Analysis of L-FDAA derivatives of acid hydrolysate of R3 by HPLC | S150 |
| **Figure S126.** | ESI- MS Spectrum of Marfey’s Derivatives of Transitmycin (R1) (Positive mode) | S151 |
| **Figure S127.** | ESI- MS Spectrum of Marfey’s Derivatives of Transitmycin (R1) (Positive mode) | S152 |
| **Figure S128.** | LCMS analysis of Standard L-FDAA-D-Proline (Positive mode) | S153 |
| **Figure S129.** | LCMS analysis of Standard L-FDAA-D-Proline (Negative mode) | S154 |
| **Figure S130.** | LCMS analysis of Standard L-FDAA-L-Proline (Positive mode | S155 |
| **Figure S131.** | LCMS analysis of Standard L-FDAA-L-Proline (Negative mode) | S156 |
| **Figure S132.** | LCMS analysis of Standard L-FDAA-D/L-Proline (Positive mode) | S157 |
| **Figure S133.** | LCMS analysis of Standard L-FDAA-D/L-Proline (Negative mode) | S158 |
| **Figure S134.** | LCMS analysis of Standard L-FDAA-D-Valine (Positive mode) | S159 |
| **Figure S135.** | LCMS analysis of Standard L-FDAA-D-Valine (Negative mode) | S160 |
| **Figure S136.** | LCMS analysis of Standard L-FDAA-L-Valine (Positive mode) | S161 |
| **Figure S137.** | LCMS analysis of Standard L-FDAA-L-Valine (Negative mode) | S162 |
| **Figure S138.** | LCMS analysis of Standard L-FDAA-D/L-Valine (Positive mode) | S163 |
| **Figure S139.** | LCMS analysis of Standard L-FDAA-D/L-Valine (Negative mode) | S164 |
| **Figure S140.** | LCMS analysis of Standard L-FDAA-D/L-Valine (Positive mode) | S165 |
| **Figure S141.** | LCMS analysis of Standard L-FDAA-D/L-Valine (Negative mode) | S166 |
| **Figure S142.** | LCMS analysis of Standard L-FDAA-D-Threonine (Positive mode) | S167 |
| **Figure S143.** | LCMS analysis of Standard L-FDAA-D-Threonine (Negative mode) | S168 |
| **Figure S144.** | LCMS analysis of Standard L-FDAA-D/L Threonine (Positive mode) | S169 |
| **Figure S 145.** | LCMS analysis of Standard L-FDAA-D/L Threonine (Negative mode) | S170 |
| **Figure S146.** | LCMS analysis of Standard L-FDAA-D/L N-Methyl valine (Positive mode). | S171 |
| **Figure S147.** | LCMS analysis of Standard L-FDAA-D/L N-Methyl Valine (Positive mode) | S172 |
| **Figure S148.** | LCMS analysis of Standard L-FDAA-L N-Methyl valine (Positive mode) | S173 |
| **Figure S149.** | LCMS analysis of Standard L-FDAA-L- N-Methyl valine (Positive mode) | S174 |
| **Figure S150.** | LCMS analysis of Standard L-FDAA-L N-Methyl Valine (Positive mode) | S175 |
| **Figure S151.** | LCMS analysis of Standard L-FDAA-L N-Methyl Valine (Positive mode) | S176 |
| **Figure S152.** | LCMS analysis of Standard L-FDAA-L N-Methyl Valine (Negative mode) | S177 |
| **Figure S153.** | LCMS analysis of Standard L-FDAA-D/L N-Methyl Valine (Positive mode) | S178 |
| **Figure S154.** | LCMS analysis of Standard L-FDAA-L N-Methyl Valine (Positive mode) | S179 |
| **Figure S155.** | LCMS analysis of Standard L-FDAA-D/L N-Methyl Valine (Positive mode) | S180 |
| **Figure S156.** | LCMS analysis of Standard L-FDAA-D/L N-Methyl Valine (Negative mode). | S181 |
| **Figure S157.** | LCMS analysis of Standard L-FDAA-D/L N-Methyl Valine (Negative mode) | S182 |
| **Figure S158.** | LCMS analysis of Standard L-FDAA-D/L N-Methyl Valine (Negative mode). | S183 |
| **Figure S159.** | LCMS analysis of L-FDAA derivatives of Transitmycin (R1) (Positive mode) | S184 |
| **Figure S160.** | LCMS analysis of L-FDAA derivatives of Transitmycin (R1) (Negative mode) | S185 |
| **Figure S161.** | LCMS analysis of L-FDAA derivatives of R3 (Positive mode) | S186 |
| **Table S9a.** | Analysis of L-FDAA derivates of acid hydrolysate of Transitmycin R1 by HPLC-MS | S187 |
| **Table S9b.** | Analysis of L-FDAA derivates of acid hydrolysate of R3 by HPLCMS | S187 |
| **Table S10.** | Physico-chemical properties of R2 | S188-89 |
| **Table S11.** | Physico-chemical properties of R3 | S190-91 |
| **Table S12** | Drug resistant profile of the clinical isolates of *Mycobacterium tuberculosis* used to determine the anti TB activity of Transitmycin | S192-194 |
| **Table S13** | Anti-HIV activity of Transitmycin on various HIV-1 subtypes | S195 |

**S-Table 1. Phenotypic characteristics of *Streptomyces* sp. R2**

| **Characteristics** | **Results** |
| --- | --- |
| **Micromorphology** |  |
| Aerial mycelium | Present |
| Substrate mycelium | Present |
| Spore chain morphology | Rectus flexibile, non fragmented |
| Spore surface | Hairy |
| **Cultural characteristics** |  |
| Colony consistency | Powdery |
| Aerial mass colour | Ash white |
| Reverse side pigment | Yellow |
| Soluble pigment | Yellow |
| Melanoid pigment | Absent |
| **Growth on Different media** |  |
| ISP1 | Moderate |
| ISP2 | Good |
| ISP3 | Good |
| ISP4 | Good |
| ISP5 | Moderate |
| ISP6 | Moderate |
| ISP7 | Good |
| **Carbon utilization** |  |
| Glucose | Good |
| Arabinose | Poor |
| Sucrose | Poor |
| Xylose | Moderate |
| Inositol | Poor |
| Mannitol | Good |
| Fructose | Moderate |
| Rhamnose | Moderate |
| Raffinose | No Growth |
| Cellulose | No Growth |
| **pH tolerance** |  |
| 5 | No growth |
| 7 | Good |
| 9 | Good |
| 11 | Moderate |
| **Growth at** |  |
| 200C | Poor |
| 300C | Good |
| 400C | Good |
| 500C | Moderate |
| **NaCl tolerance (%)** |  |
| 0 | Poor |
| 1 | Good |
| 2.5 | Good |
| 5 | Good |
| 7.5 | Poor |
| 10 | No growth |
| Susceptibility to | Tetracycline, chloramphenicol, erythromycin, gentamicin, vancomycin |
| Resistant to | Penicillin, nystatin, nalidixic acid |

**S-Table 2. Effect of solvents on the extraction of Transitmycin**

| **Solvents** | **Quantity of extracts** | **Antibacterial activity against *S. aureus* MTCC 96** | **Anti TB activity**  **(% reduction in RLU)** |
| --- | --- | --- | --- |
| **Methanol** | **40** | **14** | **58.31** |
| **Chloroform** | **41** | **9** | **18.07** |
| **Dichloromethane** | **40** | **13** | **22.71** |
| **Diethyl ether** | **10** | **14** | **74.23** |
| **Ethyl acetate** | **9** | **19** | **83.40** |
| **n-hexane** | **-** | **-** | **-** |


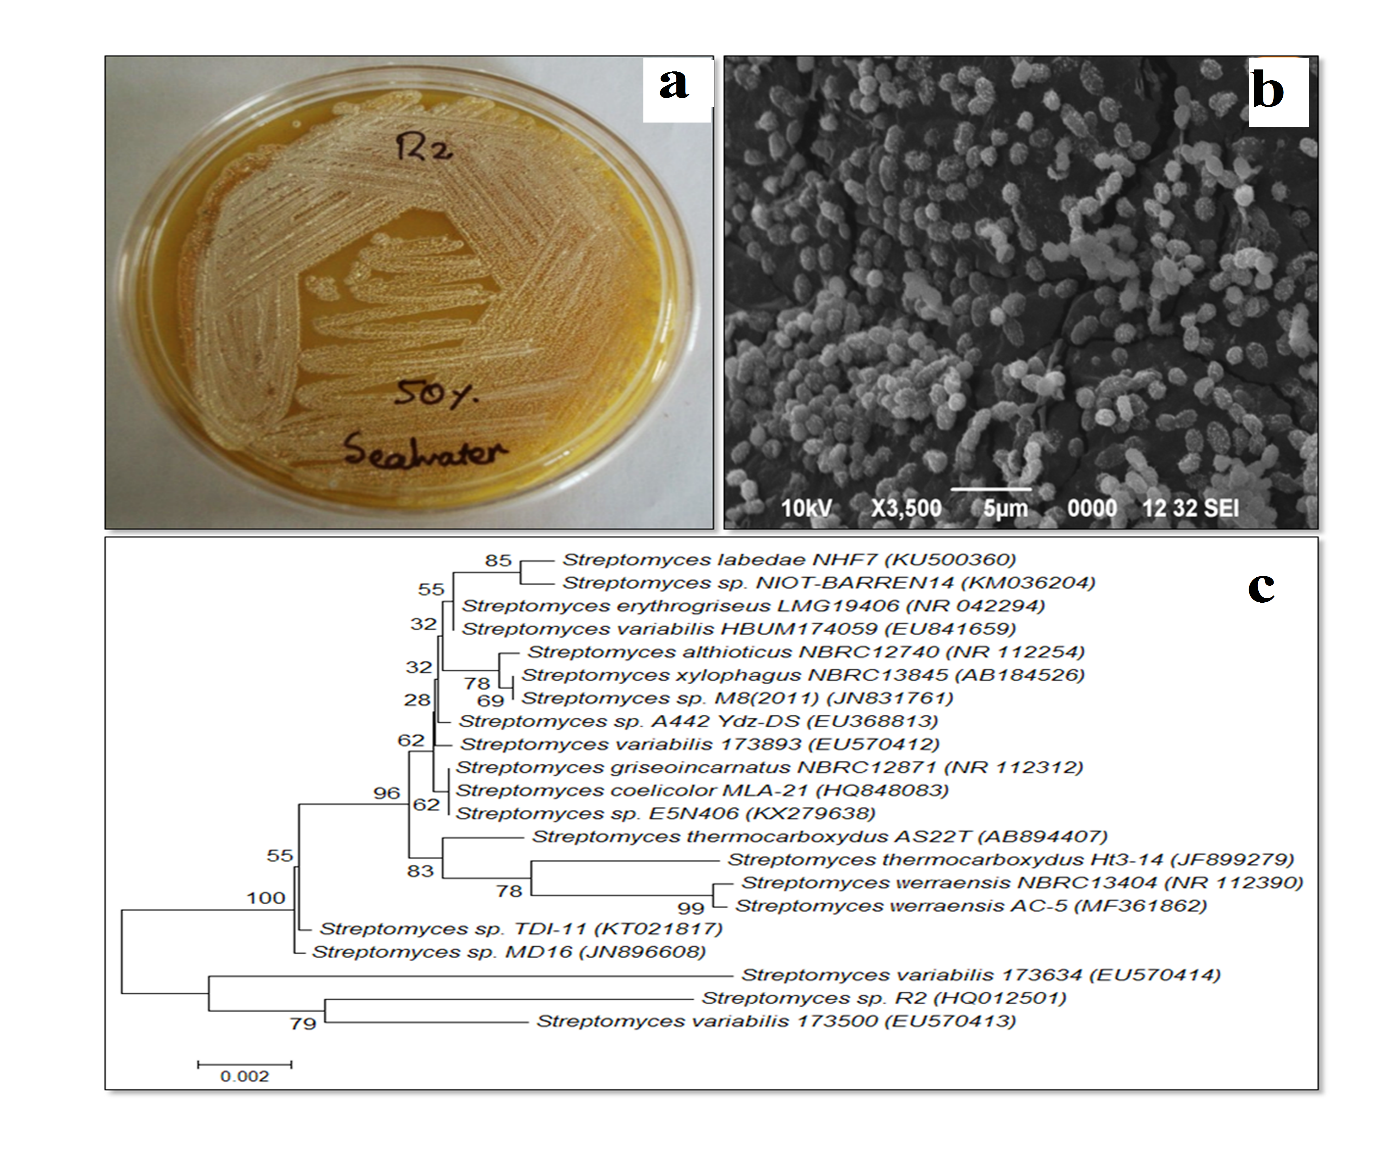


**Fig. S1**. Characteristic microbial strain and its morphological arrangement. **a** Cultural morphology and microscopic visualization. **b** SEM image (3,500X) of Streptomyces variabilis R2 on ISP2 agar medium. **c** Phylogenetic dendrogram obtained by distance matrix analysis of 16s rRNA gene sequences, showing the position of strain R2 among its phylogenetic neighbours.


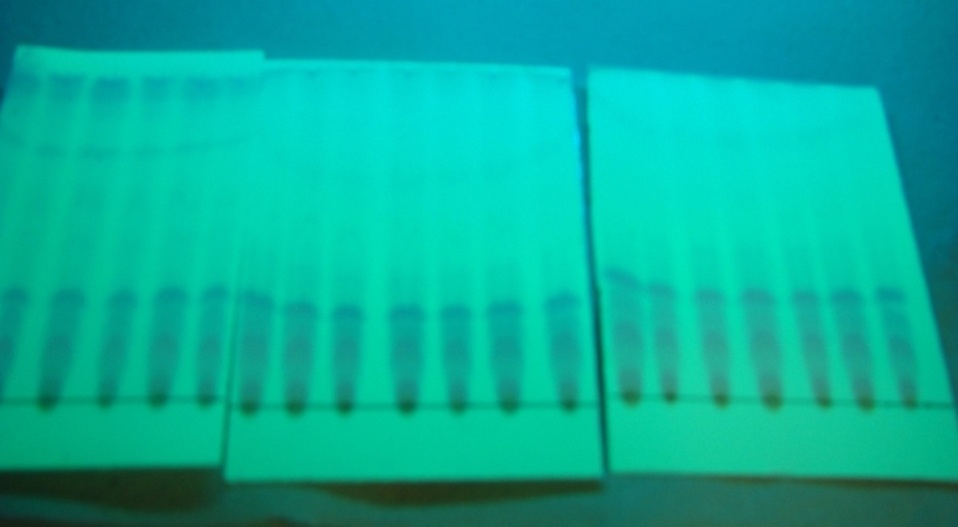

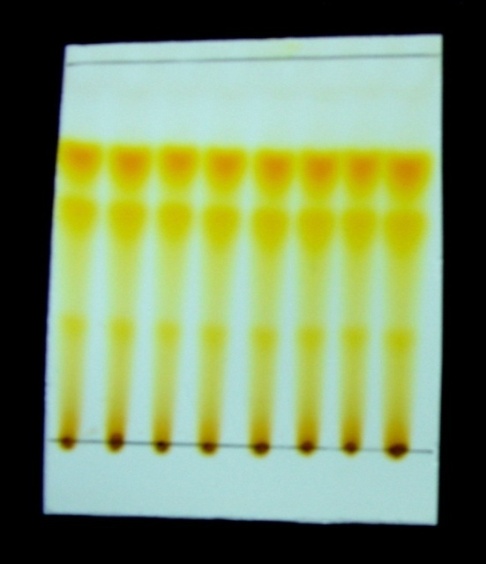


**(a)**

**(b)**

**R2**

**Transitmycin (R1)**

**R3**


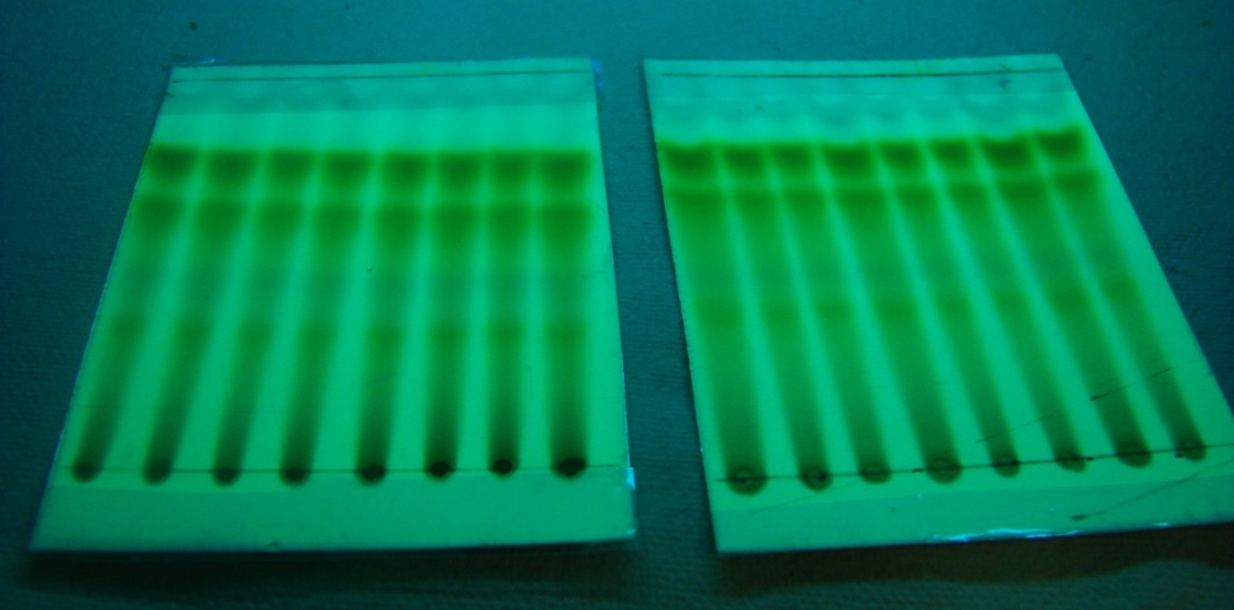
 **Solvent system for TLC: Ethyl acetate /Methanol, (9.5:0.5)**

**Rf value of Transitmycin (R1) = 0.8**

**(c)**

**Rf value of R2 = 0.6**

**Rf value of R3 = 0.3**

S**olvent system for TLC: Ethyl acetate/Methanol, (9.5:0.5)** (a) TLC of Ethyl acetate extract of Streptomyces sp. R2 in UV light (b) Long UV (c) Short UV


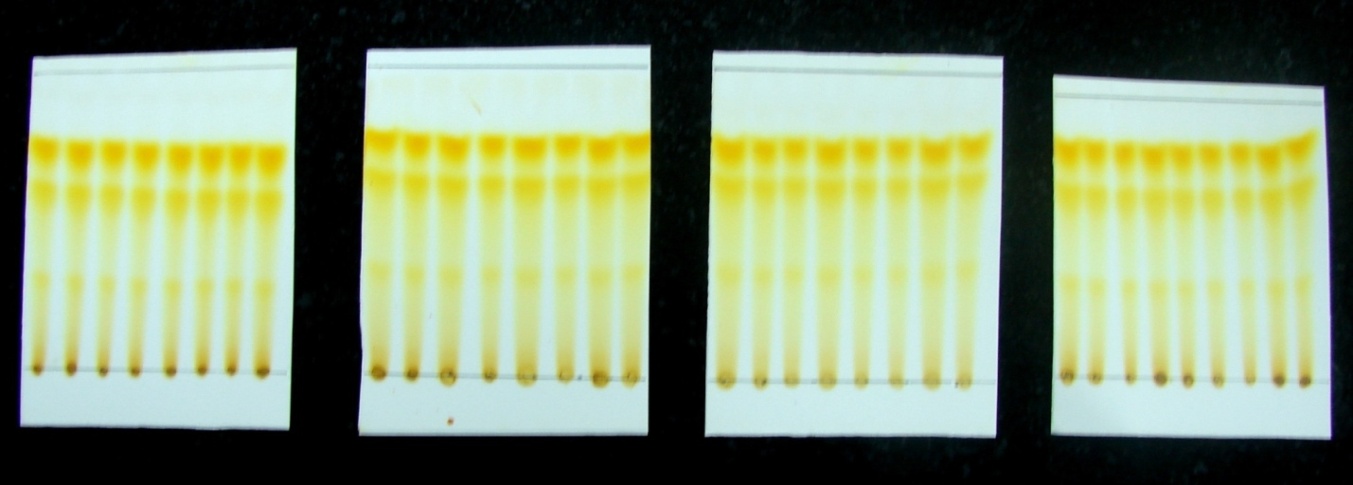


**Solvent used for Preparative TLC: Ethylacetate:methanol, (9.5:0.5)**

**Figure S2. Purification of EA extract of *Streptomyces* sp. R2 by Preparative Thin-Layer Chromatography**

**Extraction and Isolation**

Purification of compounds were performed by preparative thin layer chromatography (TLC) using Merck silica gel 60 (GF254) pre coated aluminium (6x8 cm size) plates.The crude pigment was purified by using preparative thin layer chromatography commercially available pre coated silica gel chromatography sheets (6×8 cm size) were used. To find out the best solvent system to separate the crude compound, the solvents were used in different proportions, among all solvent systems used, Ethylacetate: methanol (9.5:0.5) showed good separation. The crude pigment (2 g) was dissolved in 5 mL of ethyl acetate. With the help of capillary tube, the sample was spotted at the bottom of silica gel coated sheet (6 x 8 cm) and then it was placed in the developing 100 mL beaker containing mobile phase (Ethyl acetate/ Methanol, 9.5:0.5) 5 mL, covered with the watch glass in order to prevent the evaporation of the solvents. The solvent was allowed to run till it reaches about half a centimetre below the top of the plate. After running, the 200 sheets were kept at room temperature for the complete drying of the plate. Spots on TLC were detected under UV light (254 and 365 nm) and by spraying with concentrated H2SO4 followed by heating at 105 ºC for 5 min. After drying, the yellow pigment spot was scrapped, mixed with ethyl acetate and filtered using funnel fitted with what man filtered paper and Ethyl acetate was evaporated to dryness under vacuum to afford the pure compound Transitmucin R1 (10 mg), R 2 (10 mg), R3 (5 mg). Rf value of the spot separated on the TLC plate was determined. The solvent system Ethyl acetate: methanol (9.5:0.5) was found to have good separation with single spot when compared to all the solvent systems used for TLC.

**
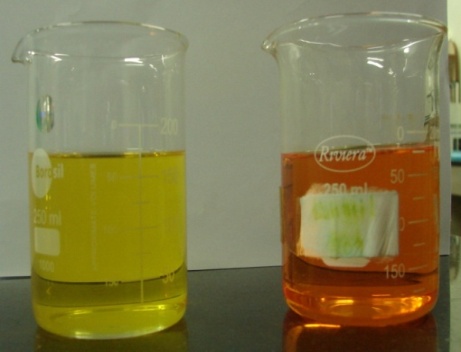
**

**
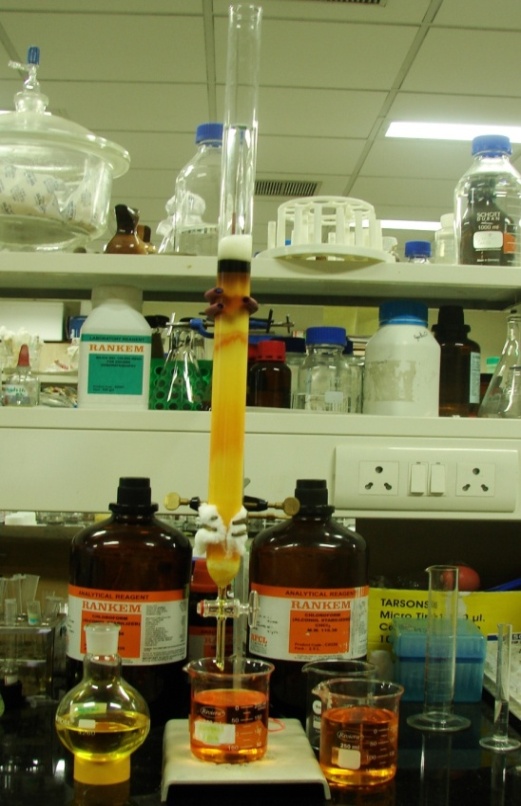

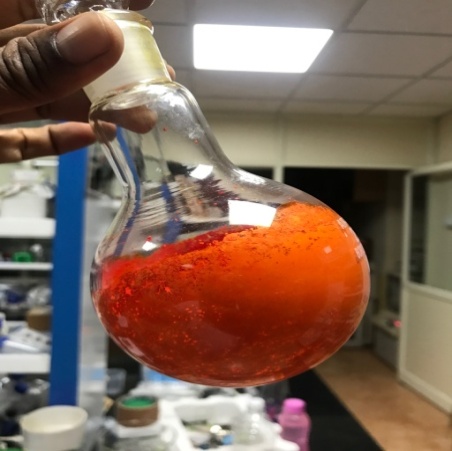

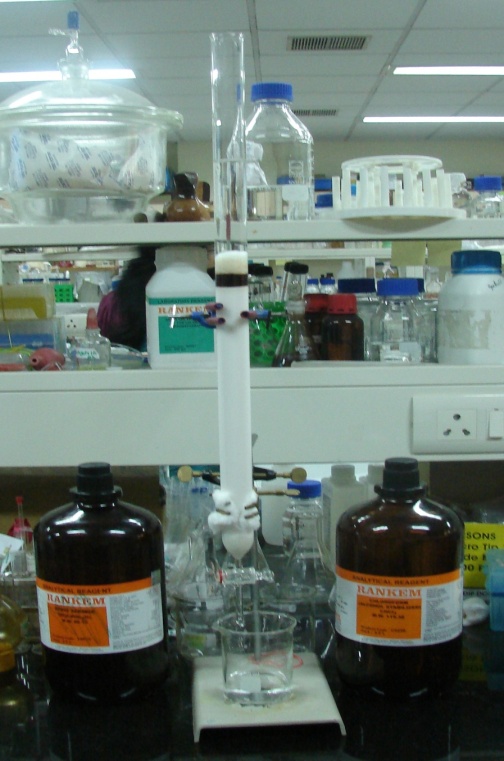

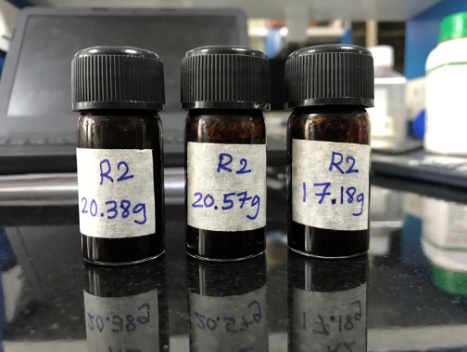
**

**(c)**

**(d)**

**(e)**

**(f)**

**(a)**

**
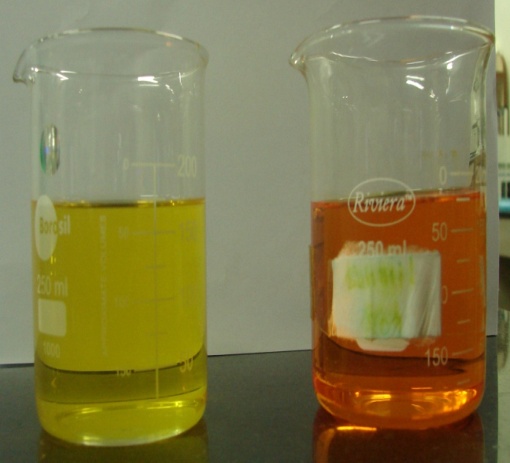

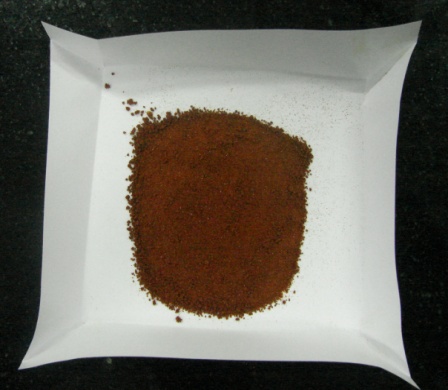
**

**(b)**

**
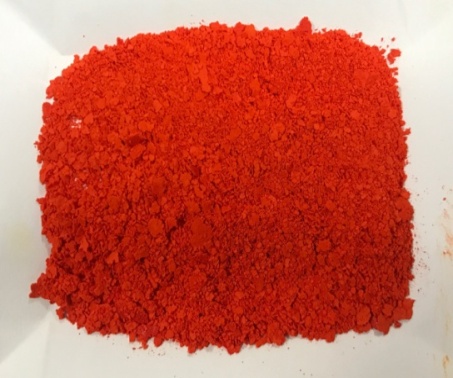
**

**(g)**

Column chromatography was carried out on Neutral Alumina (230-400 mesh) and Column size: (id 30m × 90 cm).**The crude ethyl acetate extract *Streptomyces* sp (R2) was purified using column chromatography packed with neutral alumina** using a gradient of 1% **Methanol/Chloroform mixture (CH3OH/ CHCl3) was used as the eluent.** Fractions were collected and concentrated under vacuum to afford pure compounds. **The desired product was monitored in a TLC with pre coated alumina sheet silica.** The isolated compounds were obtained Transitmycin (R1) (200 mg), R2 (100 mg), R3 (50 mg).

**
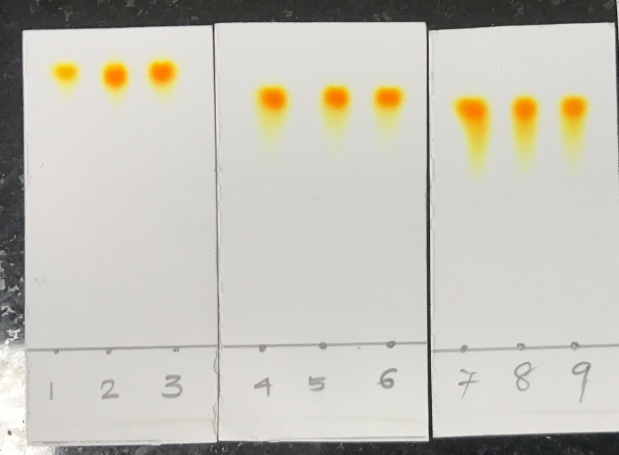

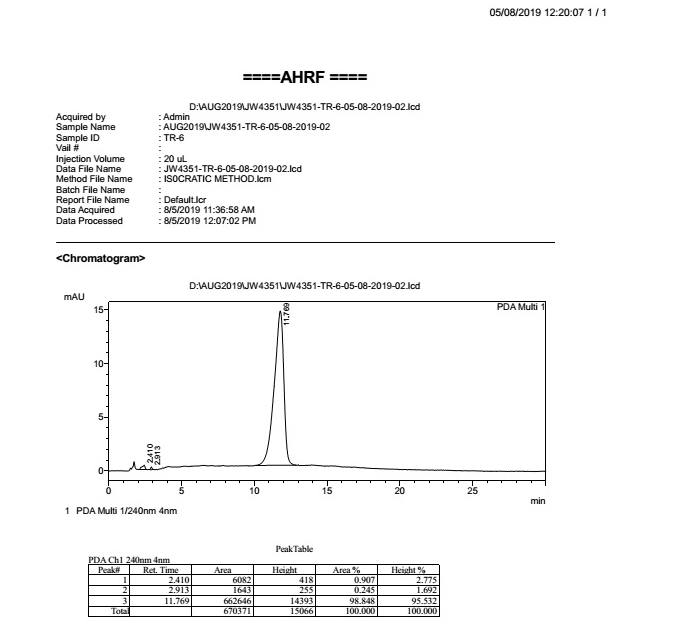
**

**(i)**

**Transitmycin (R1)**

**(h)**

**Figure S3. Scheme of purification of EA extract of *Streptomyces* sp. R2 by column chromatography**

**Figure S3 (a)** Crude (b) Crude with alumina (c) Before elution (d) After elution (e) solution form (f) solid form (g) After drying (h) TLC (i) R**P-**H**P**LC

**
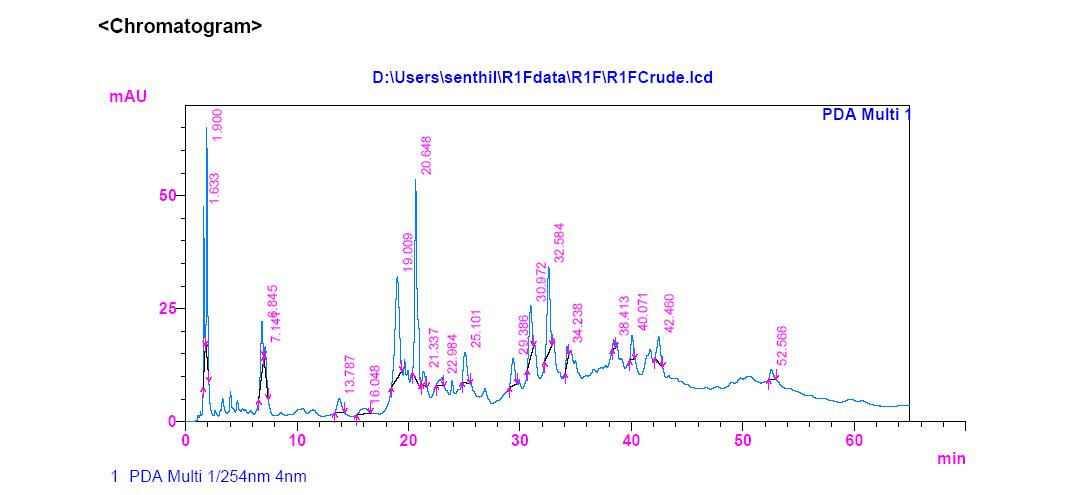
**

**Figure S4. RP HPLC of the crude ethyl acetate extract of *Streptomyces* sp. R2 (Batch II)**Analytical HPLC condition: Luna 5u C18 (2) 100 (150 X 4.6 mm) Solvent system: A: B (35: 65 v/v); flow rate 2 ml/min, 254 nm Solvent A: Acetonitrile; Solvent B: Water, Detection: PDA, Injection volume: 20µl, Column Temperature: 30 0C

**
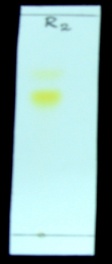

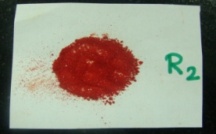

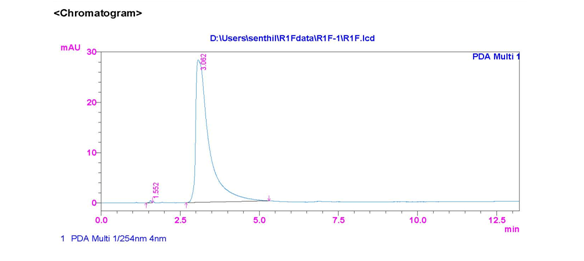

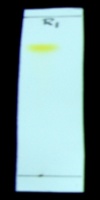

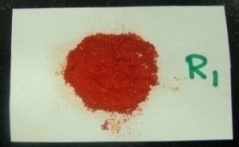

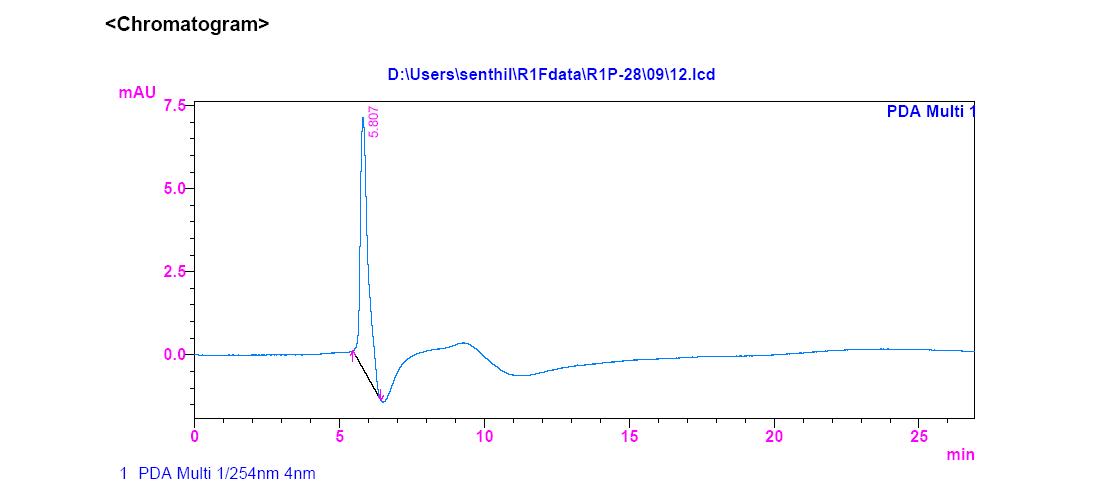
**

**(b)**

**(a)**

**
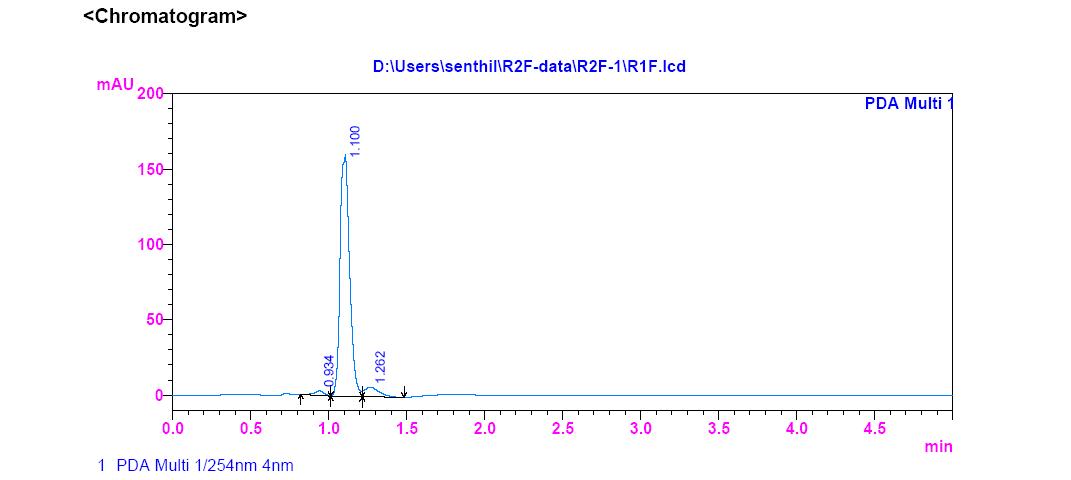
**

**S-Table 3. RP-HPLC Retention time of R1, R2, R3**

**(c)**


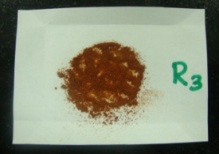

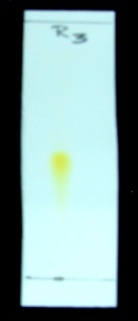


| a | Ret. Time of R1 | 5.807 min |
| --- | --- | --- |
| b | Ret. Time of R1 | 3.062 min |
| c | Ret. Time of R2 | 1.100 min |

**Figure S5. Purity of Transitmycin R1, R2, R3 were checked by RP HPLC method**

**
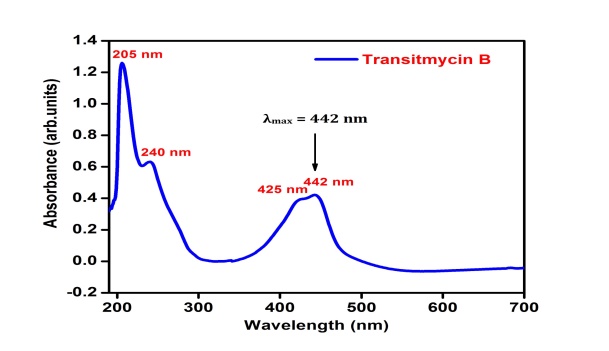
**

**
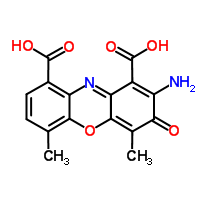
**

**Figure S6: UV/Vis Spectrum of R2 in methanol [UV: (MeOH) λ max, (log ε) 205, (1.25), 240 (0.63), 425 (0.39), 442(0.42) nm]**


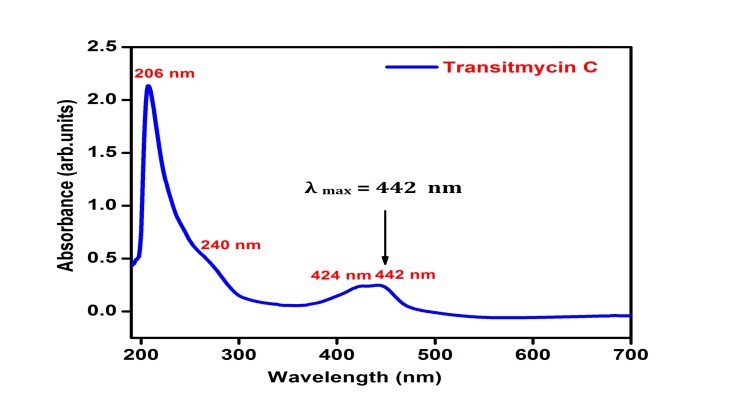


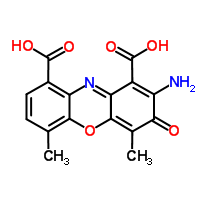


**Figure S7. UV/Vis Spectrum of R3 in methanol [UV (MeOH) λ max (log ε) 206 (1.90), 240 (0.69) 424 (0.191), 442.2 (0.19) nm]**

**
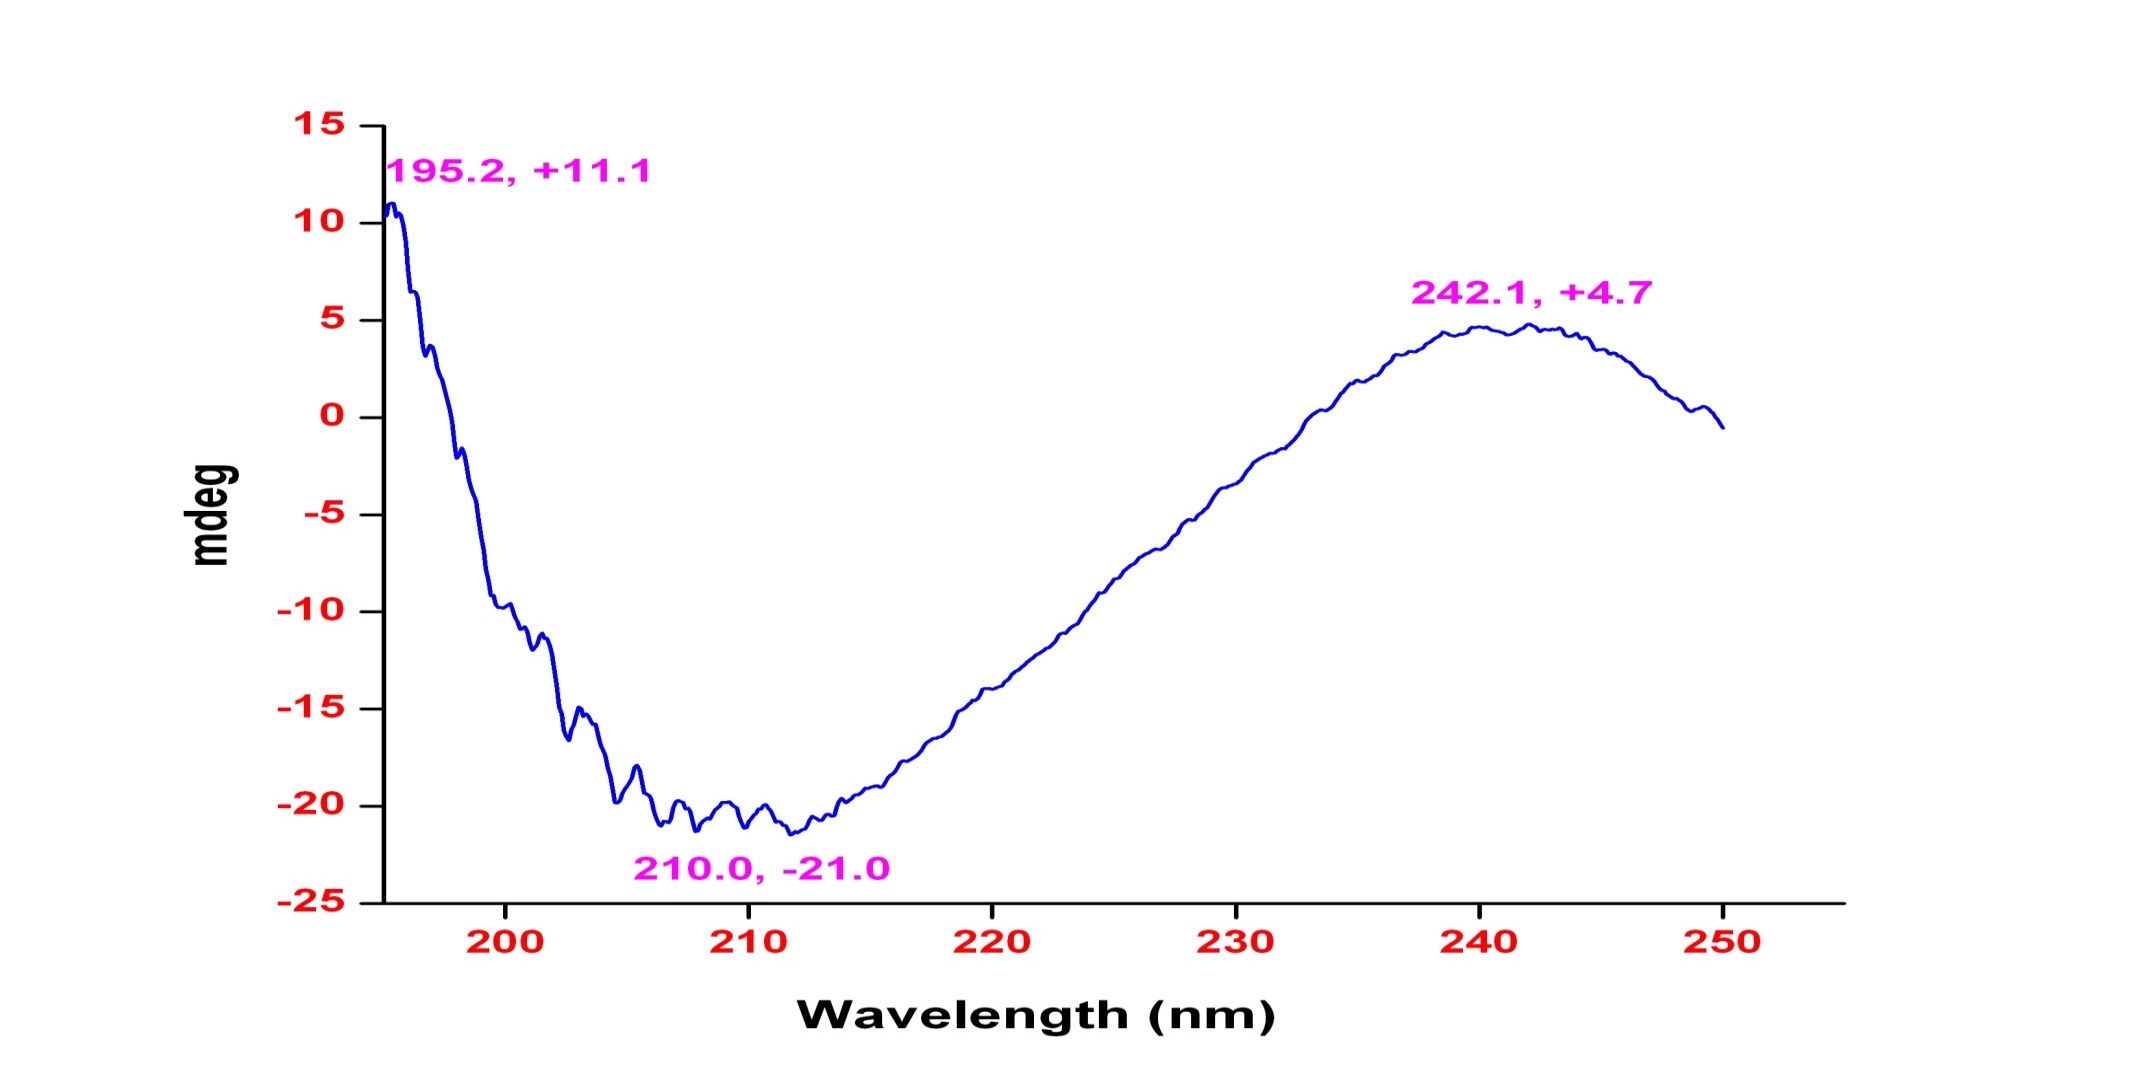
**

**Figure S8. Circular Dichroism Spectrum of Transitmycin (R1) in methanol CD: [MeOH, [nm], (mdeg)]: λmax(Δε) 195 (+11.1), 210 (-21.0), 242 (+4.7)**

**
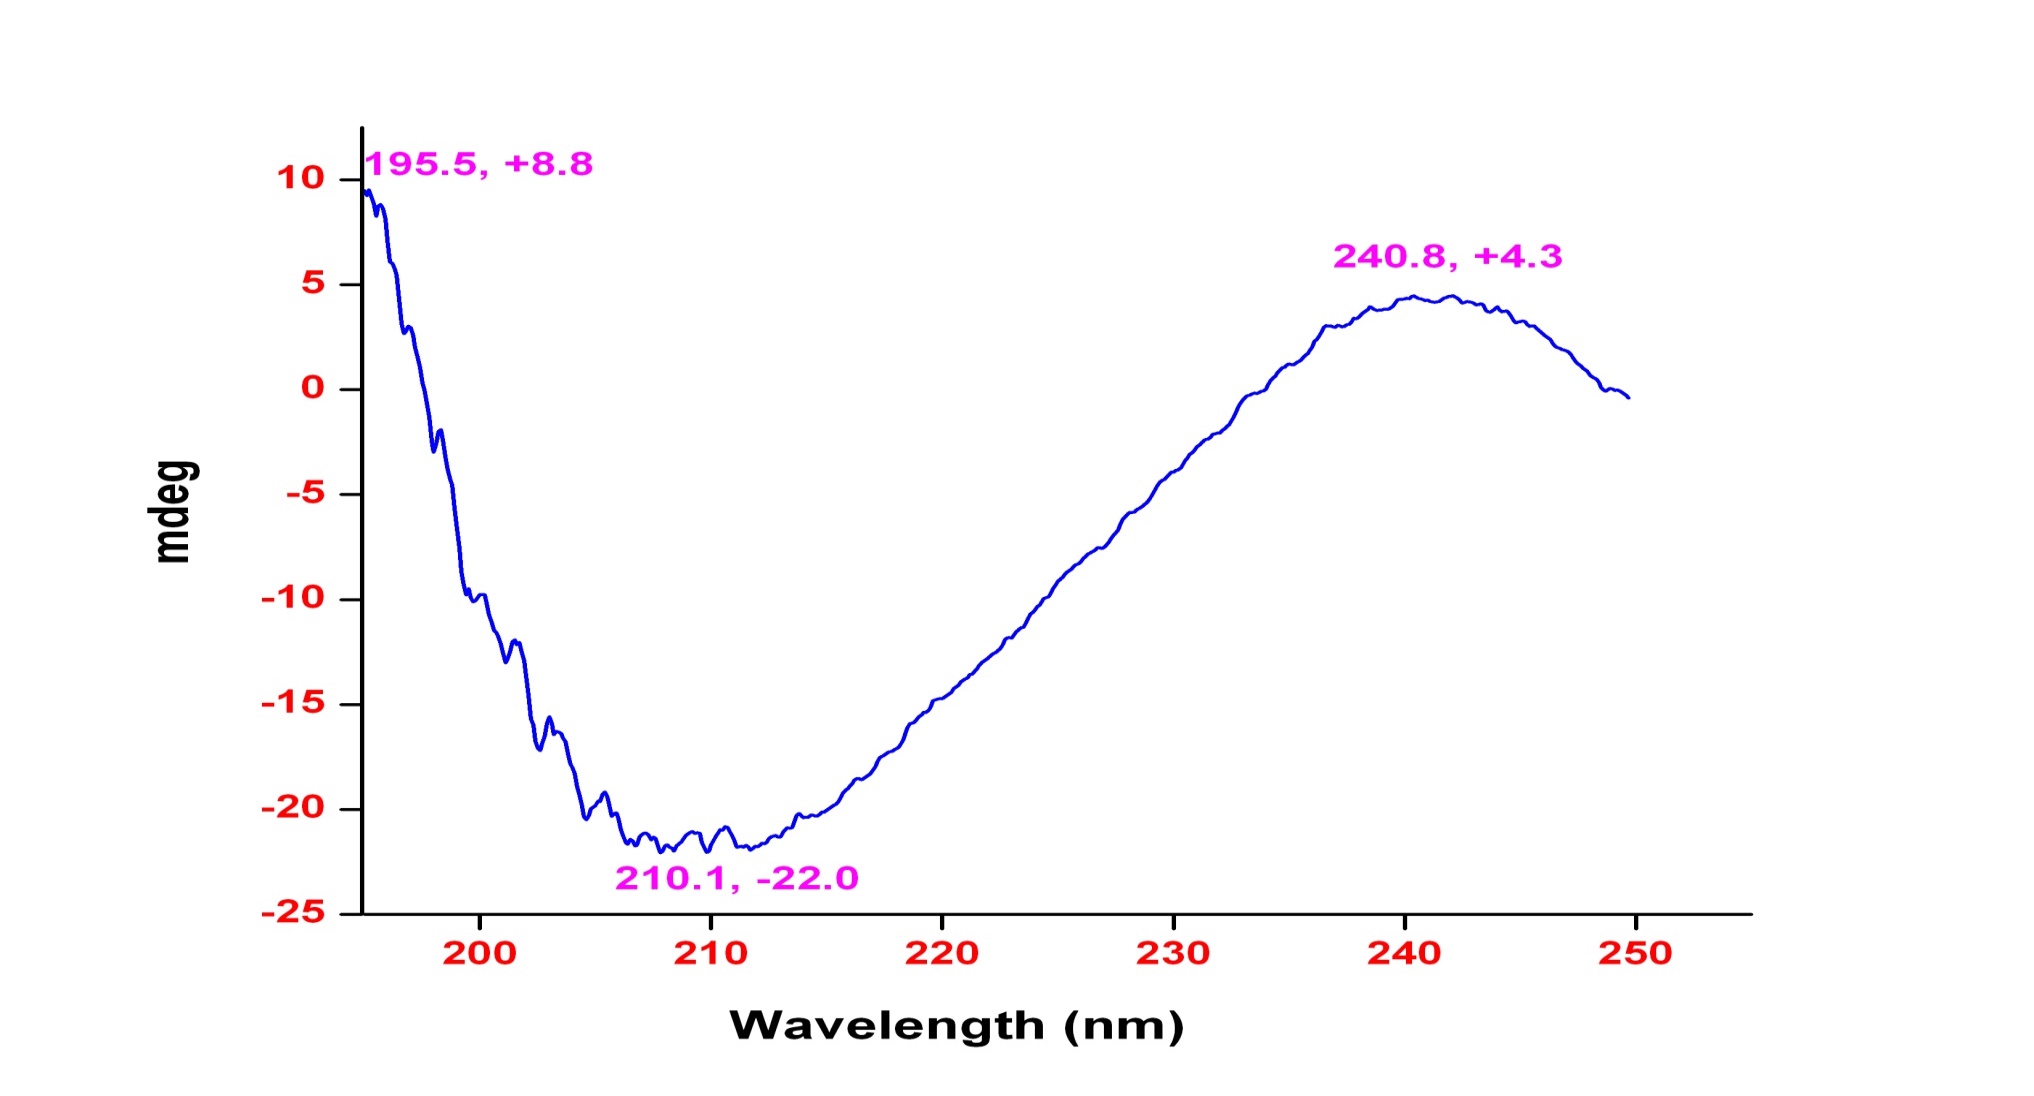
**

**Figure S9. Circular Dichroism Spectrum of R2 in methanol CD: [MeOH, [nm], (mdeg)]: λmax, (Δε) 195 (+8.8), 210 (-22.0), 240 (+4.3) nm**

**
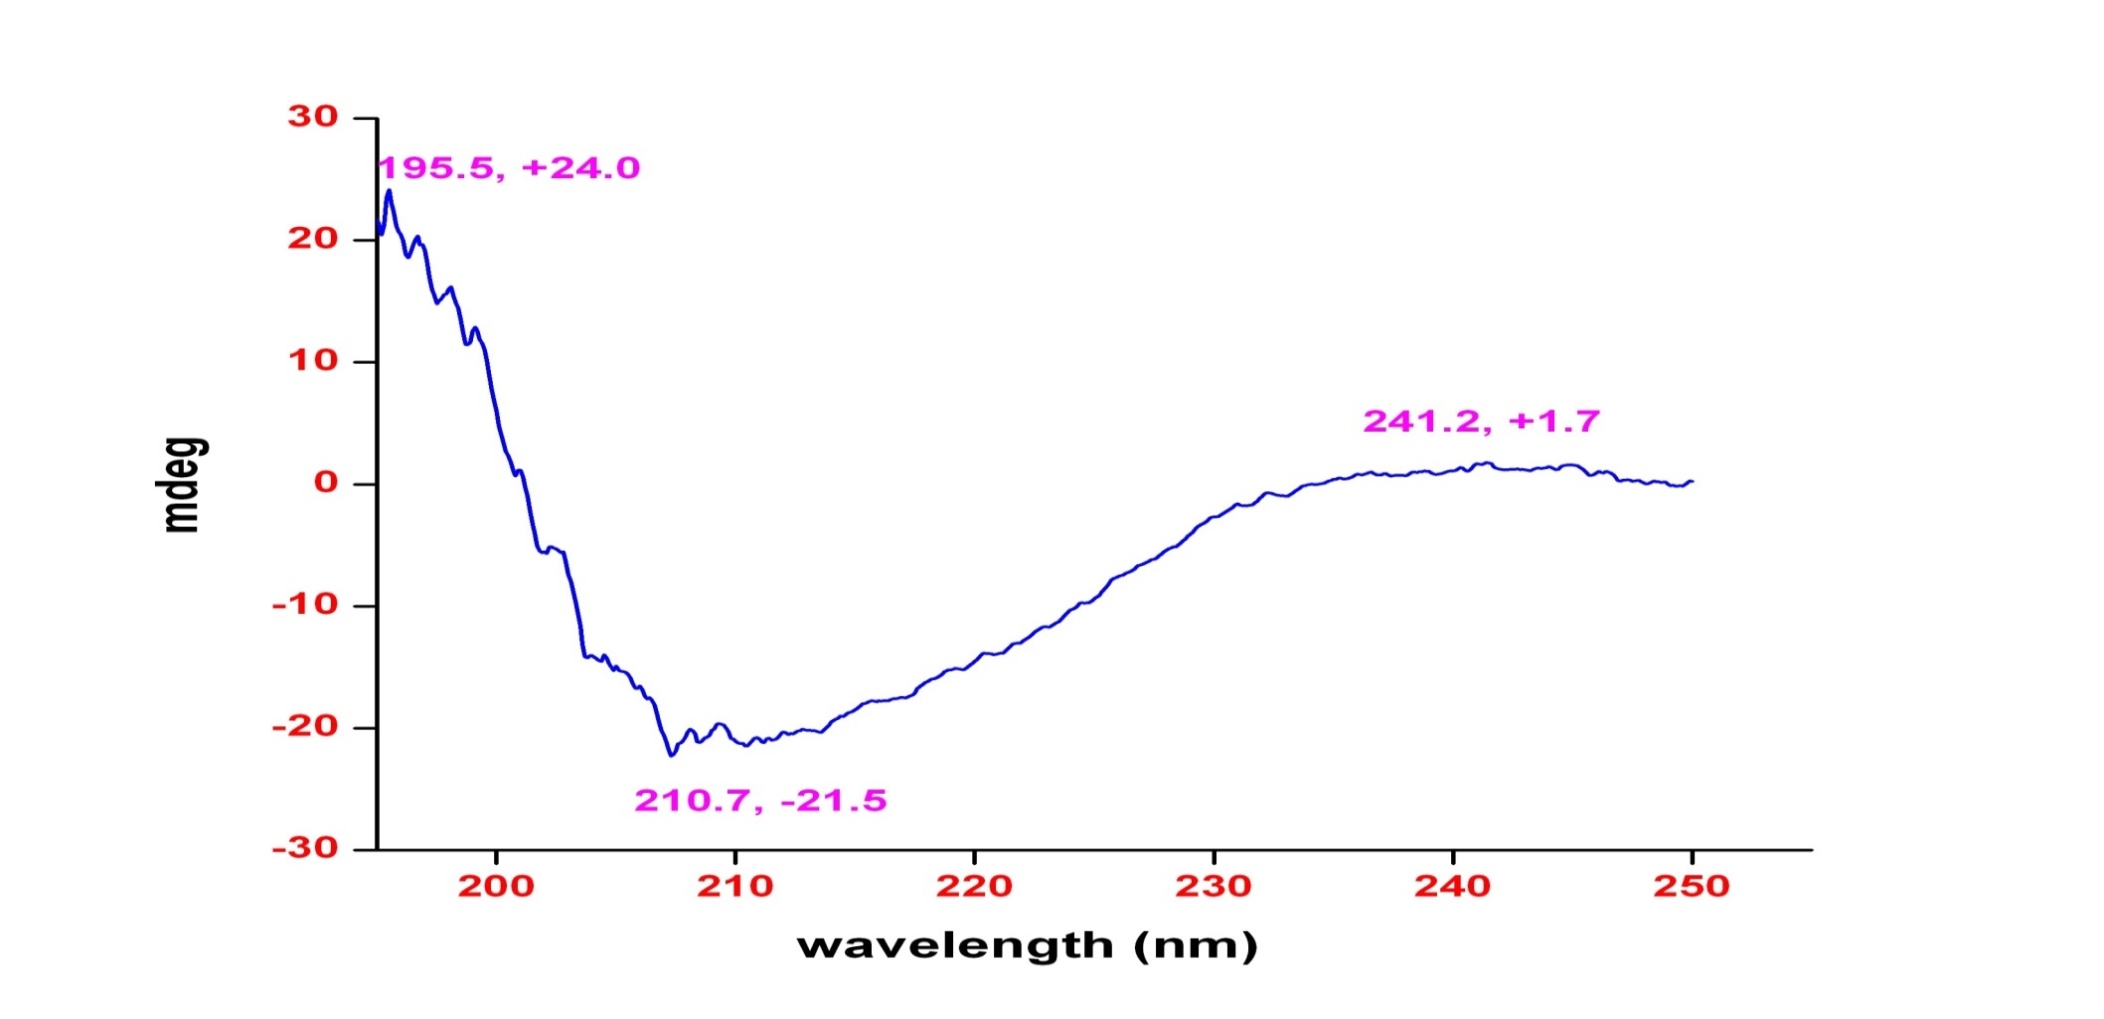
**

**Figure S10. Circular Dichroism Spectrum of R3 in methanol CD: [MeOH, [nm], (mdeg)] λmax(Δε) 195 (+24.0), 210 (-21.5), 241 (+1.7)**

**

**

**Figure S11. FT-IR Spectrum of Transitmycin (R1), R2, R3**

**
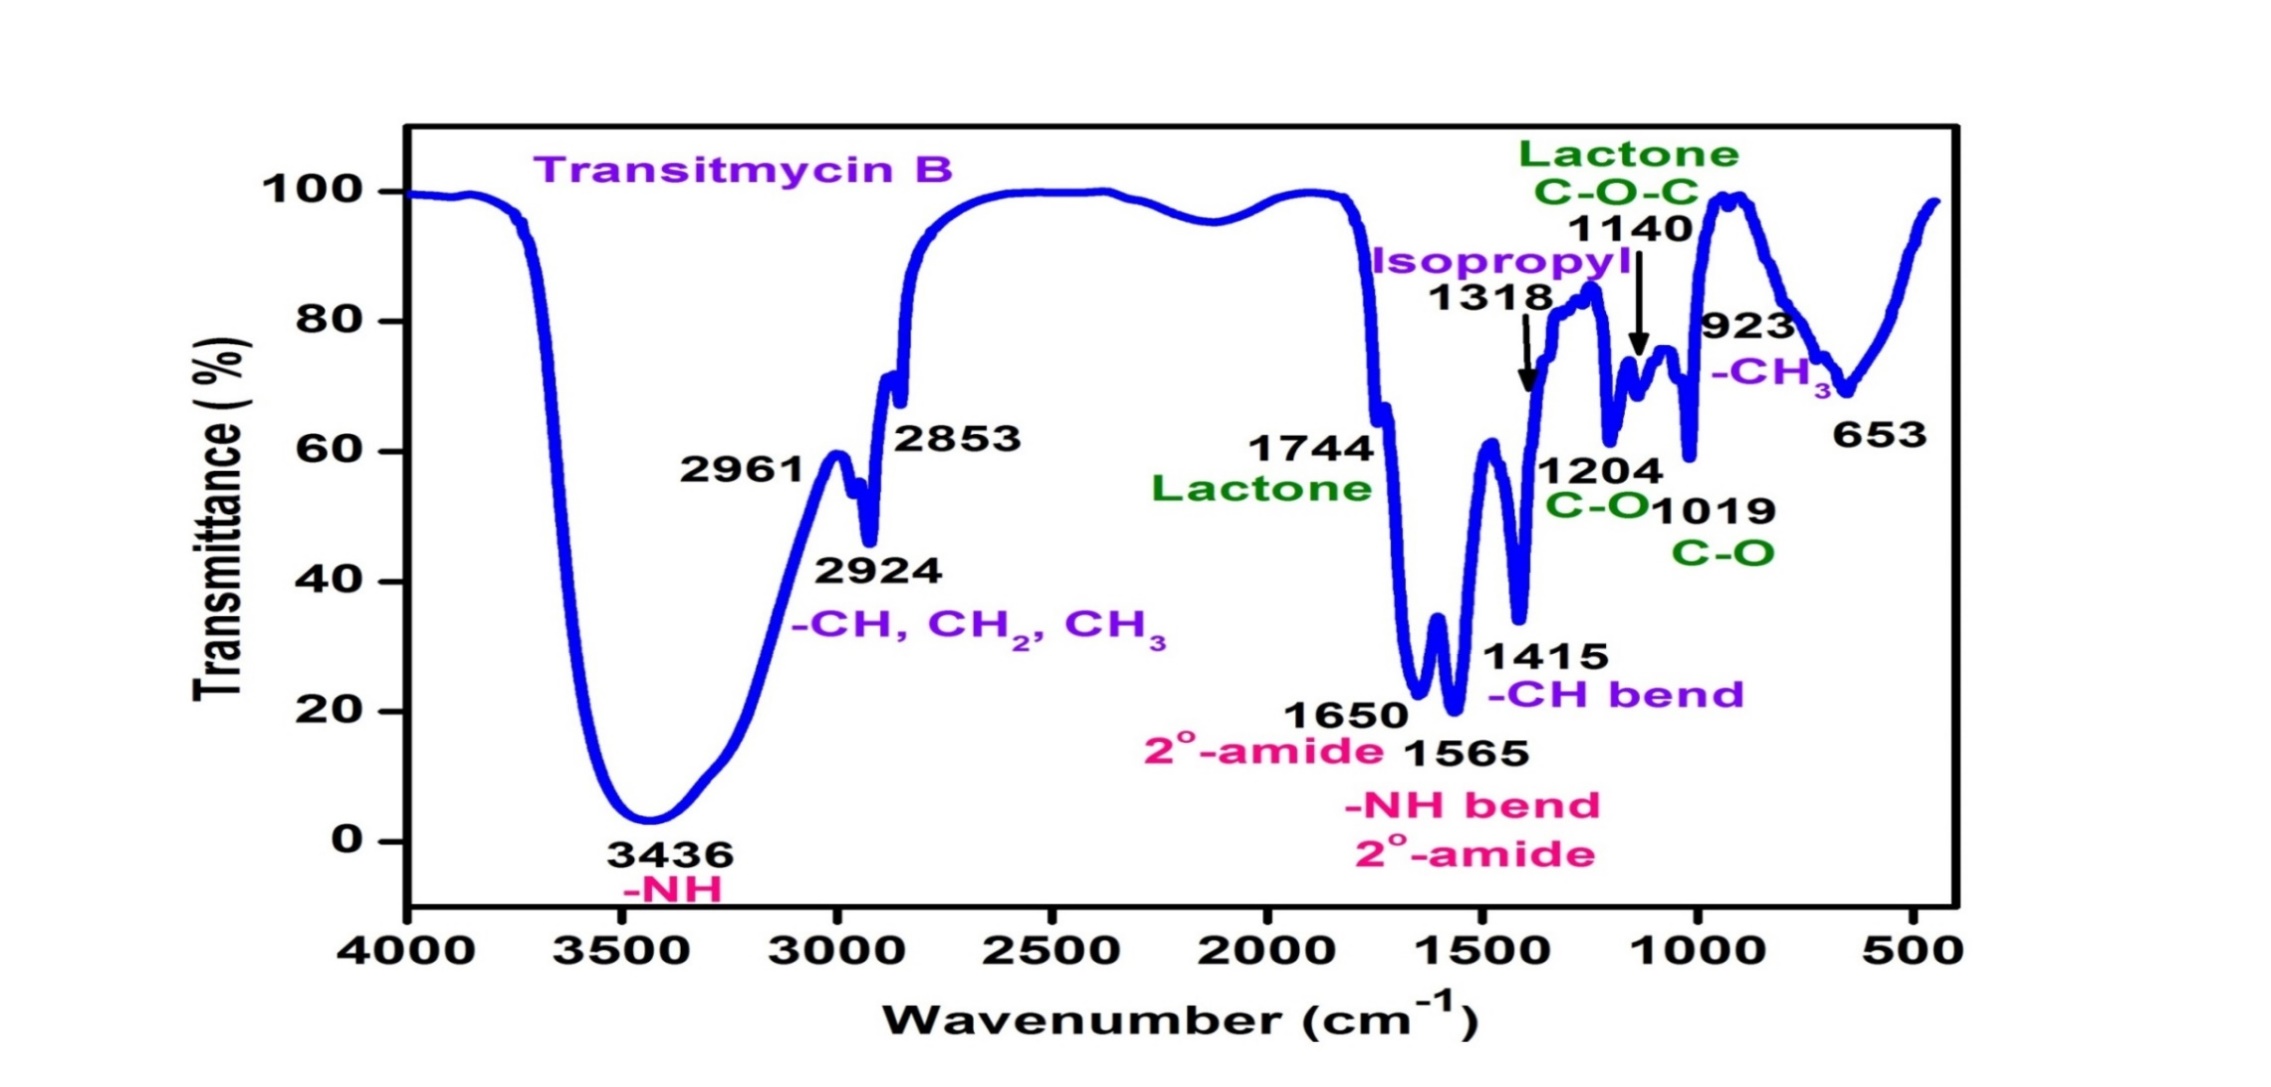
**

**Figure S12. FT-IR Spectrum of R2**

**
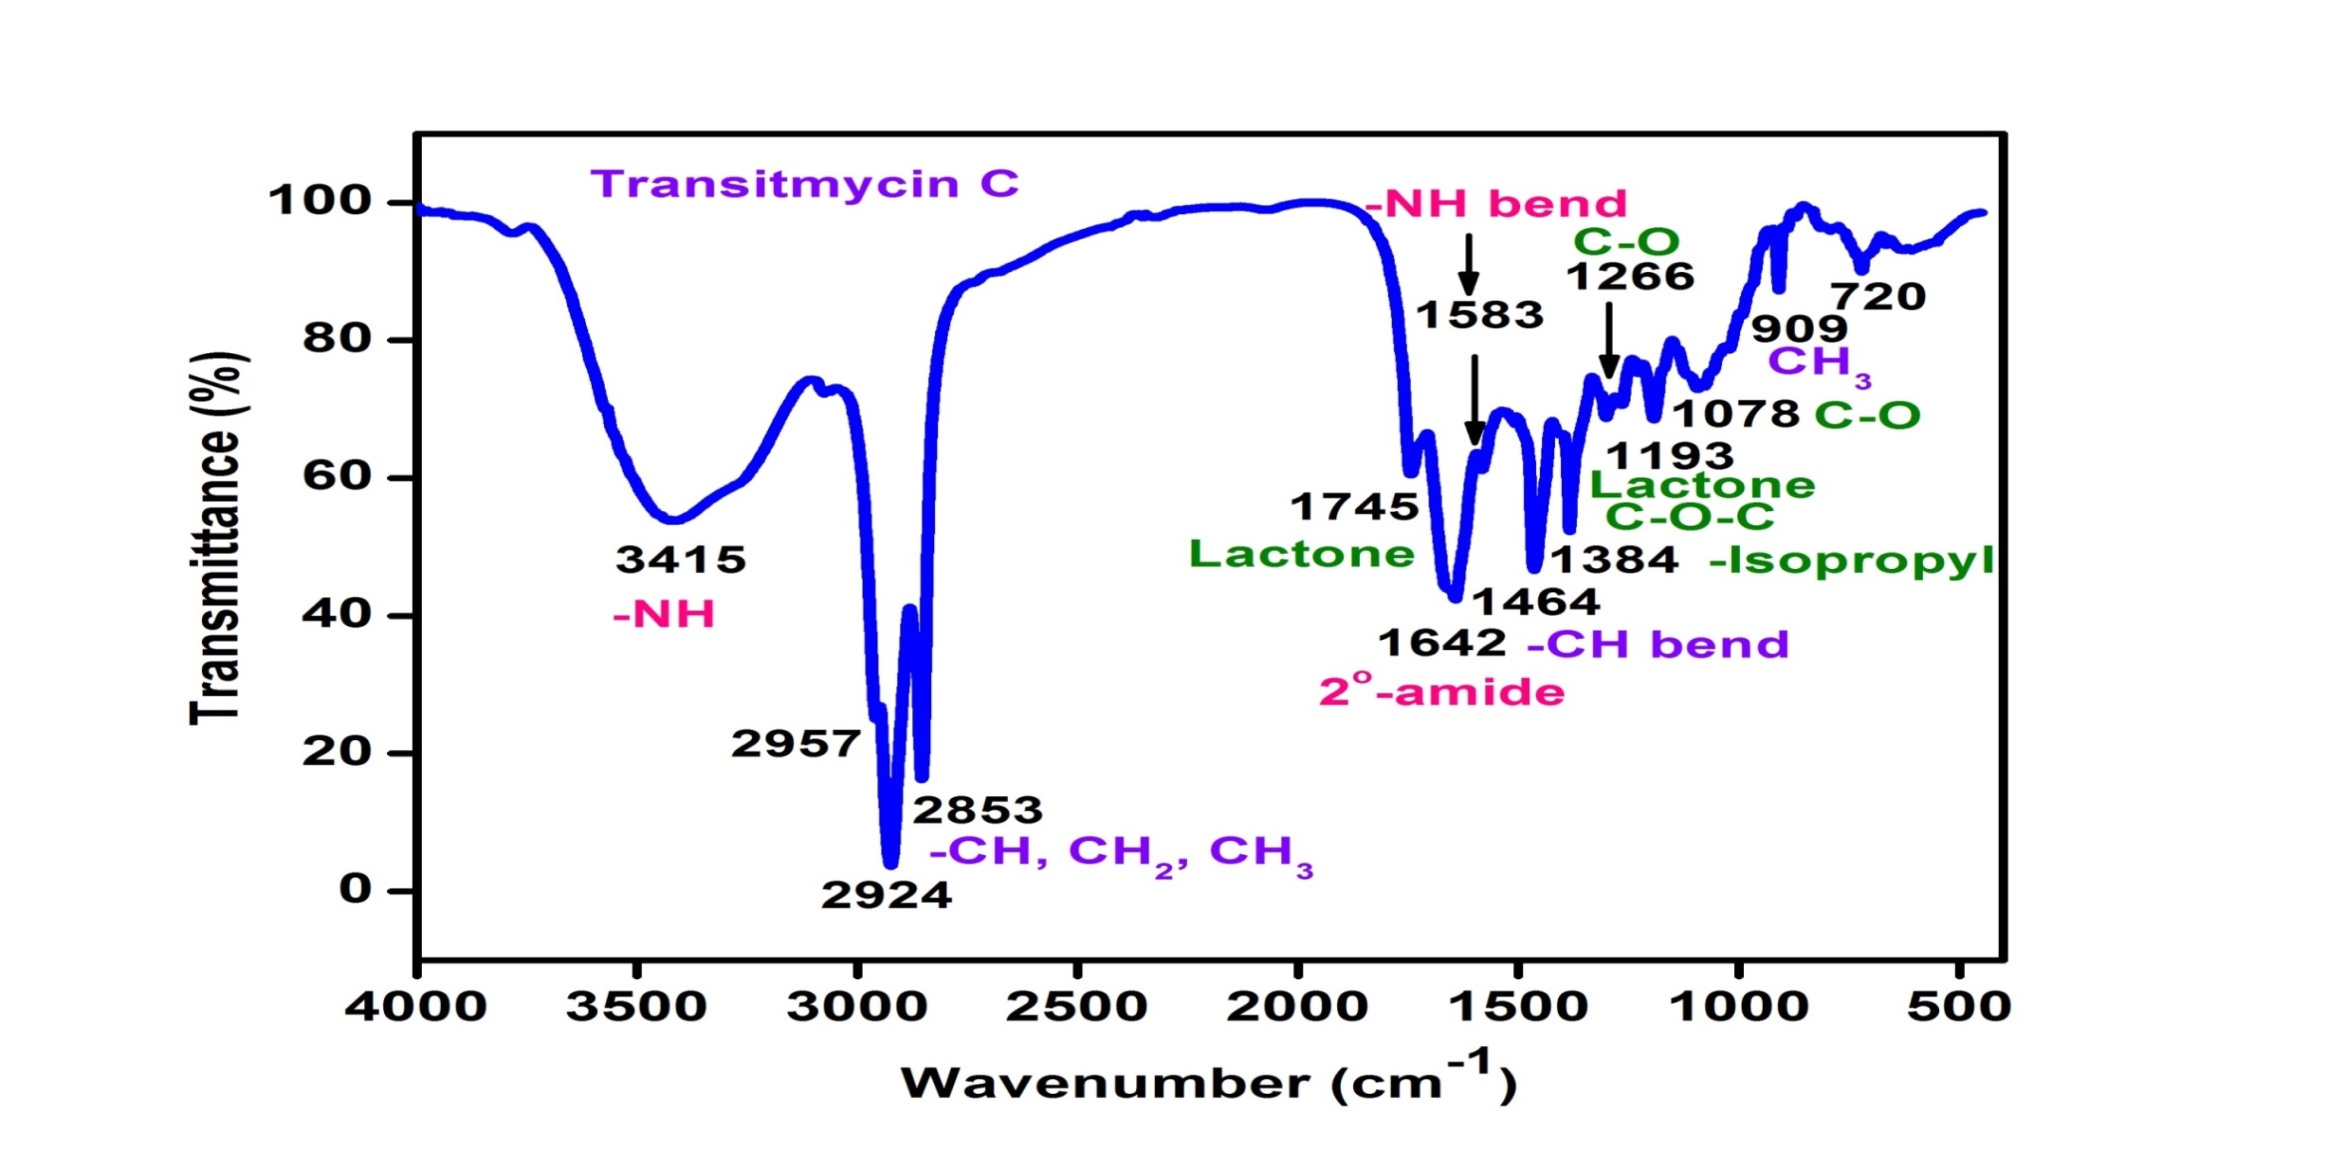
**

**Figure S13. FT-IR Spectrum of R3**

| **R1** | IR (KBr cm-1), 3435 cm-1 for NH, 2958, 2924 cm-1 (m, -CH str, asym, CH3 and CH2), 2872 cm-1, 2853 cm-1 (m, -CH str, sym, CH3 and CH2),1746 cm-1  (s, C=O str, lactone ring ), 1642 cm-1(s, -C=O str, 20 amide), 1524, 1503 (m, -NH bend, 20 amide), 1466 (m, CH bend (scissoring), CH2), 1379 cm-1 (s, -CH bend, isopropyl group), 1268 (s, C-O str, ester), 1194 ( C-O-C of lactone ) 1099, 1059, 1017 (s, C-O or C-N ), 720, 712, 694, 689 (s, -CH bend, oop, aromatic ring), 909 (w, CH3 rocking). |
| --- | --- |
| **R2** | IR (KBr cm-1), 3436 cm-1 for NH, 2961, 2924 cm-1 (m, -CH str, asym, CH3 and CH2), 2872 cm-1, 2853 cm-1 (m, -CH str, sym, CH3 and CH2),1744 cm-1  (s, C=O str, lactone ring ), 1650 cm-1 (s, -C=O str, 20 amide),1565, 1503 (m, -NH bend, 20 amide), 1415 (m, CH bend (scissoring), CH2), 1318 cm-1 (s, -CH bend, isopropyl group), 1268, 1204 (s, C-O str, ester),1140 ( C-O-C of lactone ), 1045, 1019 (s, C-O or C-N ), 720, 712, 653 (s, -CH bend, oop, aromatic ring), 929 (w, CH3 rocking). |
| **R3** | IR (KBr cm-1), 3415 cm-1 for NH, 2957, 2924 cm-1 (m, -CH str, asym, CH3 and CH2), 2872 cm-1, 2853 cm-1 (m, -CH str, sym, CH3 and CH2),1745 cm-1  (s, C=O str, lactone ring ), 1642 cm-1(s, -C=O str, 20 amide), 1583, 1507 (m, -NH bend, 20 amide), 1464 (m, CH bend (scissoring), CH2), 1384, 1301 cm-1 (s, -CH bend, isopropyl group), 1266, 1228 (s, C-O str, ester),1193 ( C-O-C of lactone ) ,1093, 1078, 1017 (s, C-O or C-N), 909 (w, CH3 rocking) 720, 712, 694, 689 (s, -CH bend, oop, aromatic ring). |

**Table S4. IR Absorption Frequencies of Functional Groups Present in Transitmycin (R1), R2, R3**


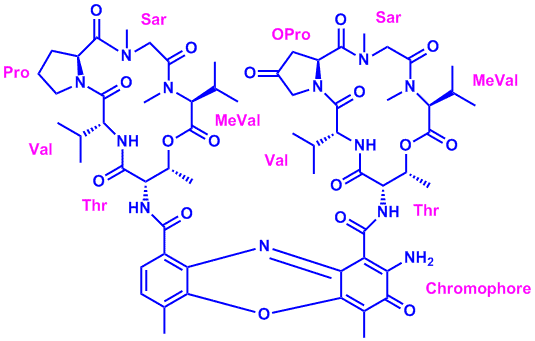

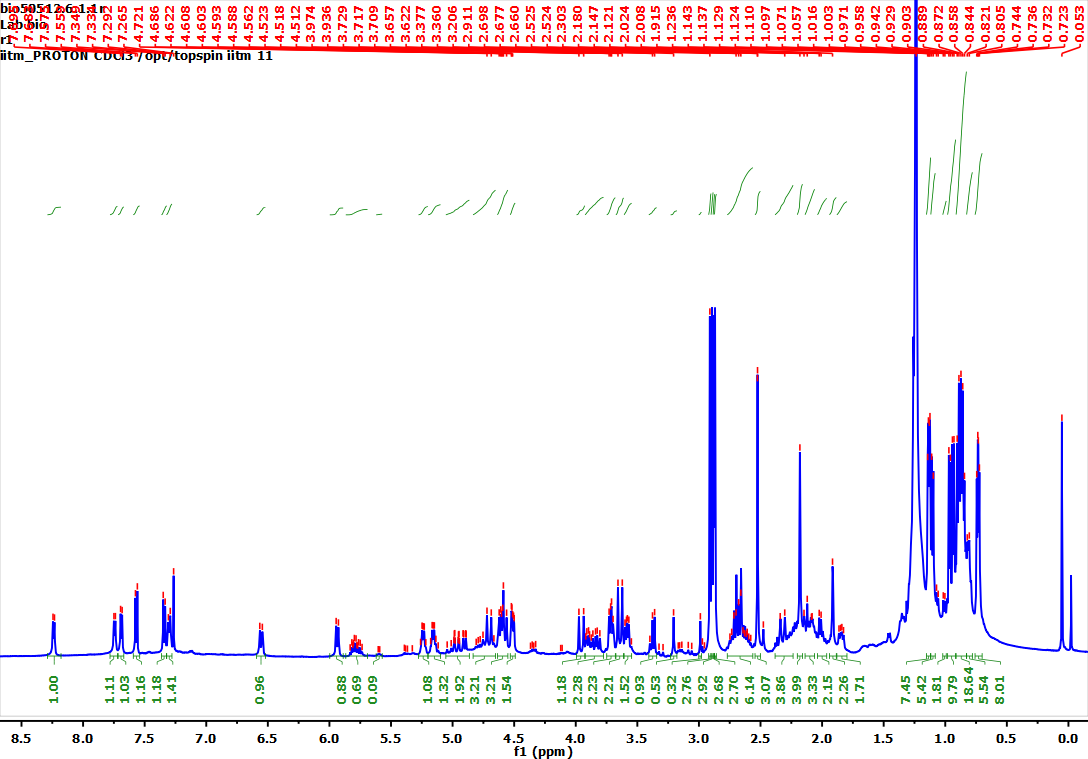


**Figure S14**. **1H-NMR (500 MHz, CDCl3) Spectrum of Transitmycin (R1)**


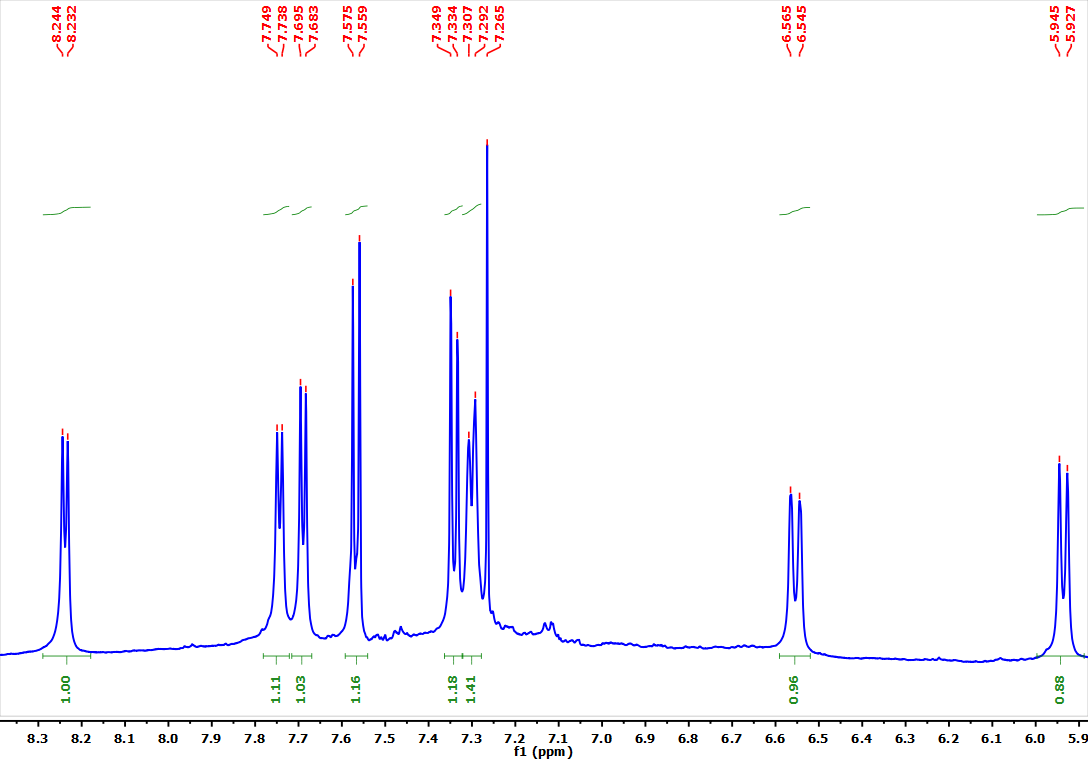


**7-H, 8-H of Chromophore**

**NH of β-Thr**

**NH of α- L- Val**

**NH of β-L- Val**

**NH of α-Thr**

**2H-β-Oxo-Pro**

**2H-α-Pro**

**Figure S15. Expansion of 1H-NMR (500 MHz, CDCl3) Spectrum of Transitmycin (R1)**


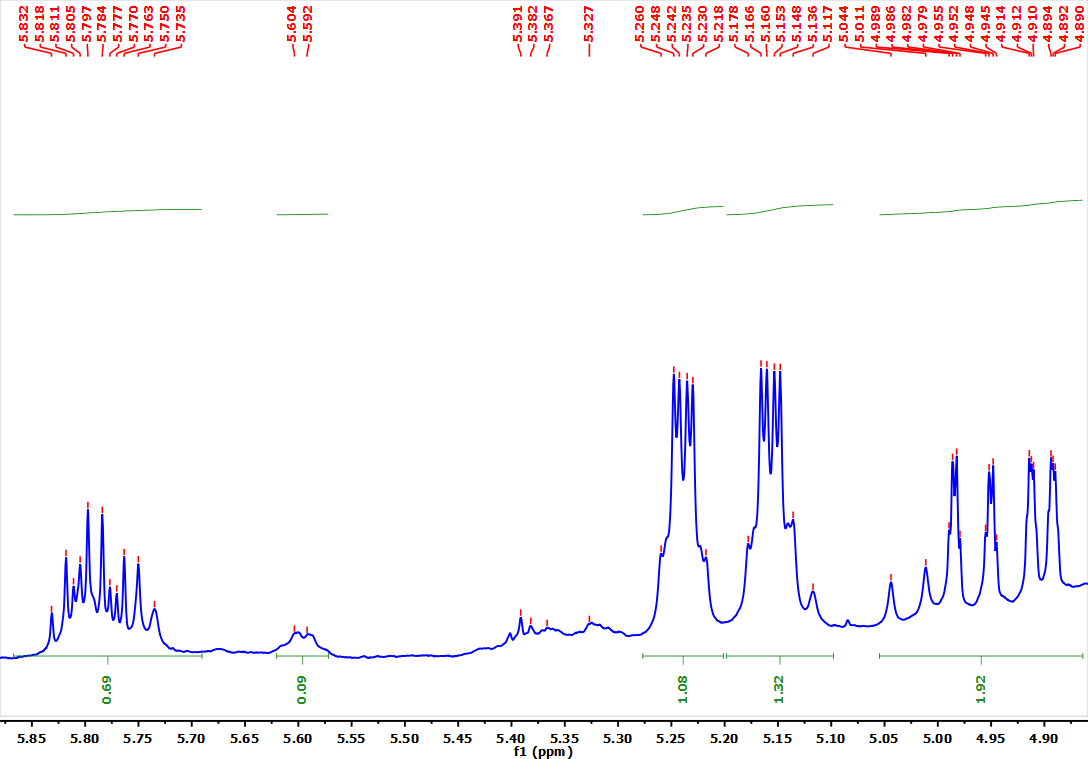


**3H-α-Thr**

**3H-β-Thr**


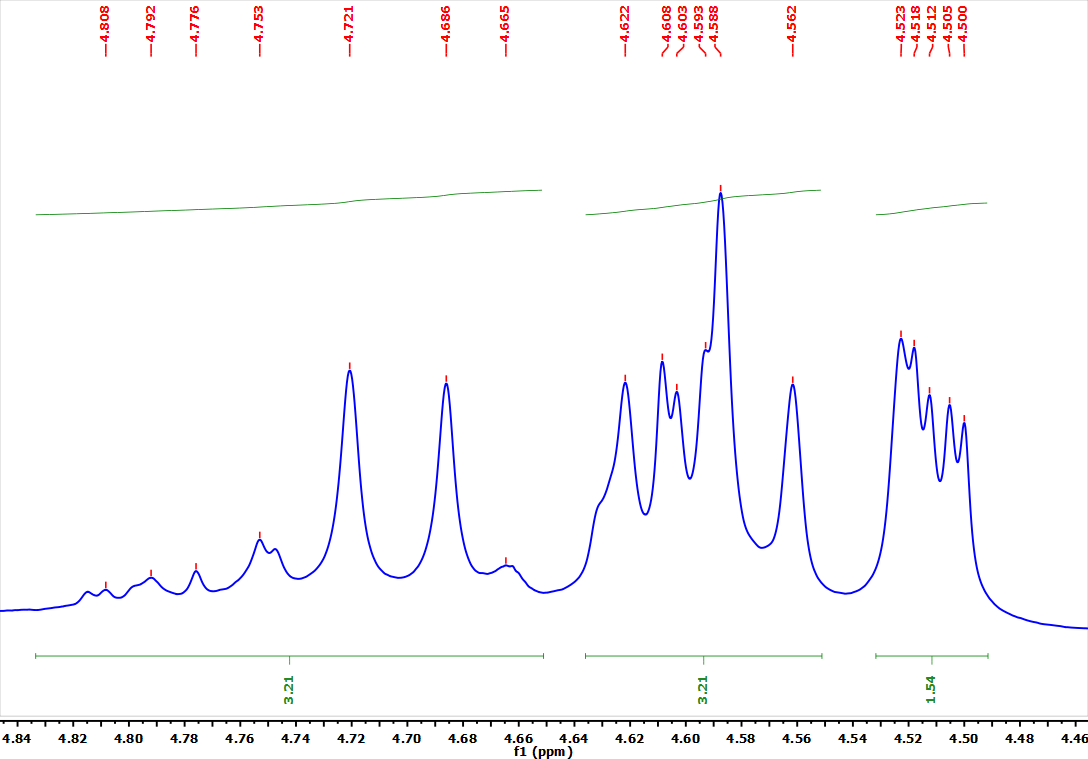


**2H-Hb-β-Sar**

**2H-β-Thr**

**2H-α-Thr**

**2Ha-α-Sar**

**Figure S16. Expansion of 1H-NMR (500 MHz, CDCl3) Spectrum of Transitmycin (R1)**


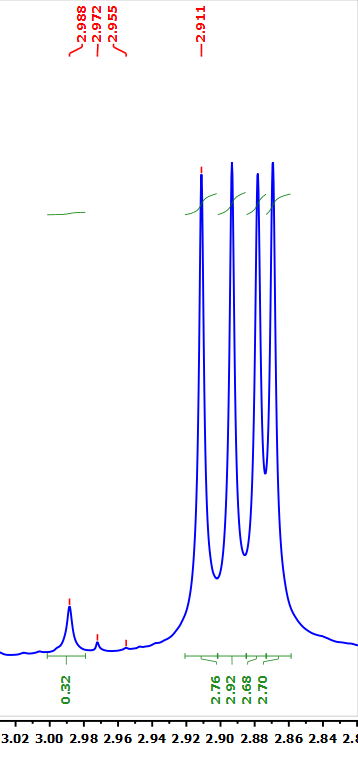

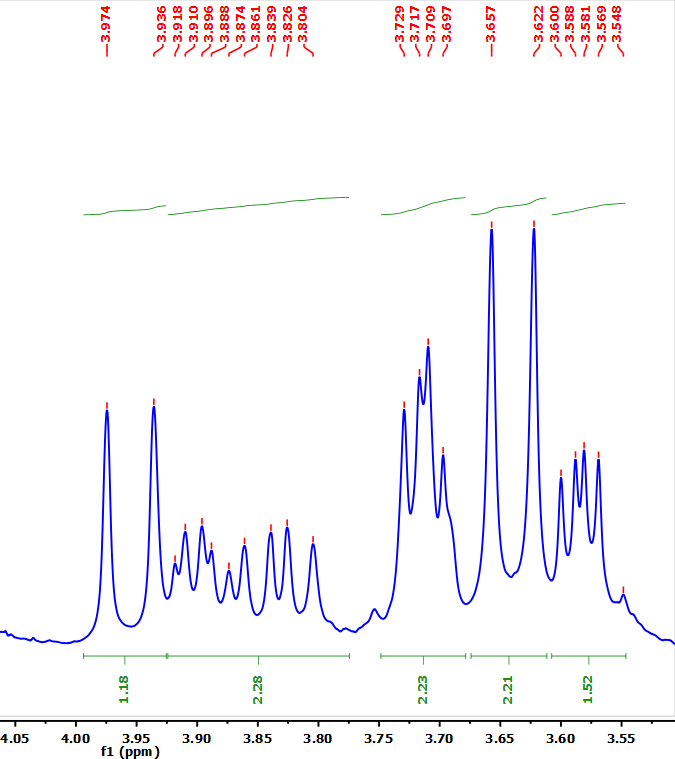


**2Hb-β-Sar**

**2-Hb-α-Sar**

**4X N-Methyl of Val and N-Methyl of Sar**

**Expansion of 1H-NMR (500 MHz, CDCl3) Spectrum of Transitmycin (R1)**


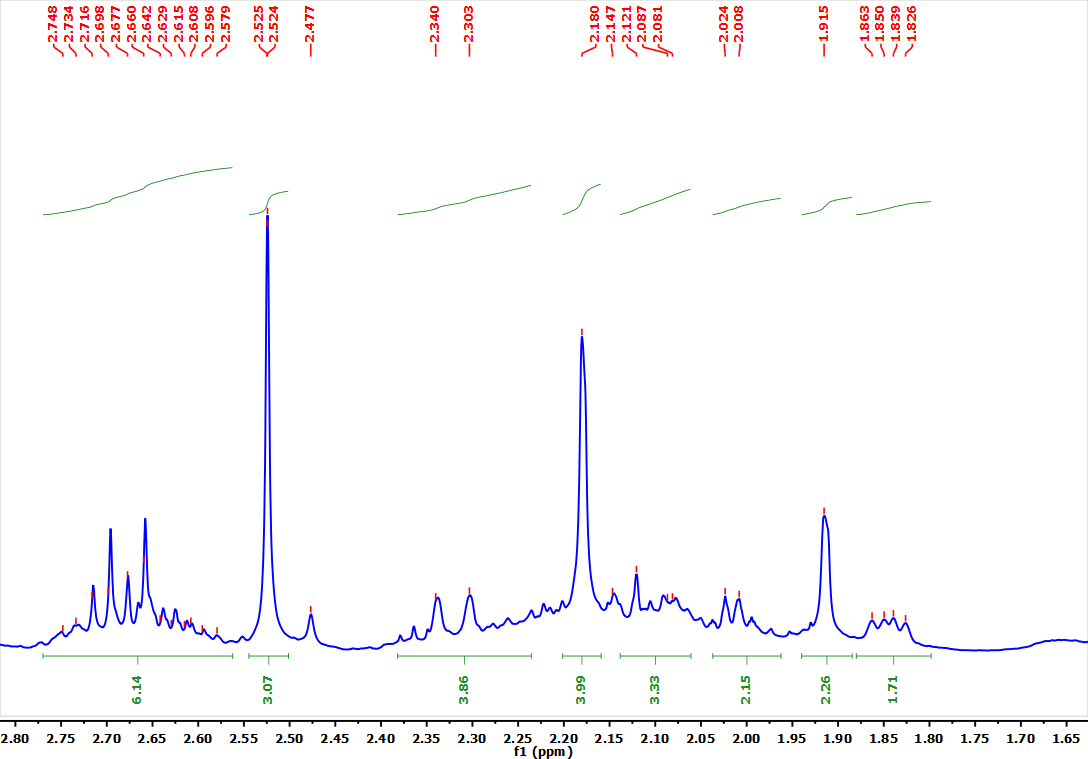


**11-C-Methyl**

**3-α-Pro**

**2-α-Me Val**

**2-β-Me-Val**

**12-C-Methyl**

**3-β-Pro**

**4-β-Pro**

**3a-α-Pro**

**Figure S17. Expansion of 1H-NMR (500 MHz, CDCl3) Spectrum of Transitmycin (R1)**


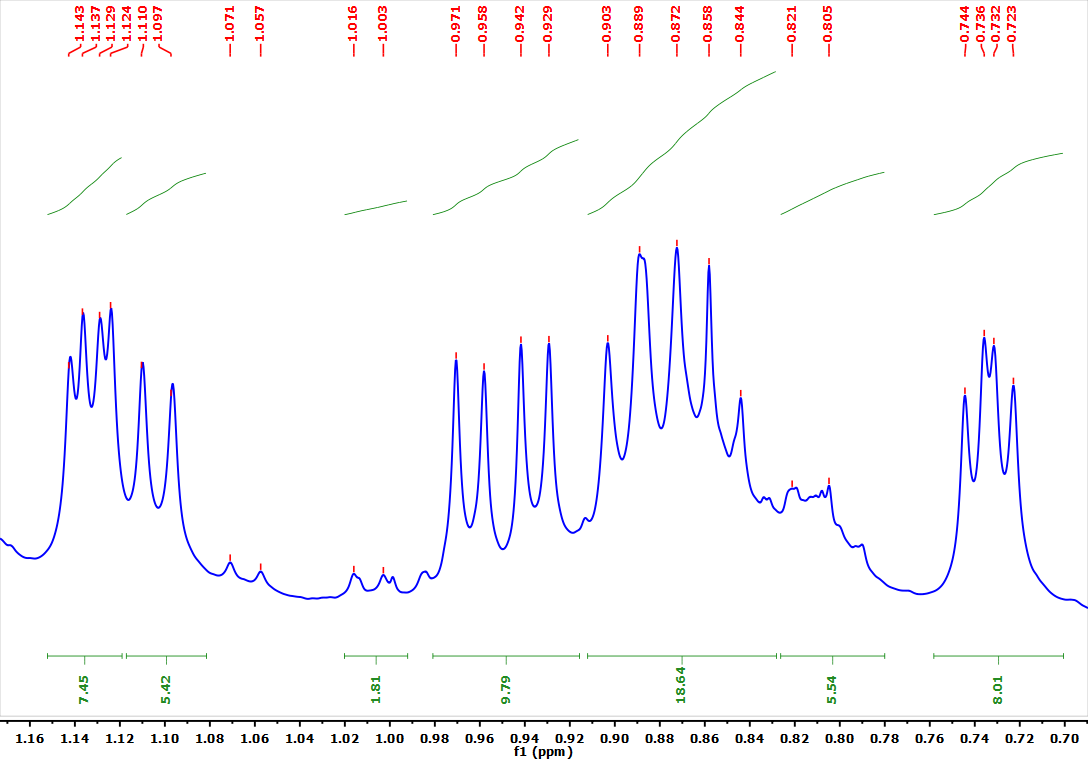


**5-β-Val**

**5-α-Val**

**4-α-Thr**

**4-α-MeVal**

**4-β-MeVal**

**4-α and 4-β- Val**

**5-β and 5α- Me Val**

**Figure S18. Expansion of 1H-NMR (500 MHz, CDCl3) Spectrum of Transitmycin (R1)**


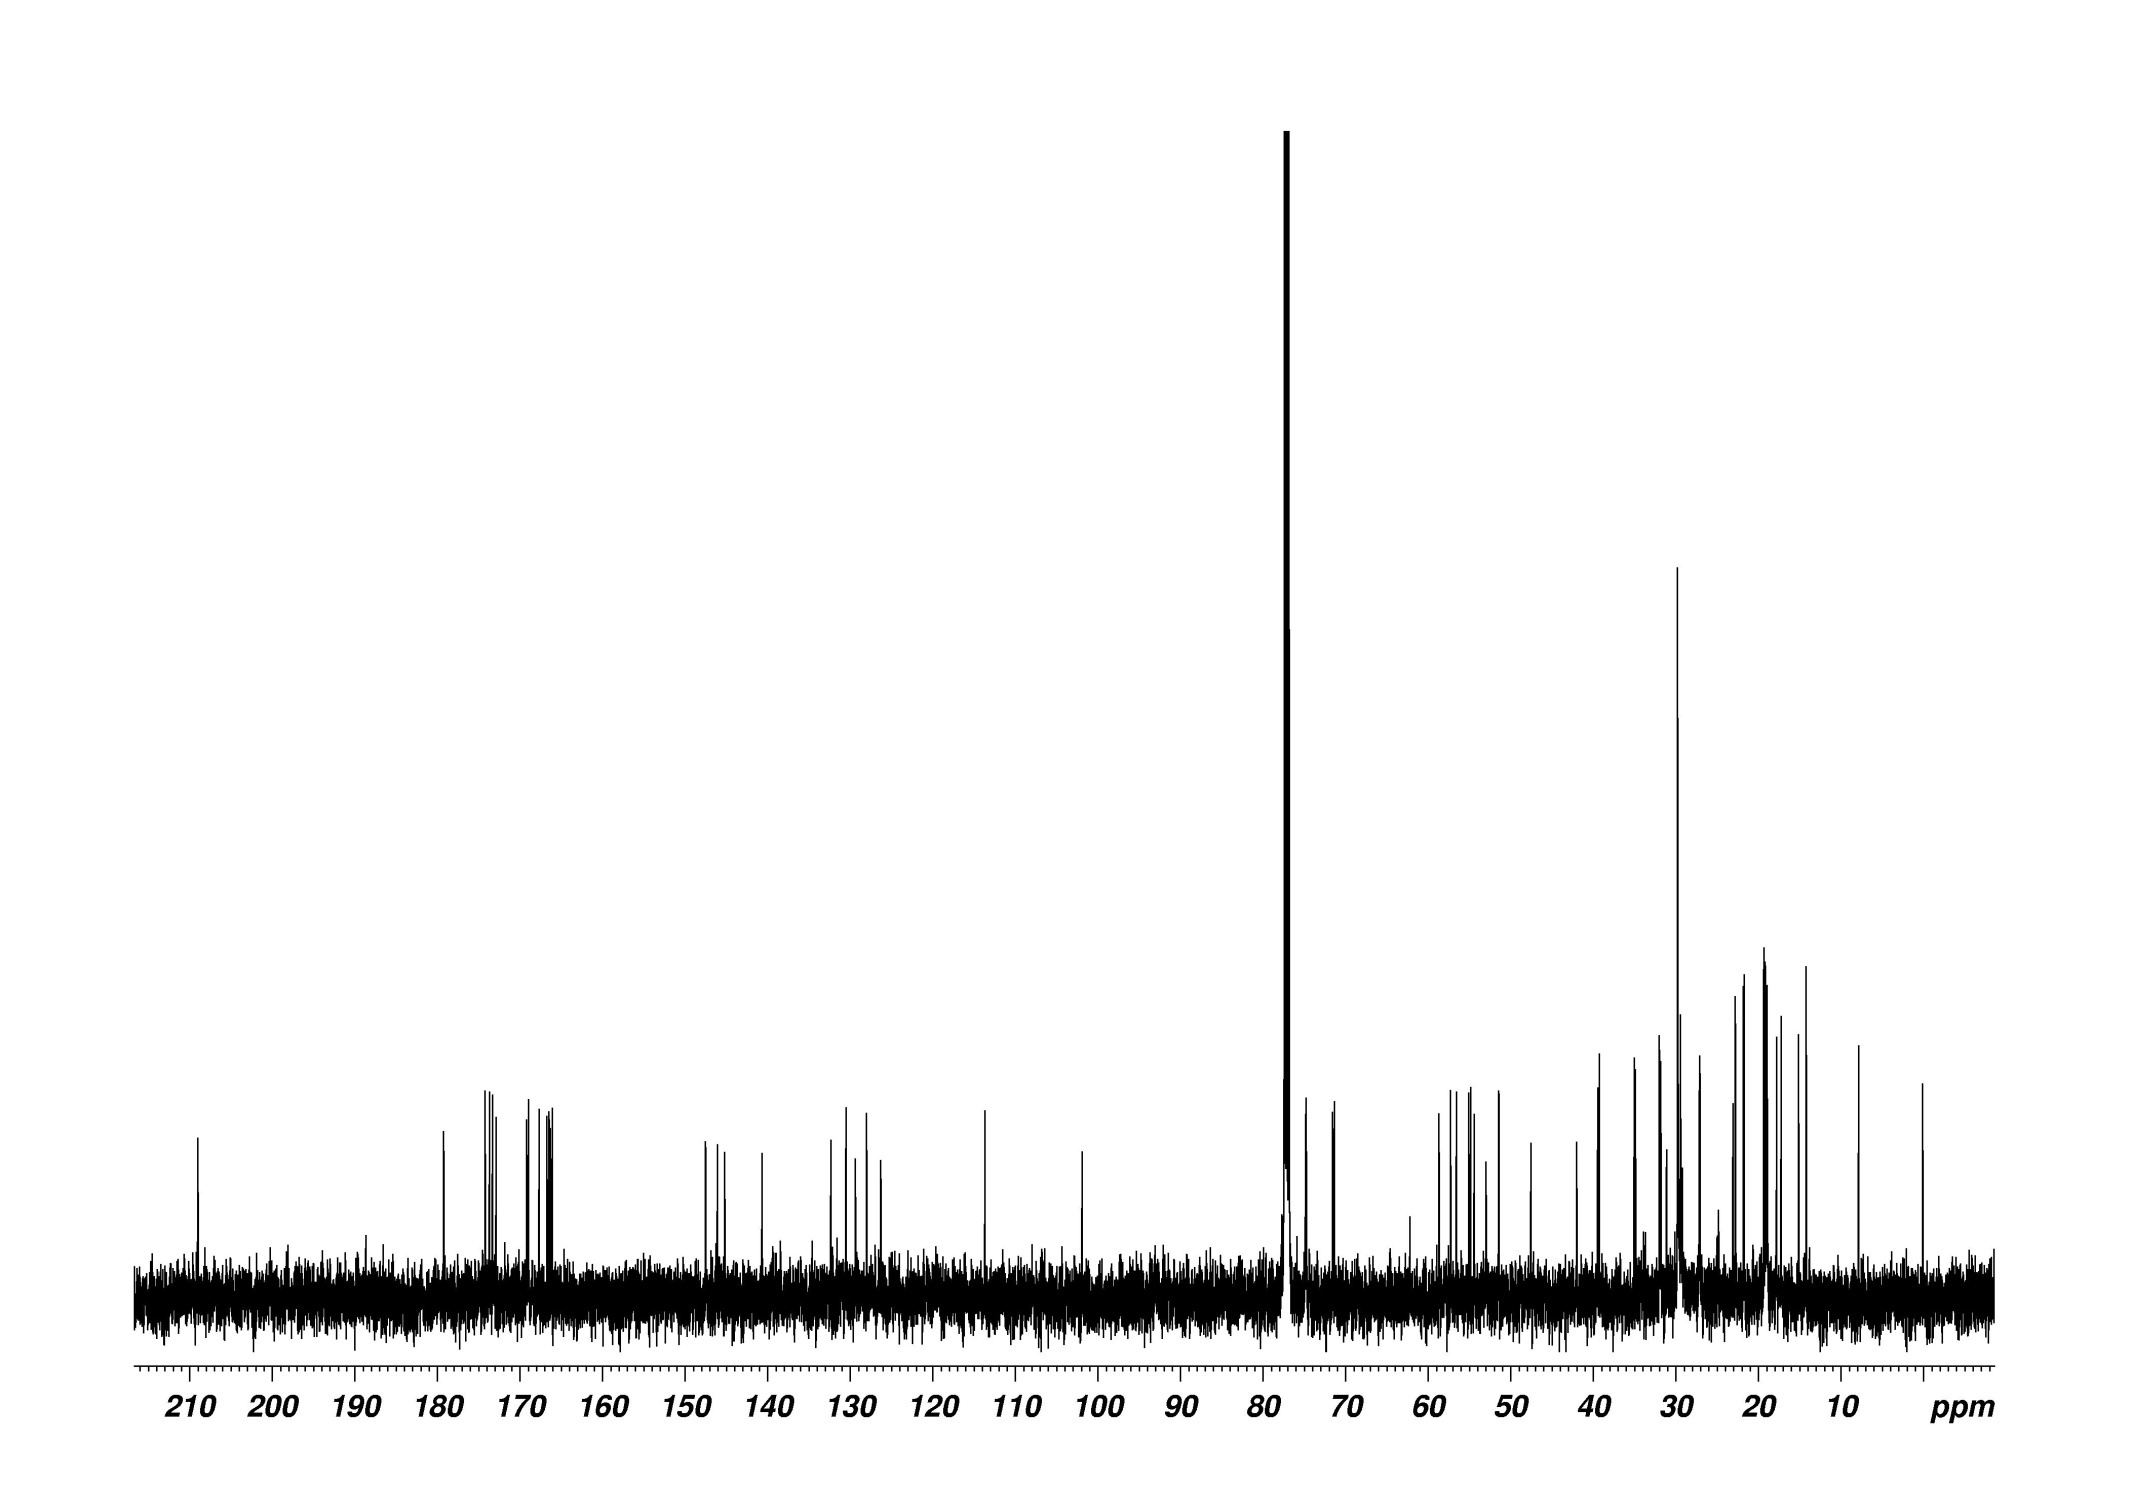

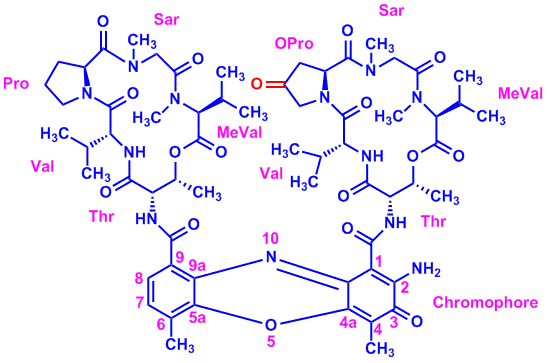

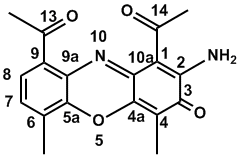


**CDCl3**

**C-1 of ChromophoreC-1 of Chromophore**

**C-4 of ChromophoreC-4 of Chromophore**

**C4-of ketoProlineC4-of ketoProline**

**C-3 of ChromophoreC-3 of Chromophore**

**10 amides and 2 esters10 amides and 2 esters**

C-11 of ChromophoreC-11 of Chromophore

C-12 of ChromophoreC-12 of Chromophore

**C-3 of ThreonineC-3 of Threonine**

**C-2 of methyl ValineC-2 of methyl Valine**

**N- Methyl methylValineN- Methyl methylValine**

**N- Methyl SarcosineN- Methyl Sarcosine**

**C3-of ketoProlineC3-of ketoProline**

**Chromophore**

**Figure S19. 13C-NMR (125 MHz, CDCl3) Spectrum of Transitmycin (R1)**


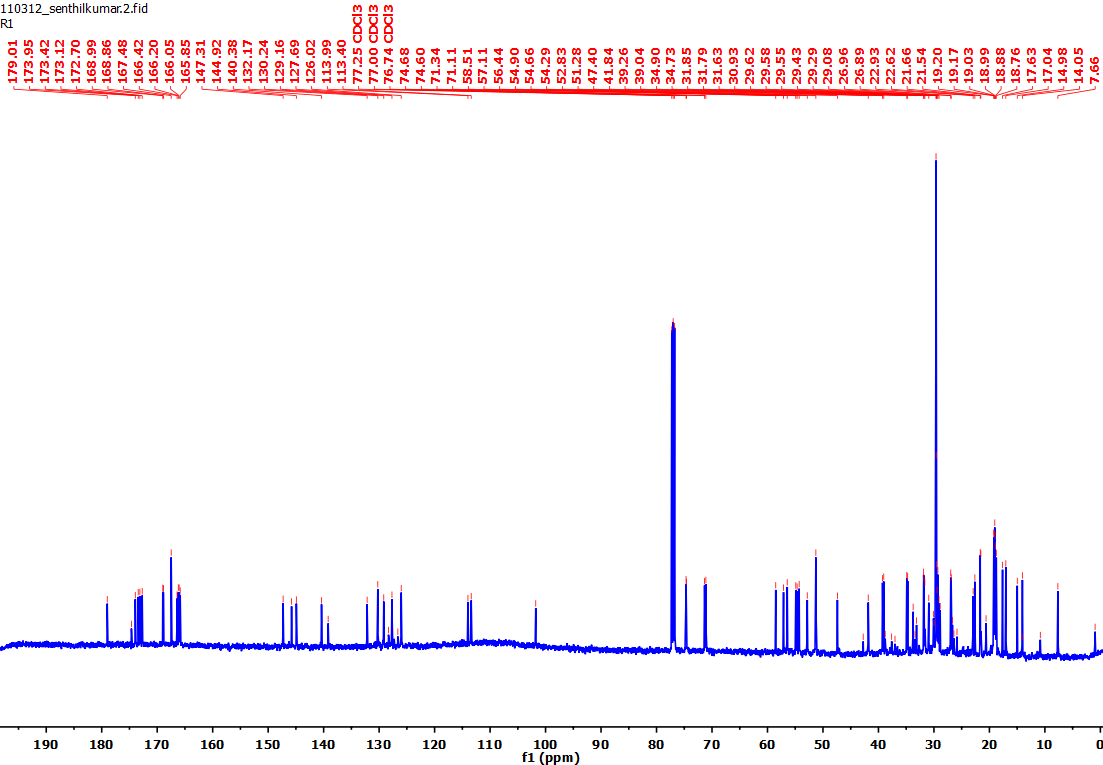


**
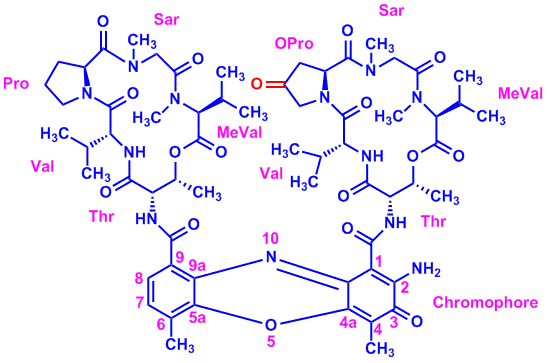
**

**Figure S20. 13C-NMR (125 MHz, CDCl3) Spectrum of Transitmycin (R1)**


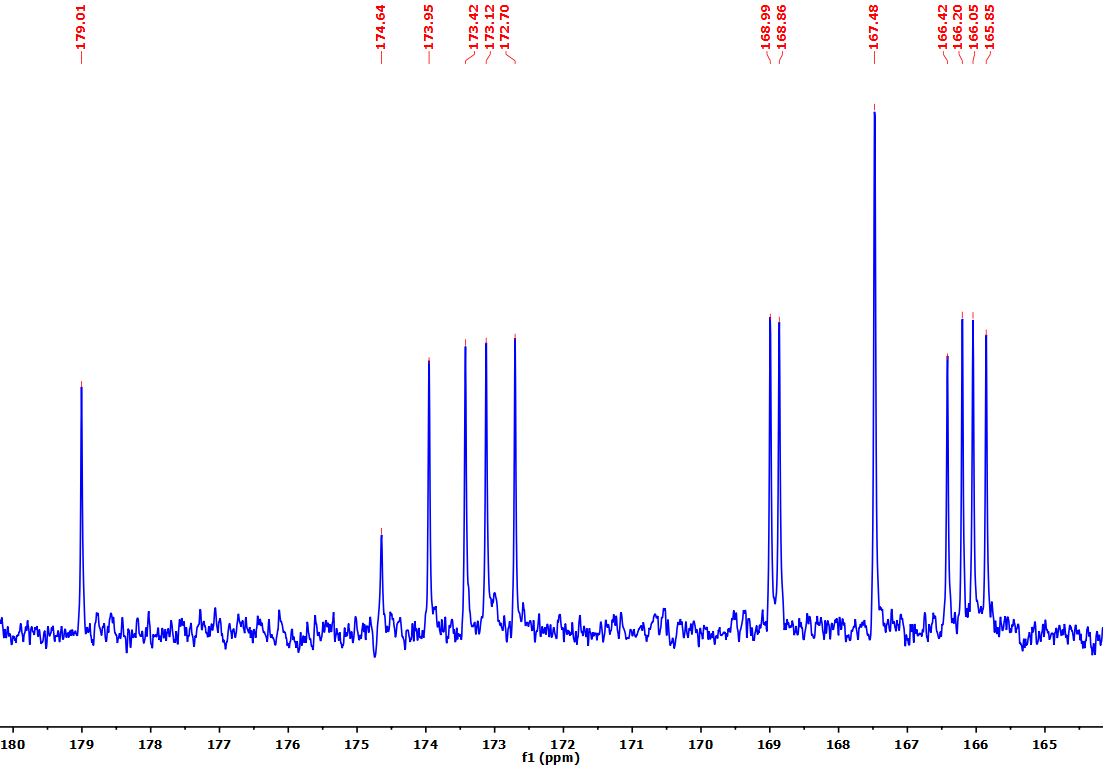


**3-Chromophore**

**1-β-Oxo-Pro**

**1-β-Thr**

**1-α-Thr**

**1-α, 1-β-MeVal**

**1-α-Pro**

**1-α-Val**

**1-β-Val**

**Figure S21. 13C-NMR (125 MHz, CDCl3) Spectrum of Transitmycin (R1)**


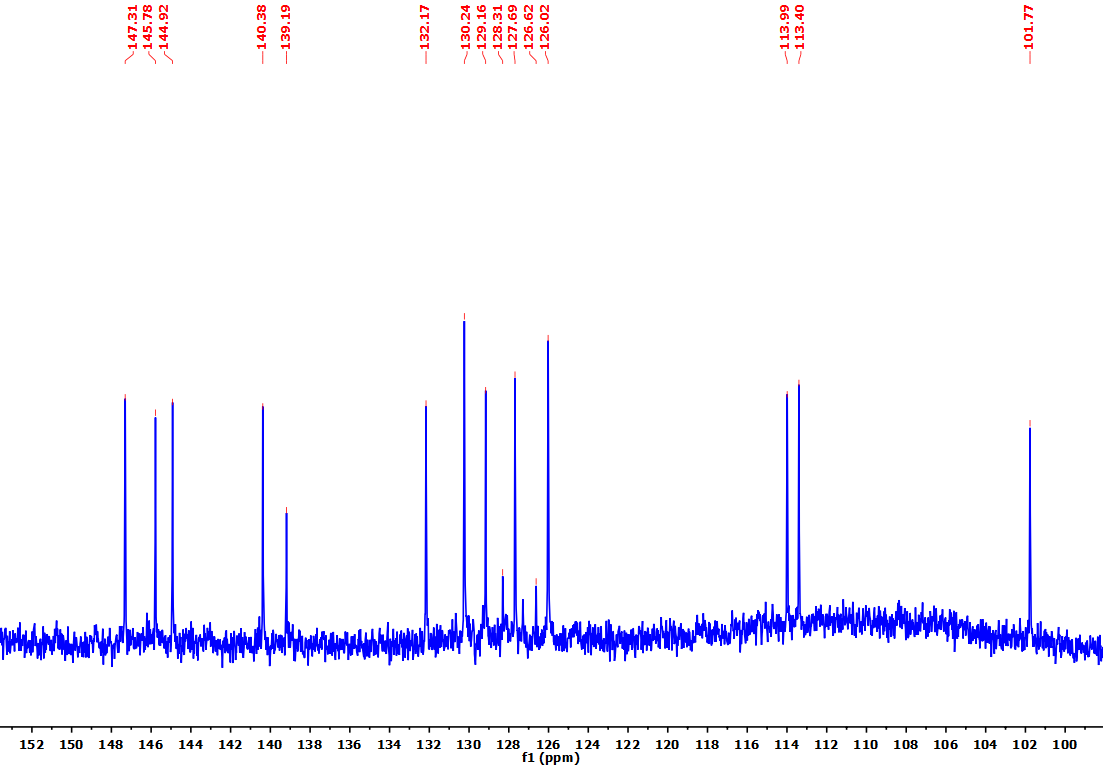


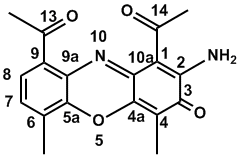


**7-Chromophore**

**9-Chromophore**

**2-Chromophore**

**1-Chromophore**

4**-Chromophore**

**5a Chromophore**

**4a-Chromophore**

**8-Chromophore**

**6-Chromophore**

**9a-Chromophore**

**Figure S22. 13C-NMR (125 MHz, CDCl3) Spectrum of Transitmycin (R1)**


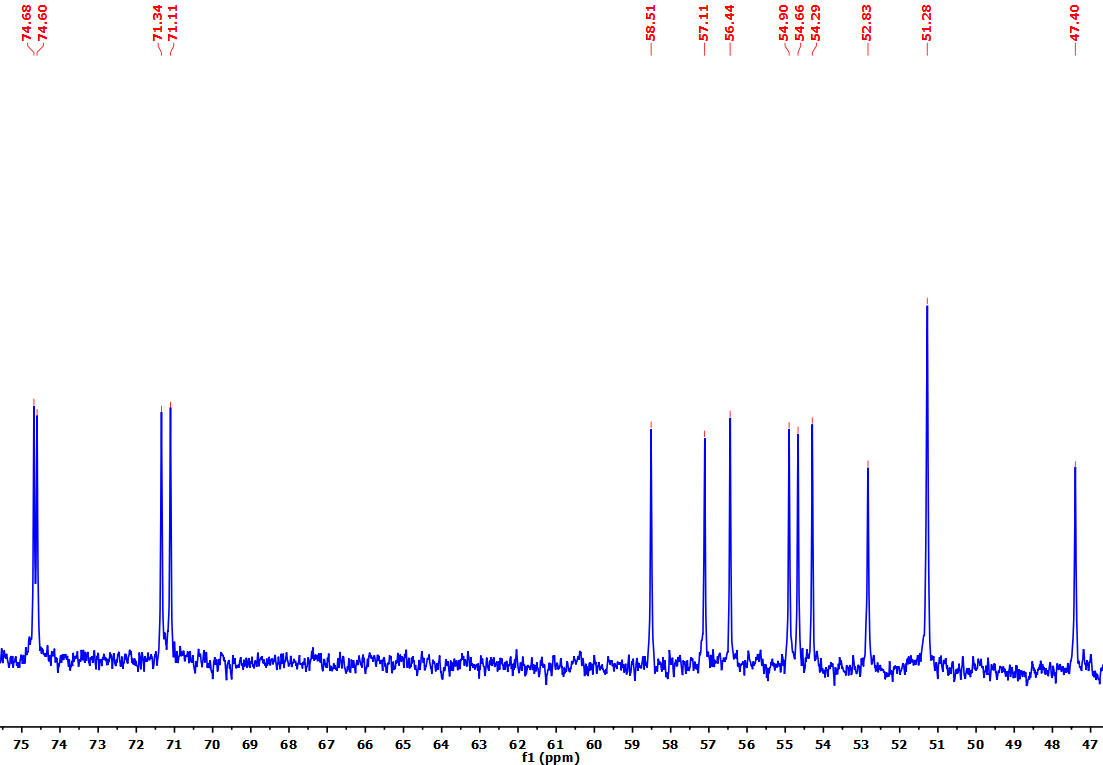


**3-α, 3β-Thr**

**2α, 2β- MeVa**l

**2α-Val**

**2β-Val**

**2-β-Thr**

**2-α-Thr**

**2-β-Oxo-Pro**

**2α, 2β-Sar**

**5-Pro**

**2-α-Pro**

**Figure S23. 13C-NMR (125 MHz, CDCl3) Spectrum of Transitmycin (R1)**


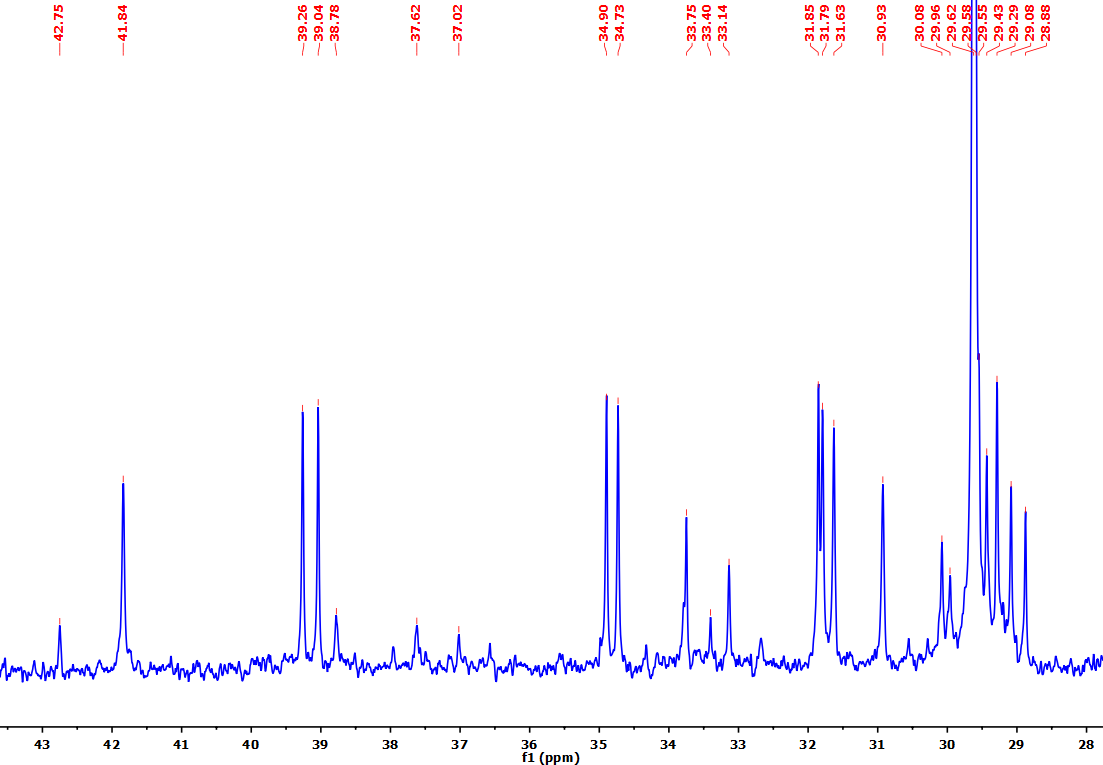


**3--β-Oxo-Proline**

**α, β,-NMe of MeVal**

α , β-N-Me of Sar

**3-β-, 3α-Val**

**Figure S24. 13C-NMR (125 MHz, CDCl3) Spectrum of Transitmycin (R1)**


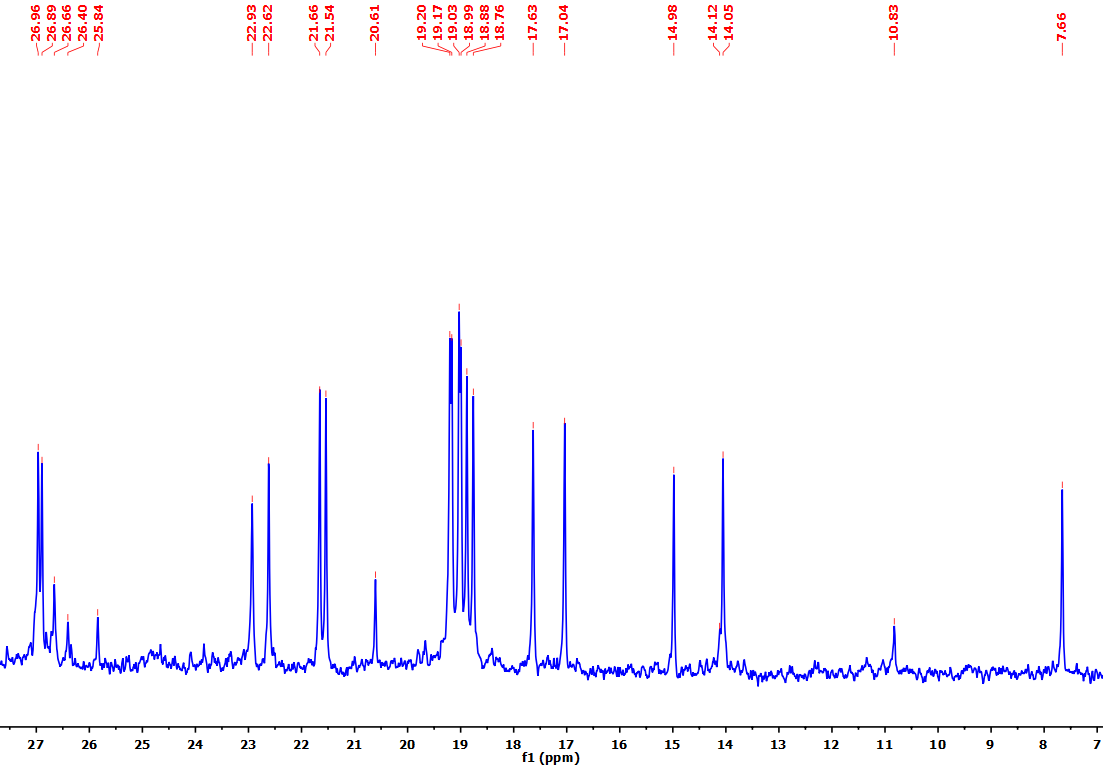


**3-α, 3β-Meval**

**3-α-Pro**

**4α, 4β-MeVal**

**5α, 5β-MeVal**

**4α, 4β-Val**

**5α, 5β-Val**

**4β-Thr**

**4-α-Thr**

**11-Chromophore**

**12-Chromophore**

**Figure S25. 13C-NMR (125 MHz, CDCl3) Spectrum of Transitmycin (R1)**

**
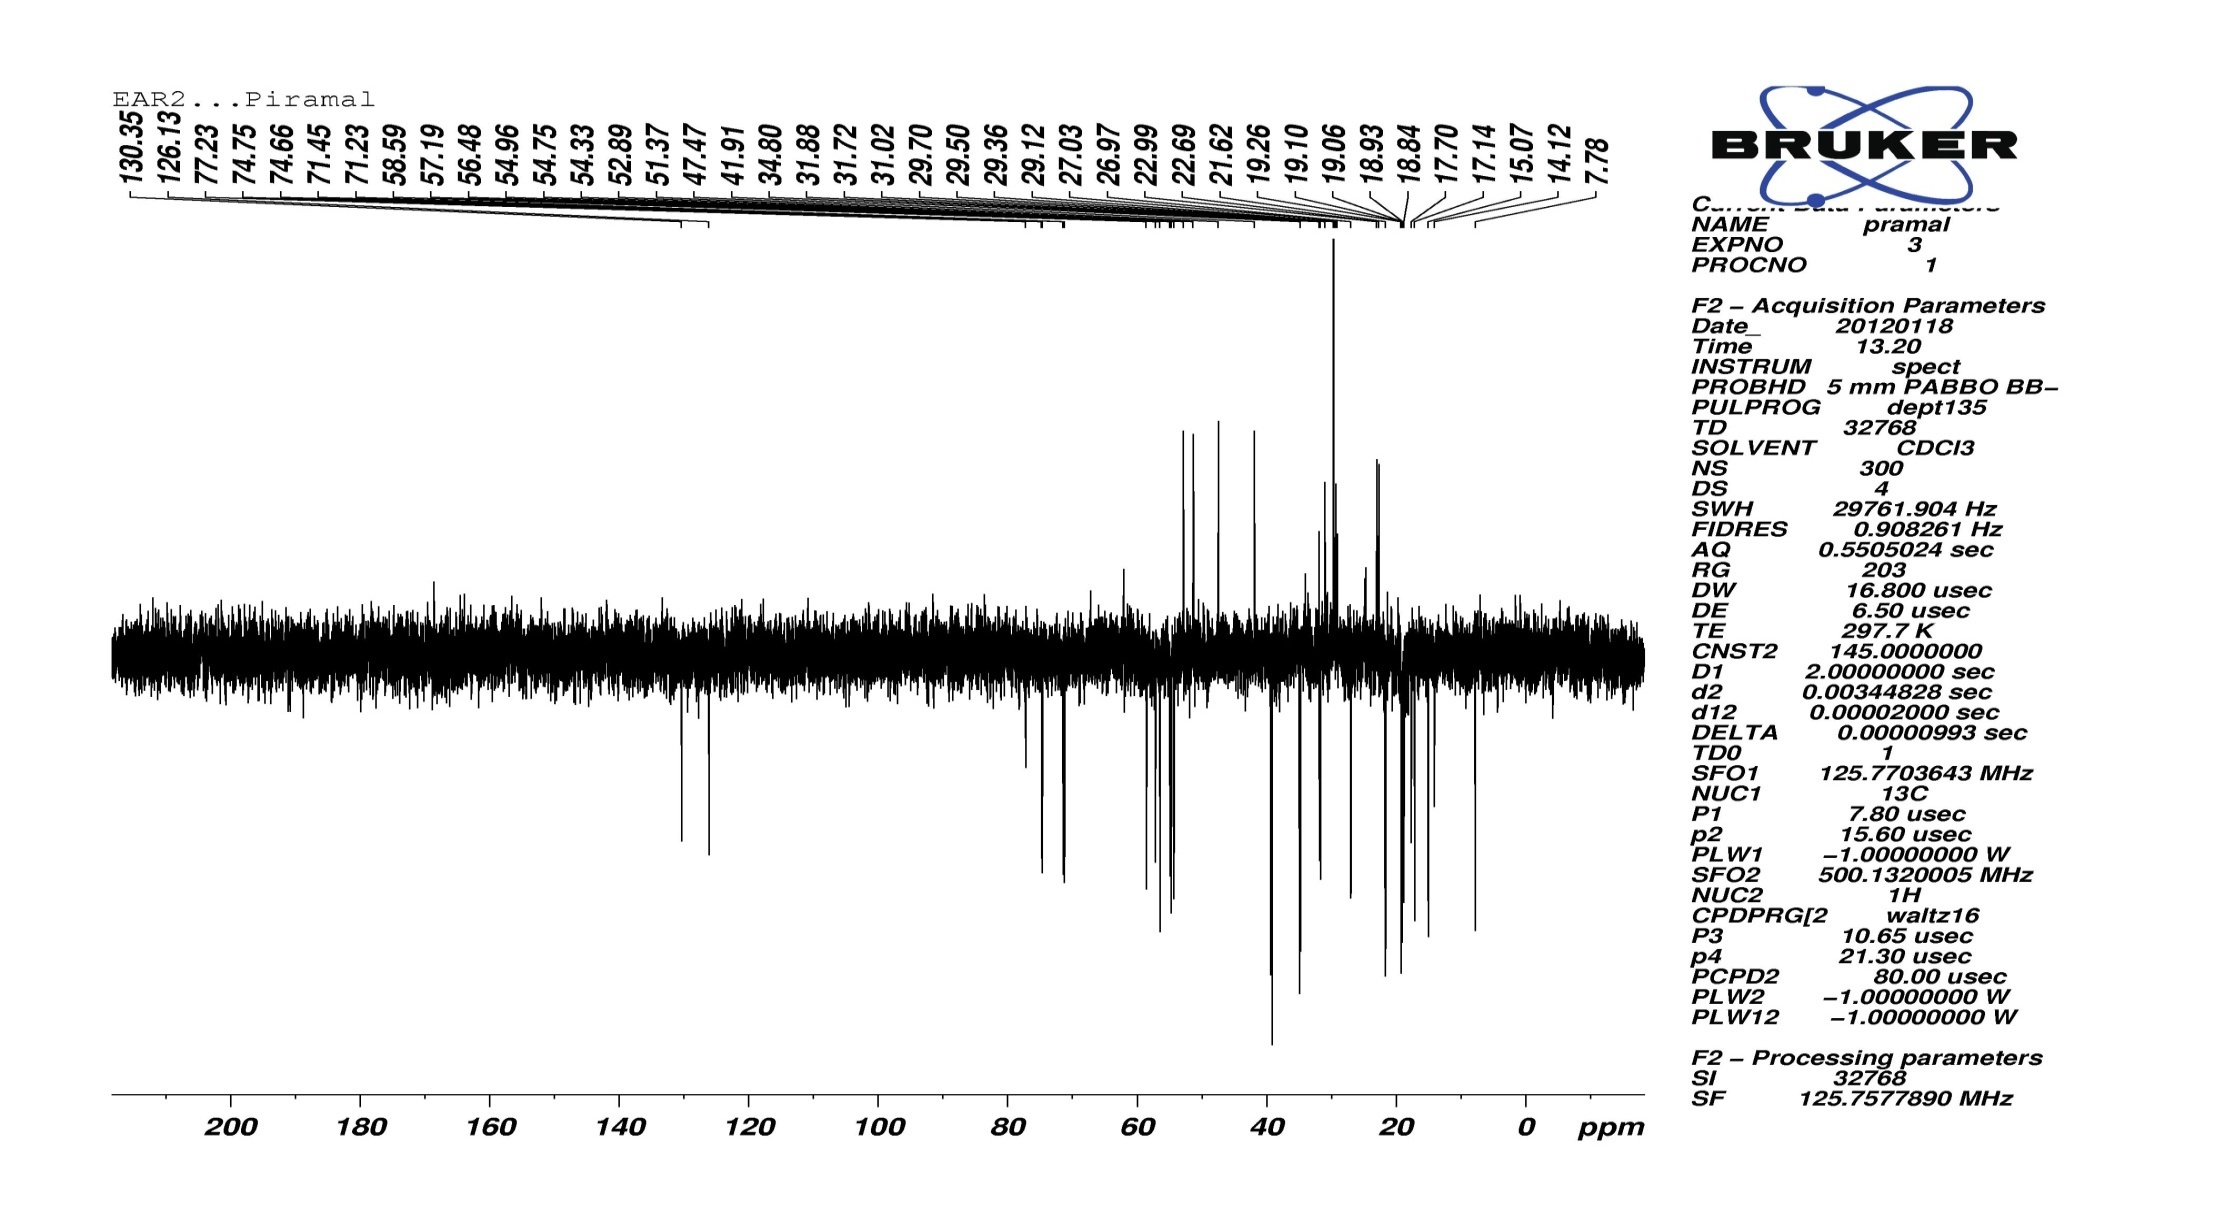
**


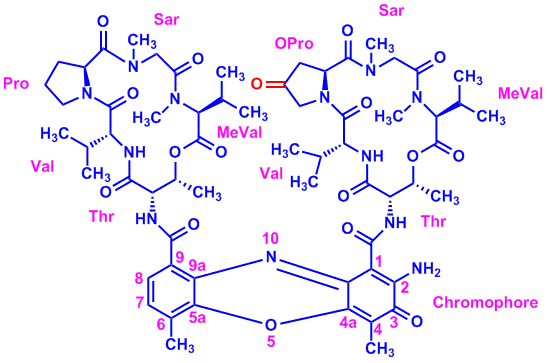


**Figure S26. DEPT135 (125 MHz, CDCl3) Spectrum of Transitmycin (R1)**


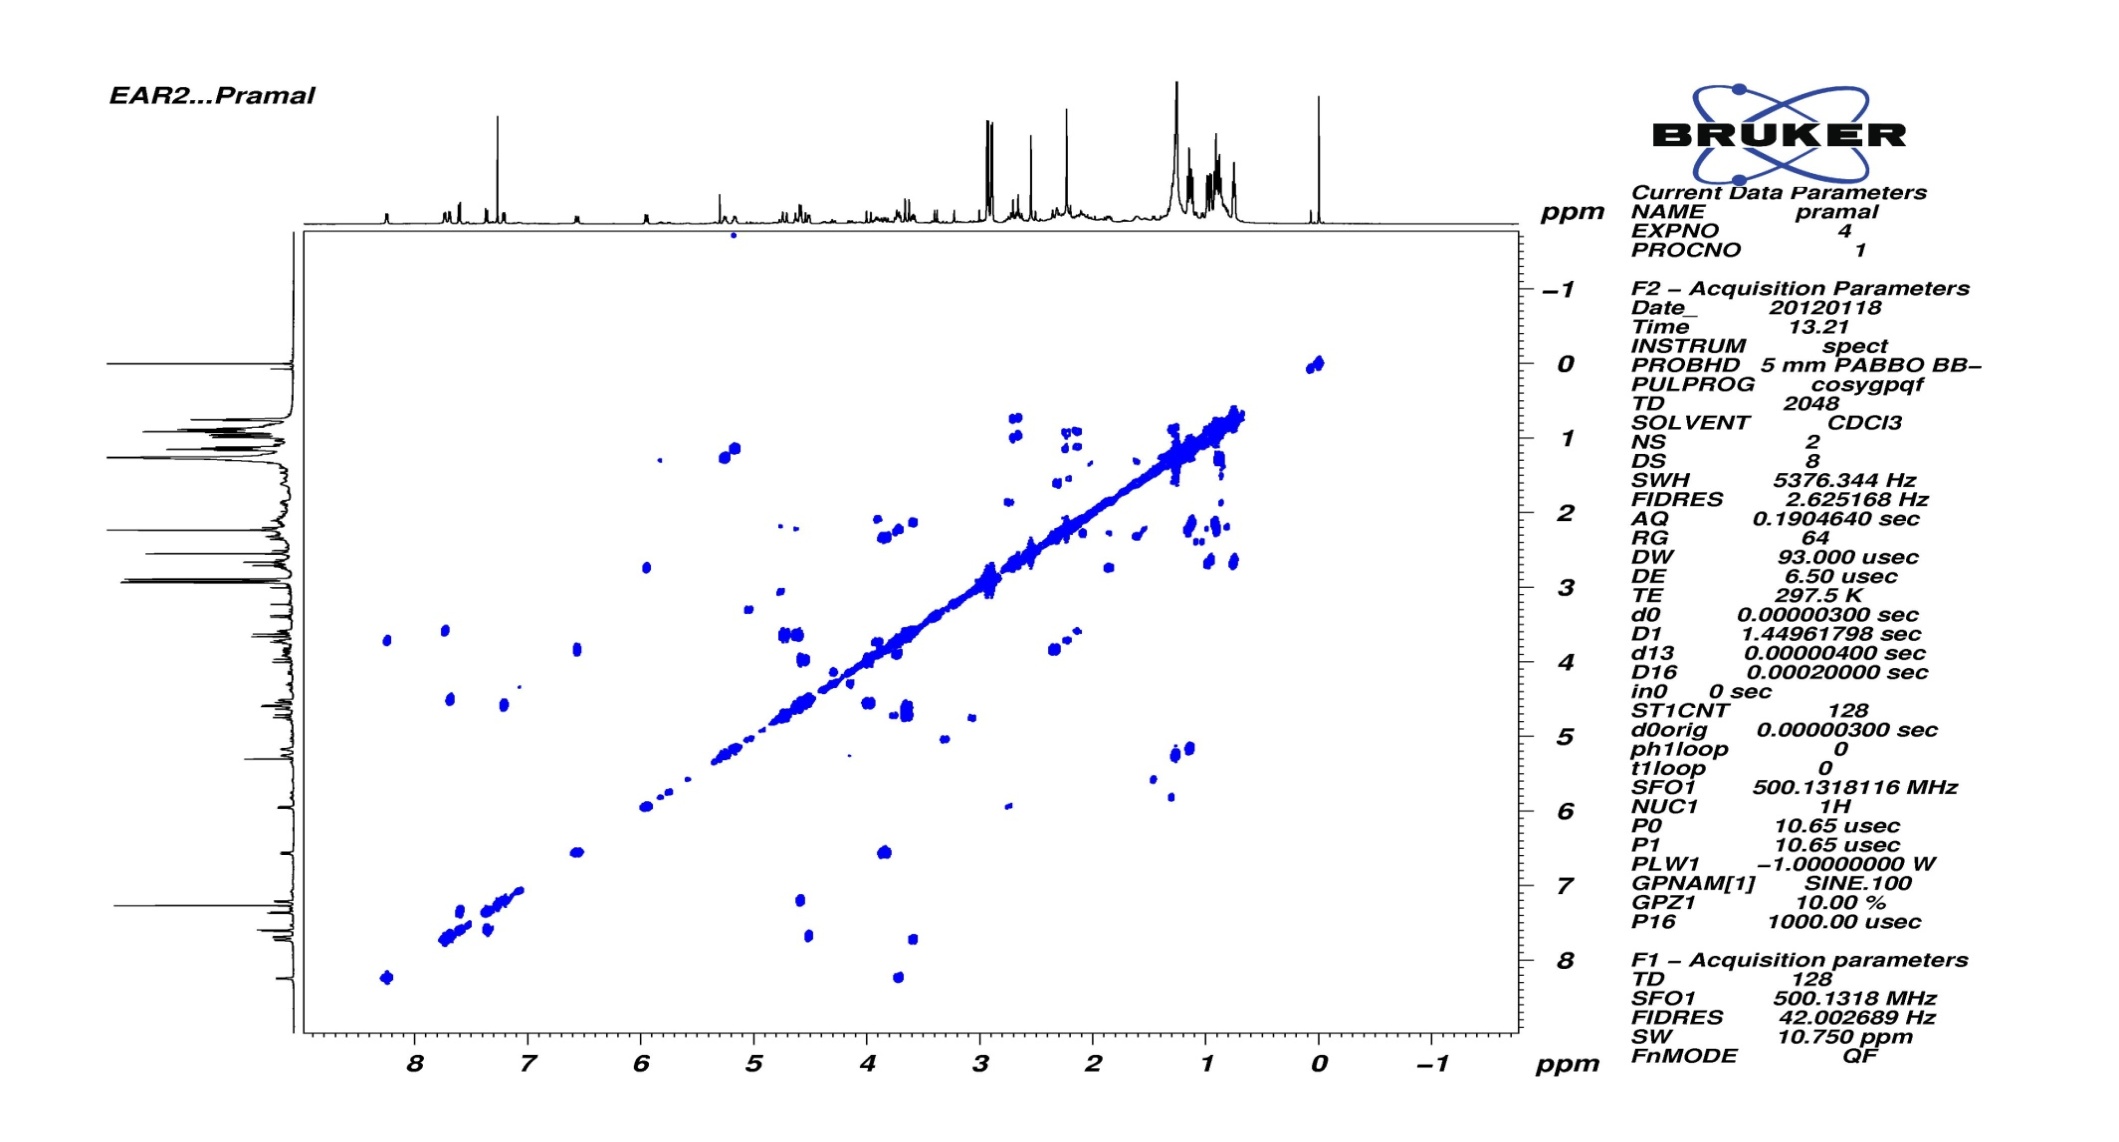

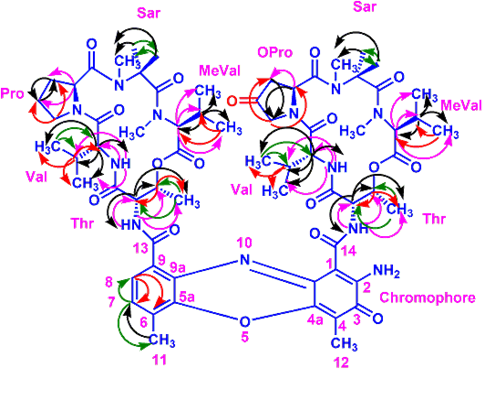


**Figure S27. COSY (500 MHz, CDCl3) Spectrum of Transitmycin (R1)**

**
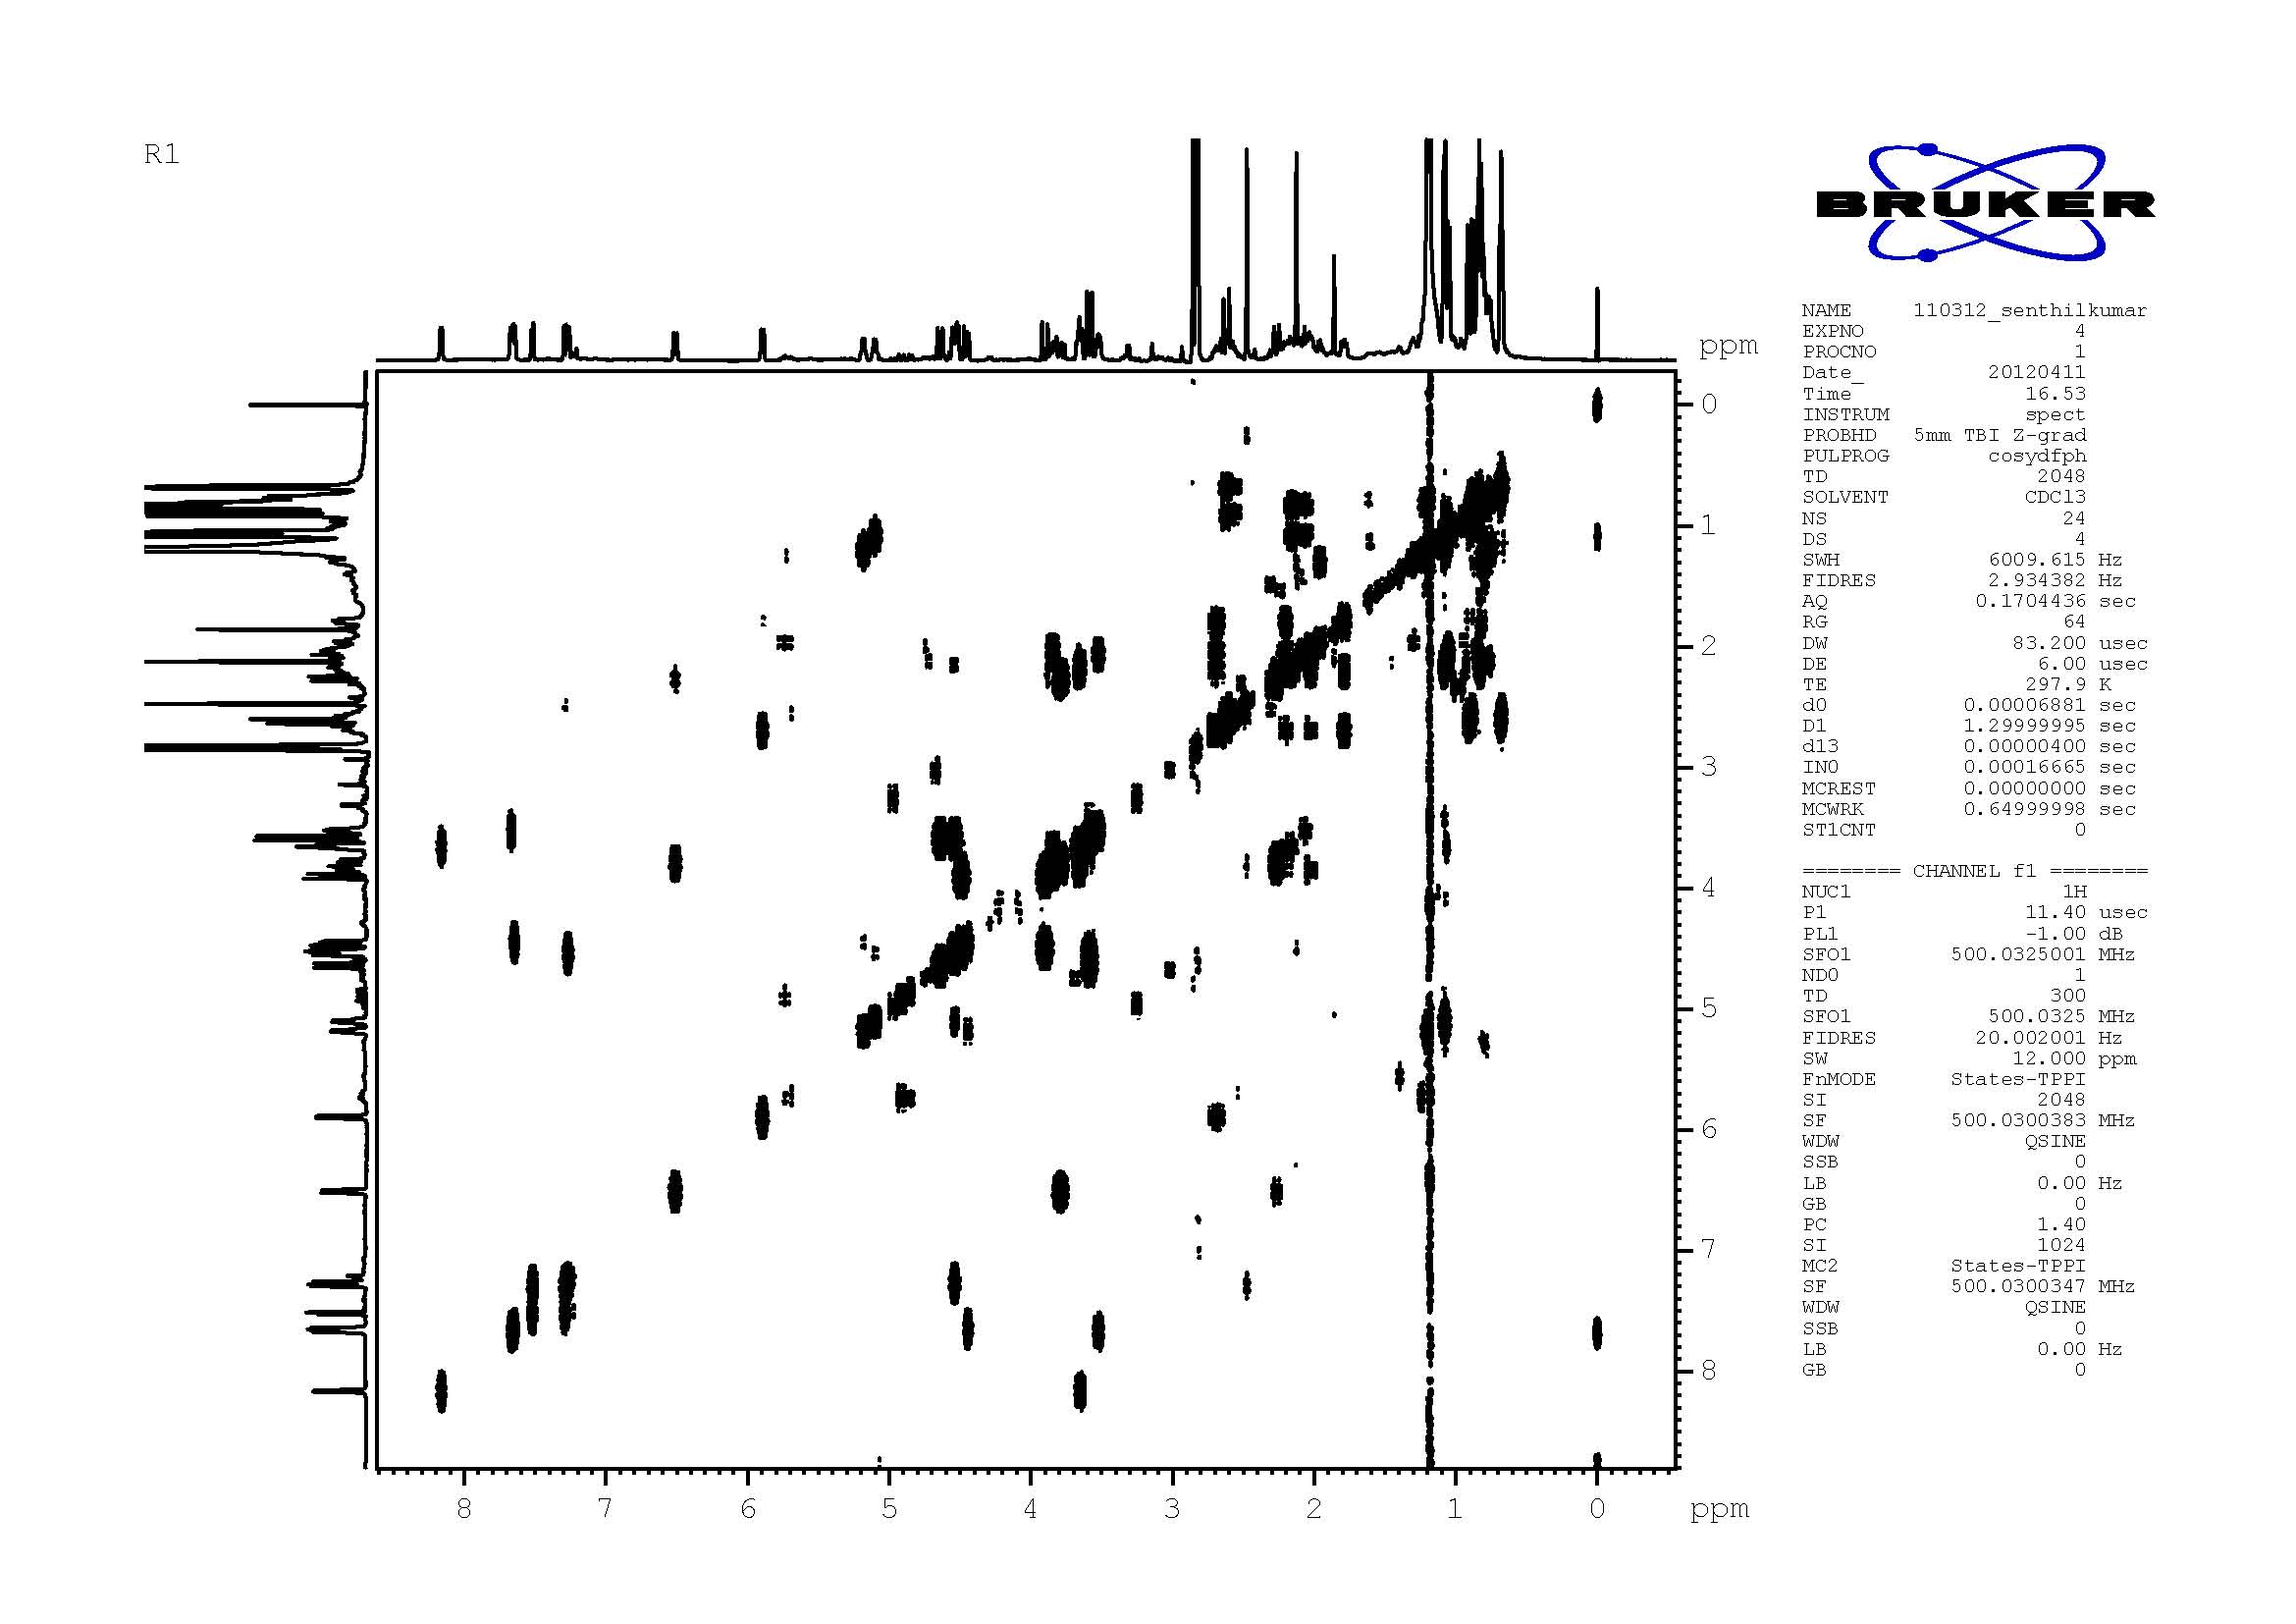

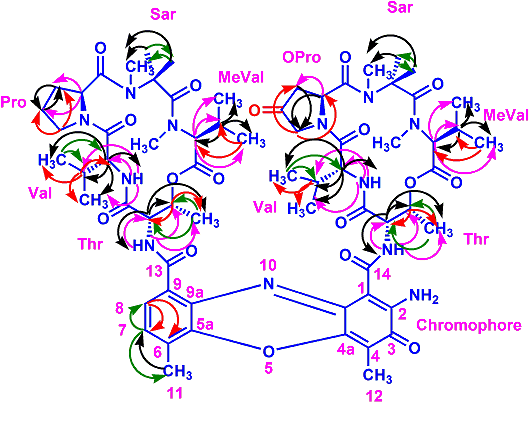
**

**Figure S28. DQF-COSY (500 MHz, CDCl3) Spectrum of Transitmycin (R1)**

**
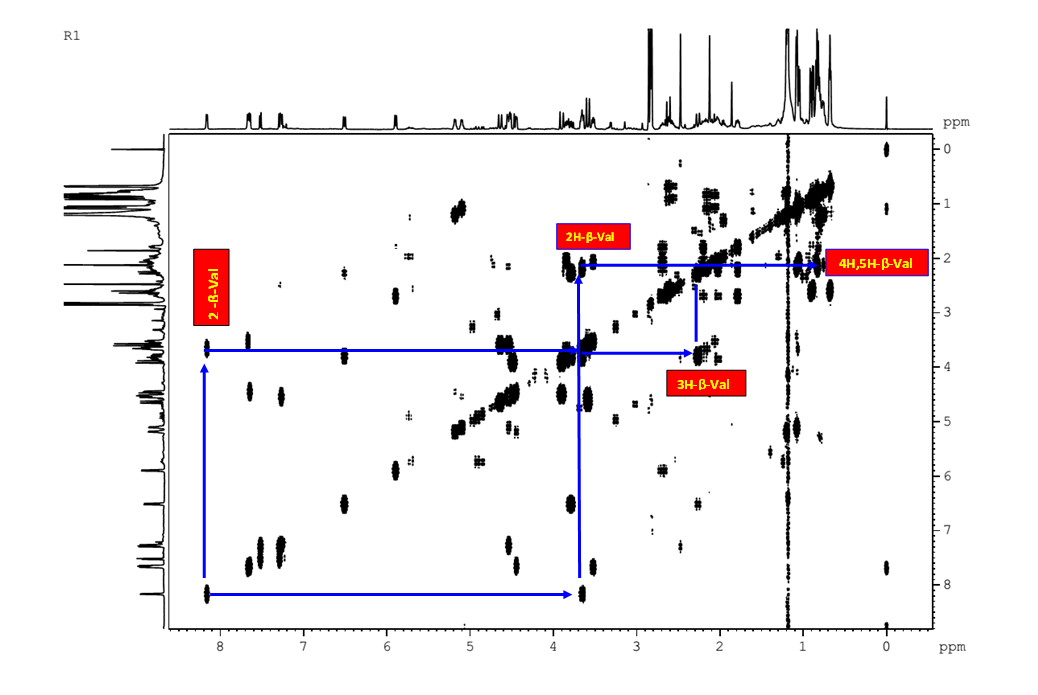

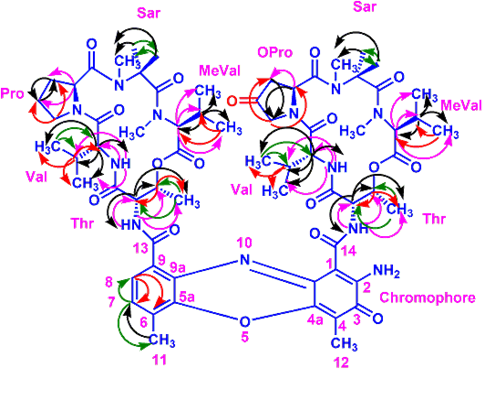
**

**Figure S29. Expansion of DQF-COSY (500 MHz) Spectrum of Transitmycin (R1)**


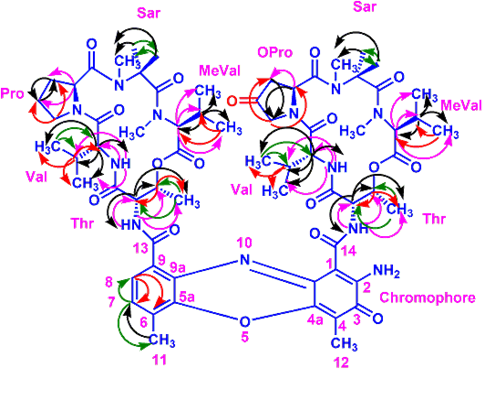

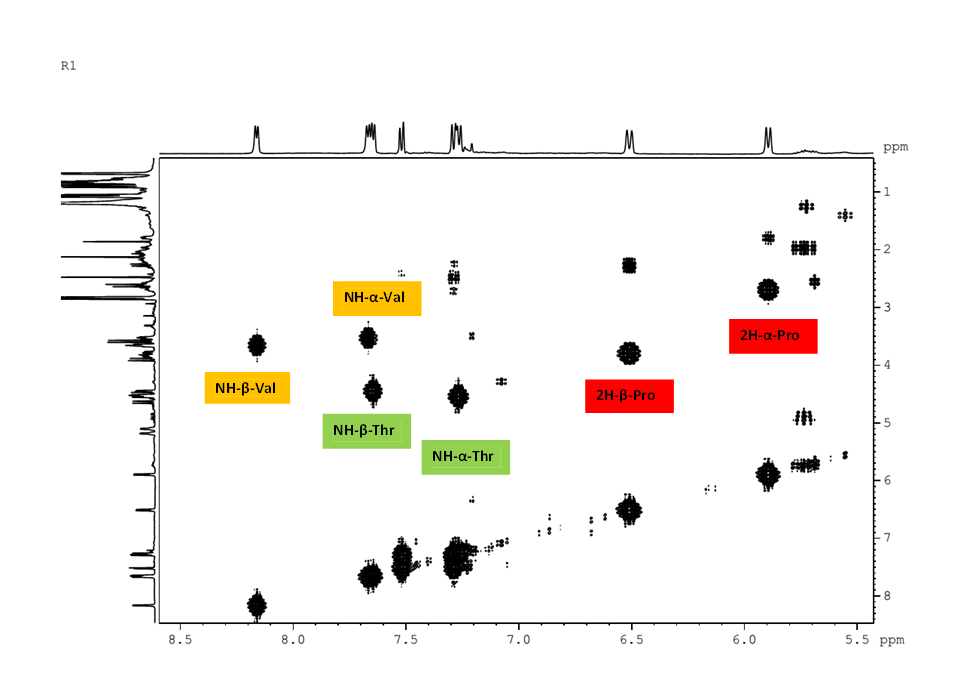


**Figure S30. Expansion of DQF-COSY (500 MHz) Spectrum of Transitmycin (R1)**


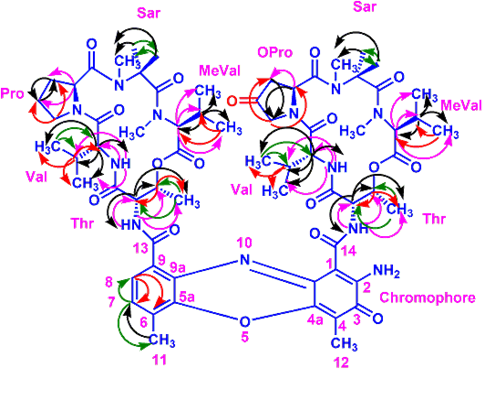

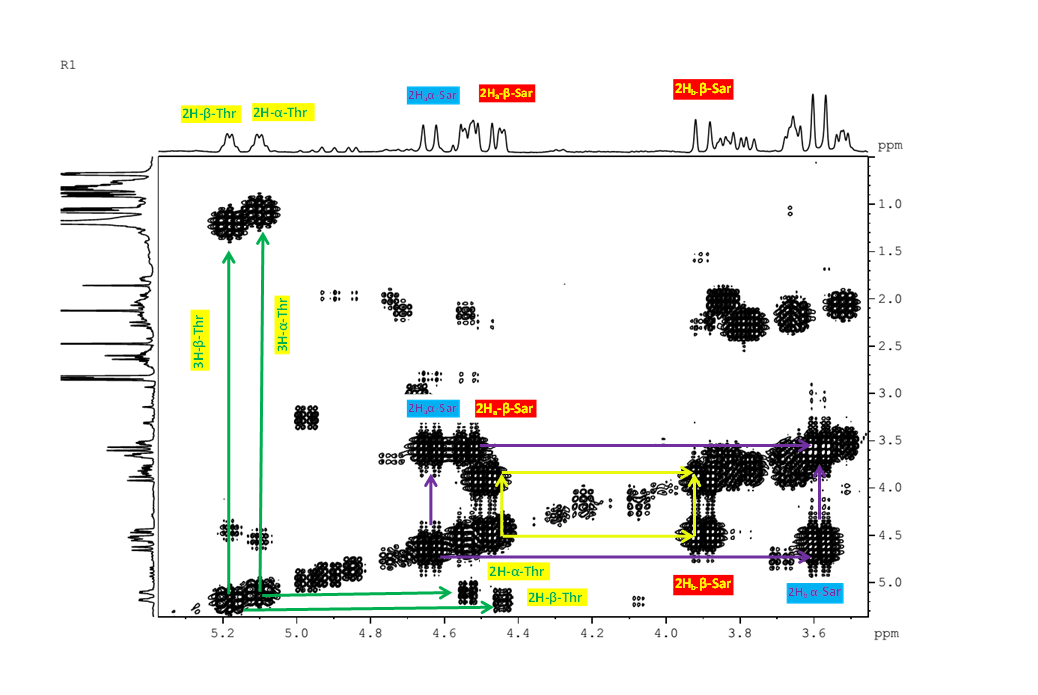


**Figure S31. Expansion of DQF-COSY (500 MHz) Spectrum of Transitmycin (R1)**


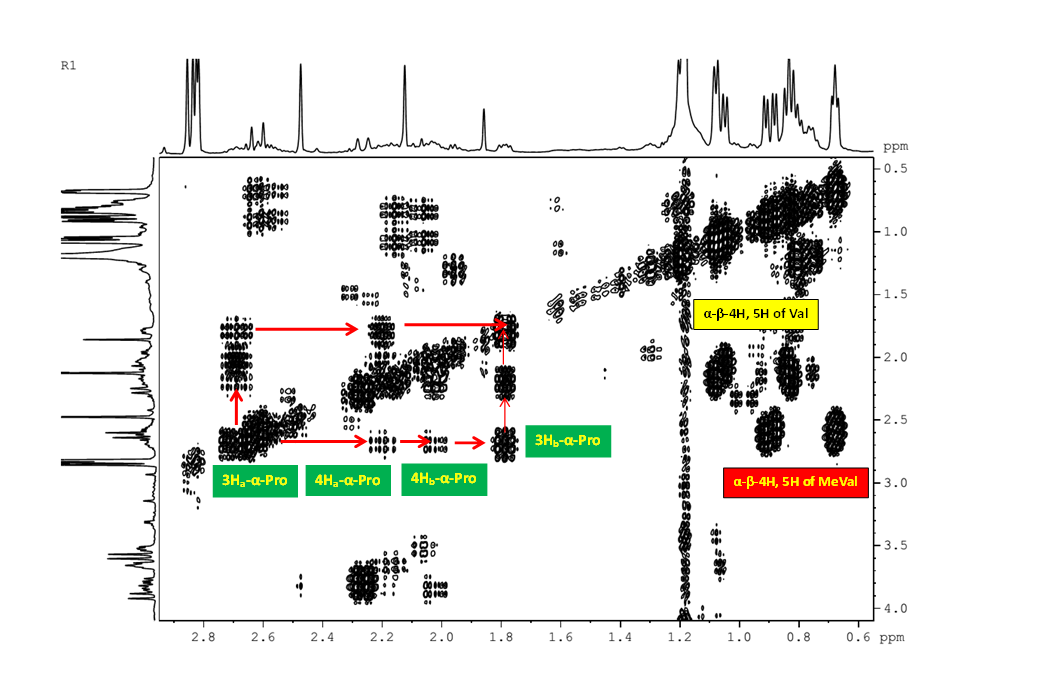

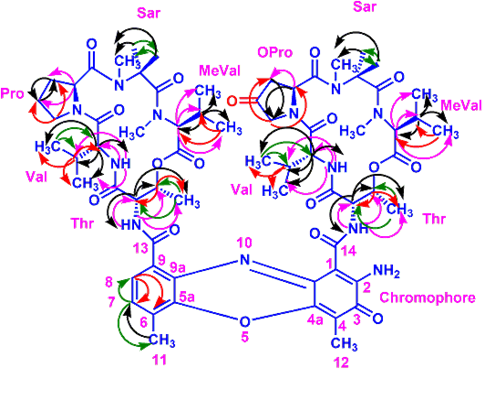


**Figure S32. Expansion of DQF-COSY (500 MHz) Spectrum of Transitmycin (R1)**

**
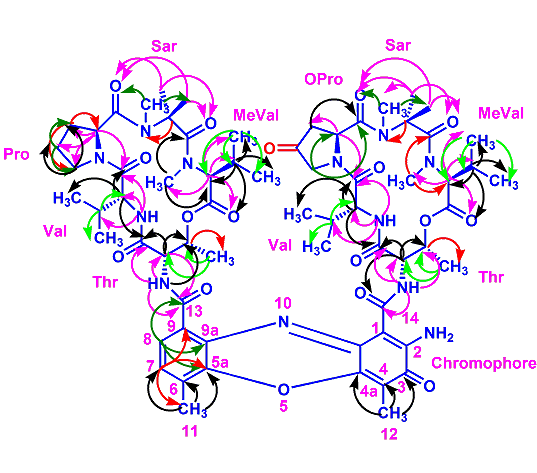

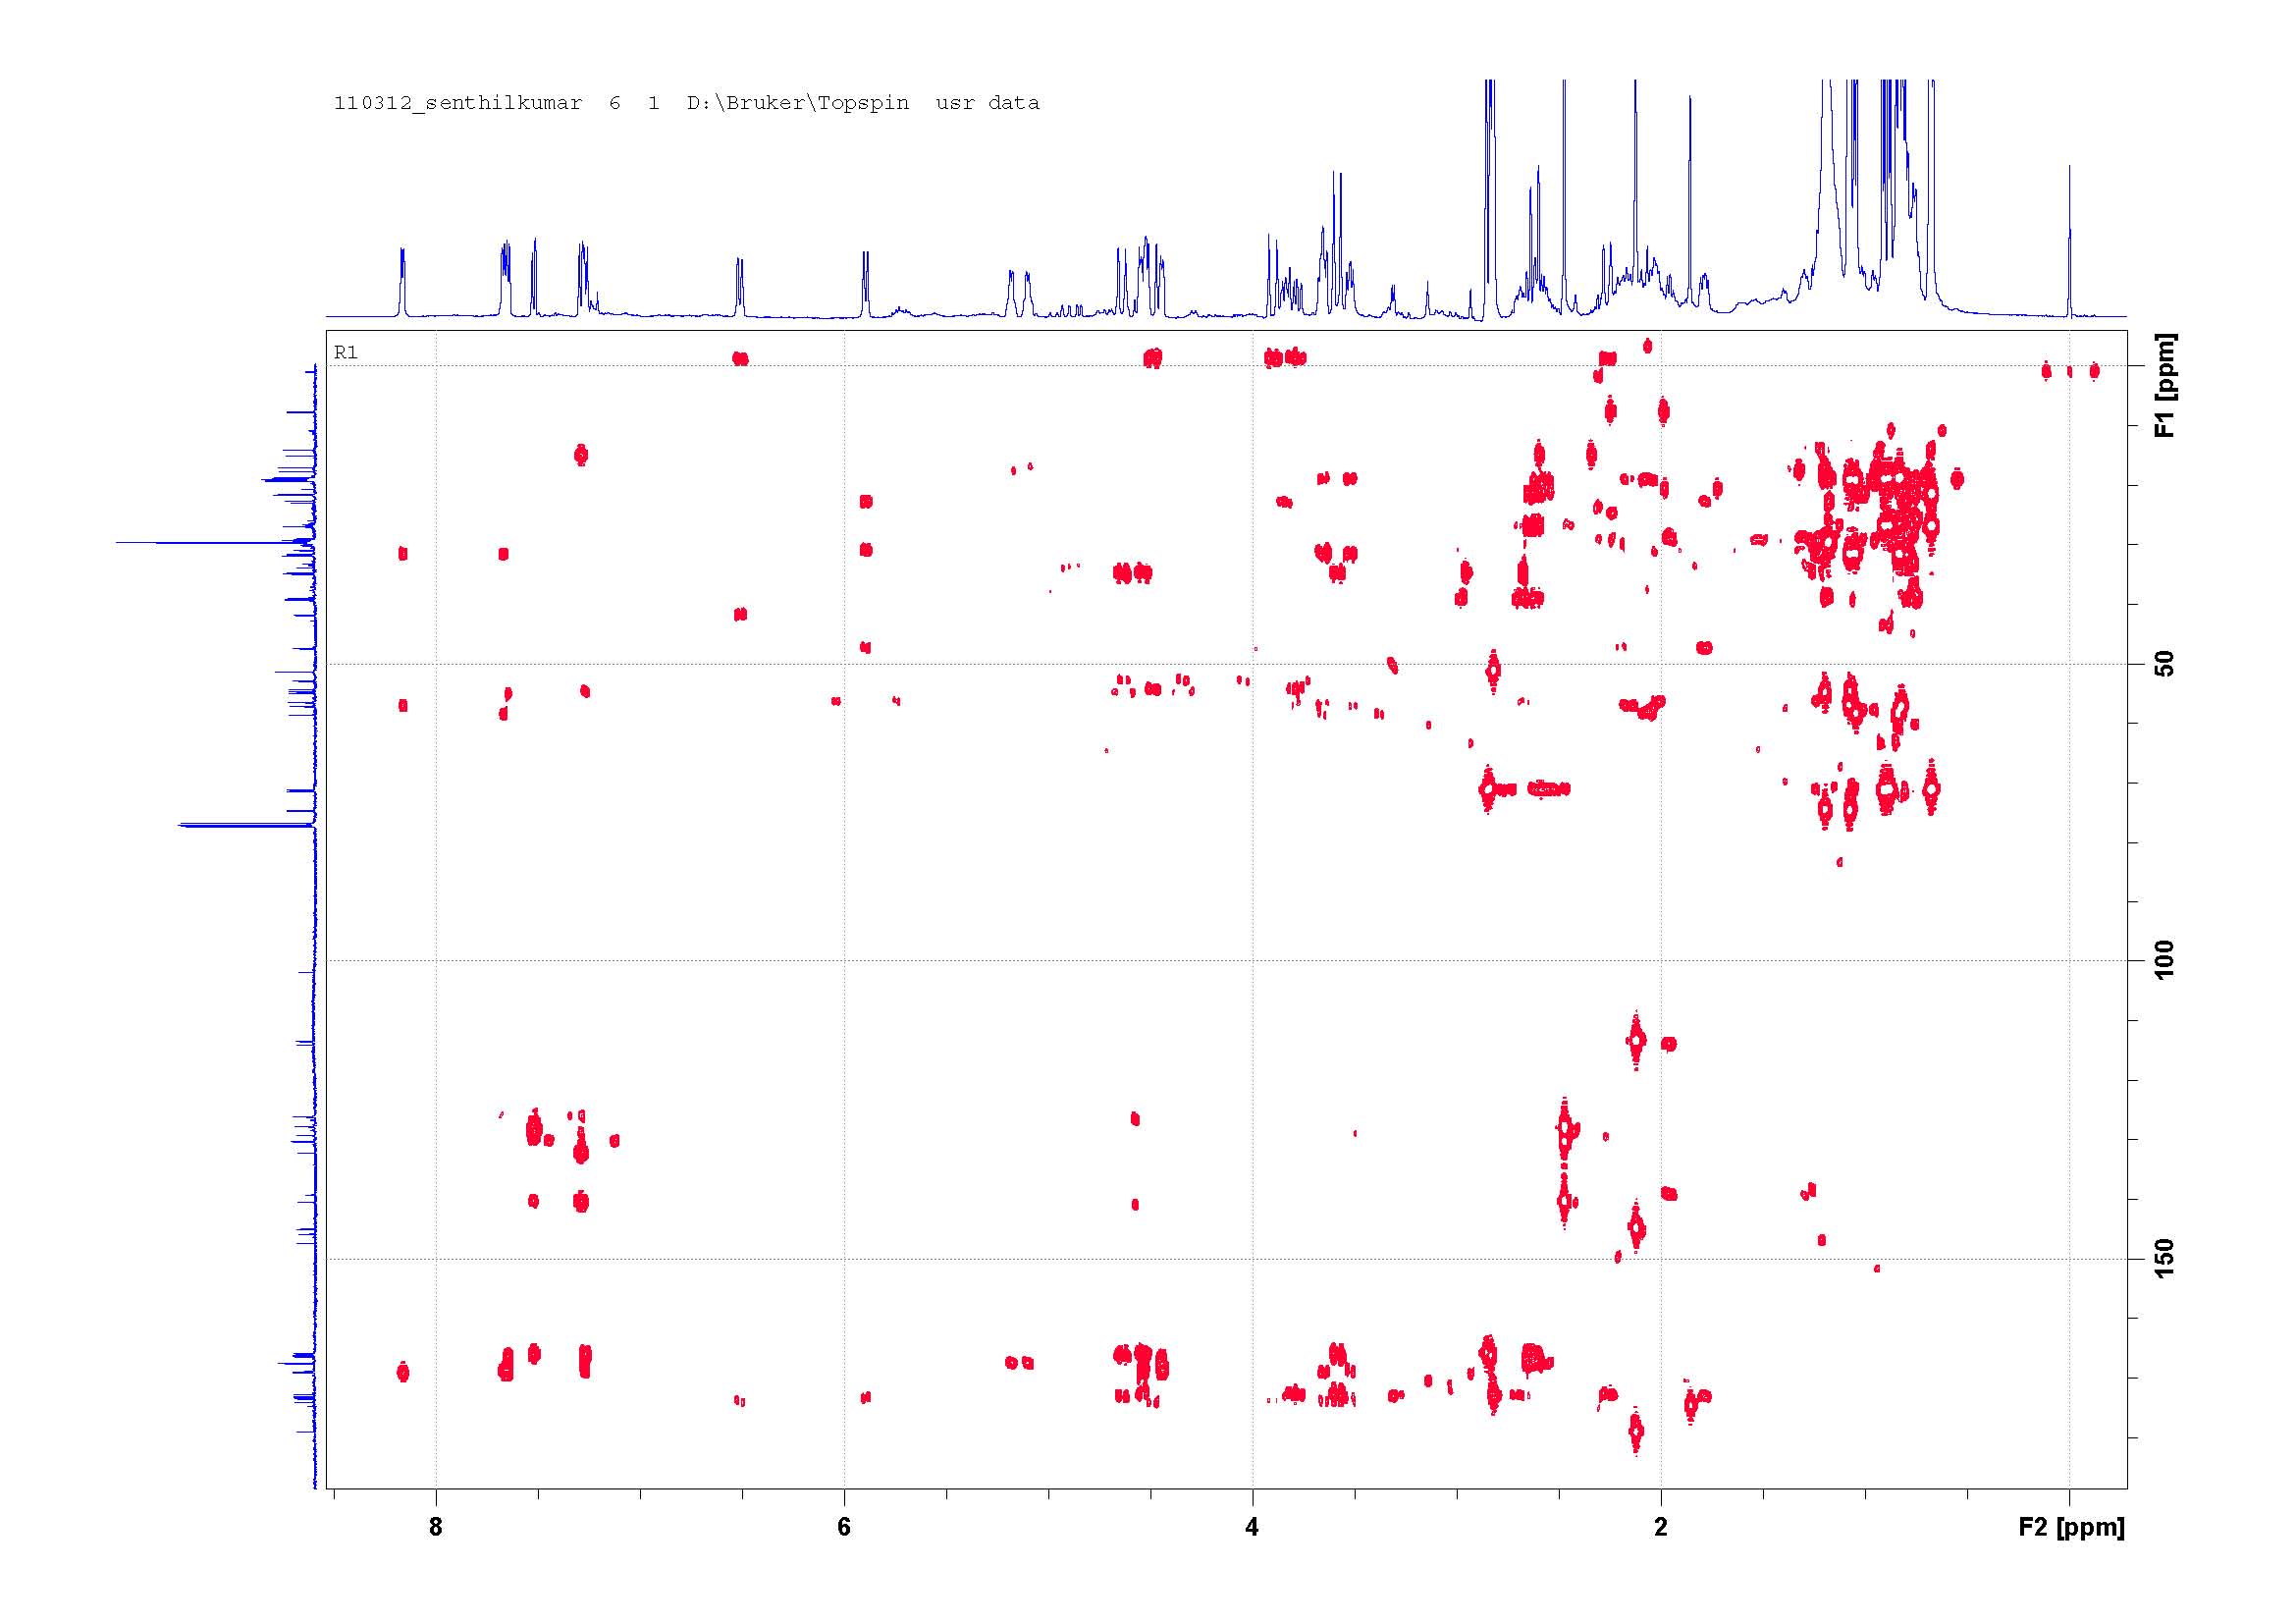
**

**Figure 33. HMBC (500 MHz) Spectrum of Transitmycin (R1)**


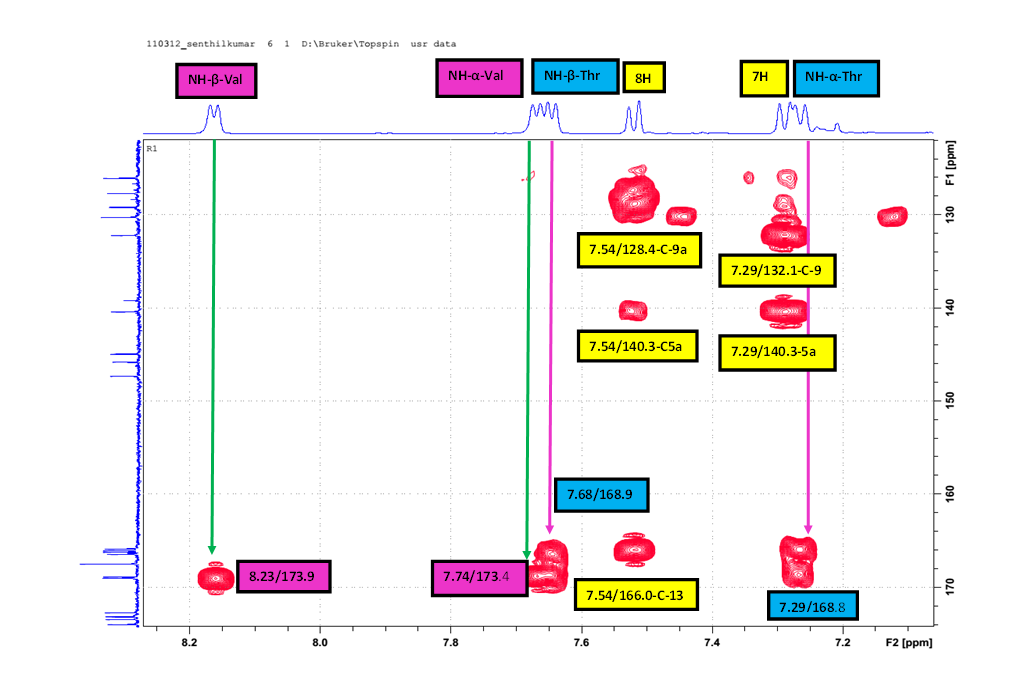


**
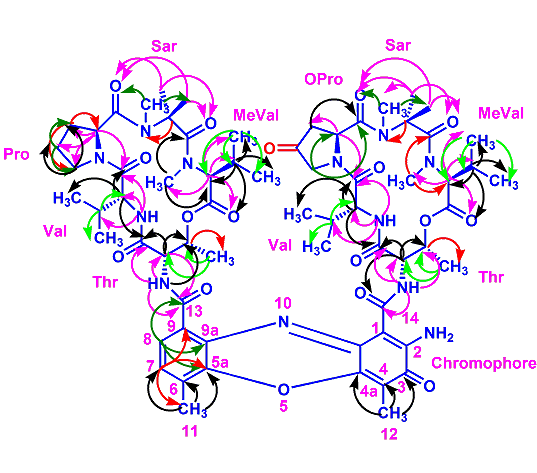
**


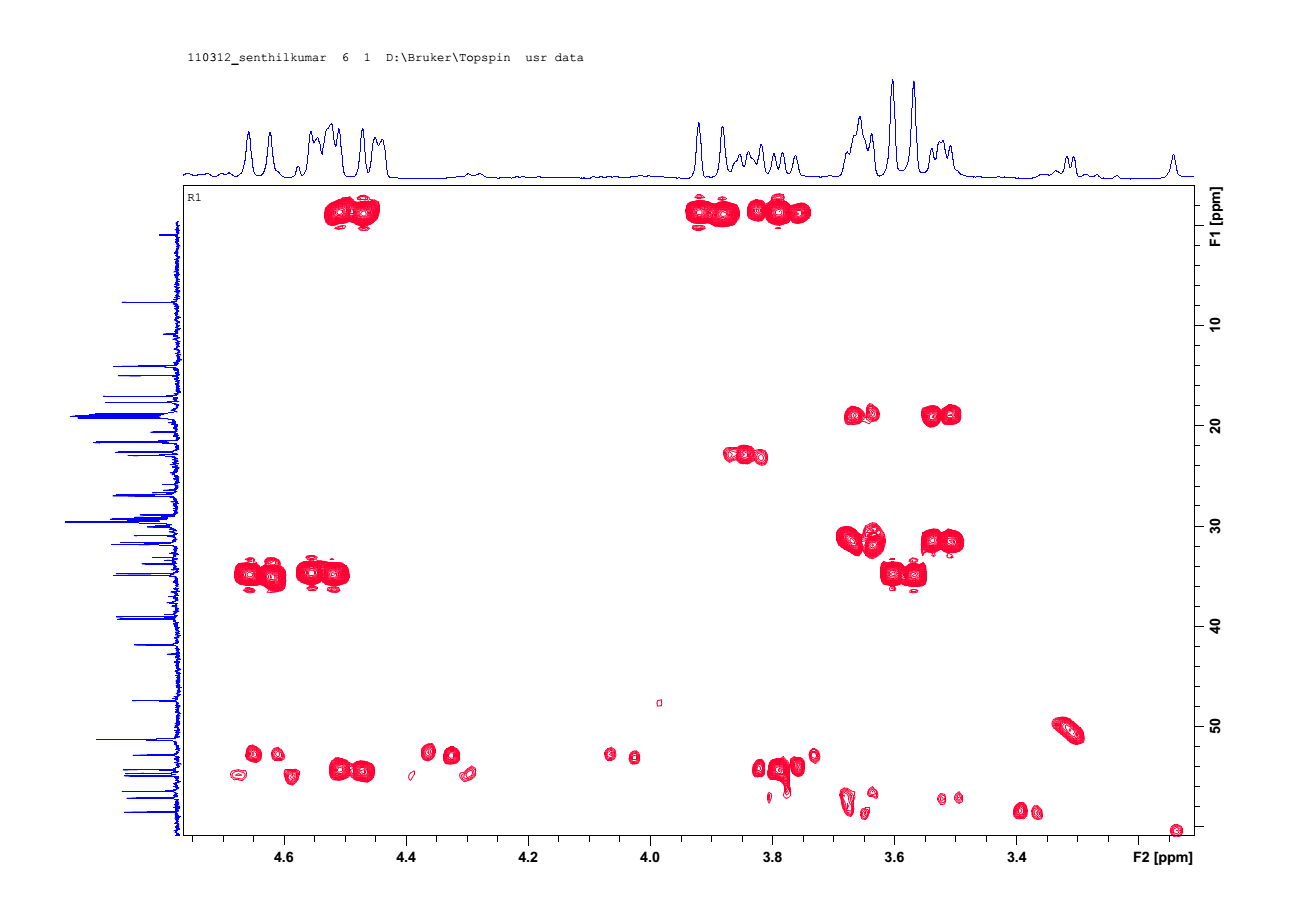


**Figure S34. Expansion of HMBC (500 MHz, CDCl3) Spectrum of Transitmycin (R1)**

**
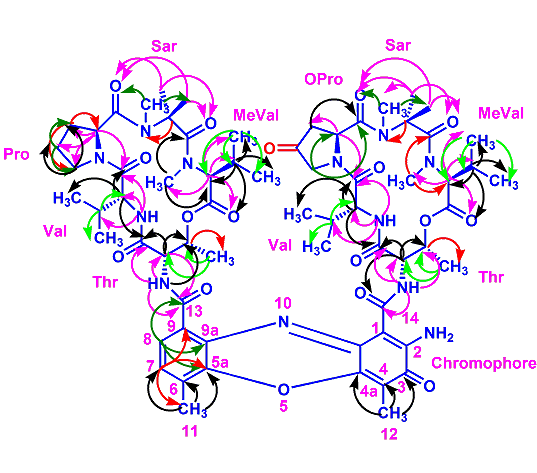

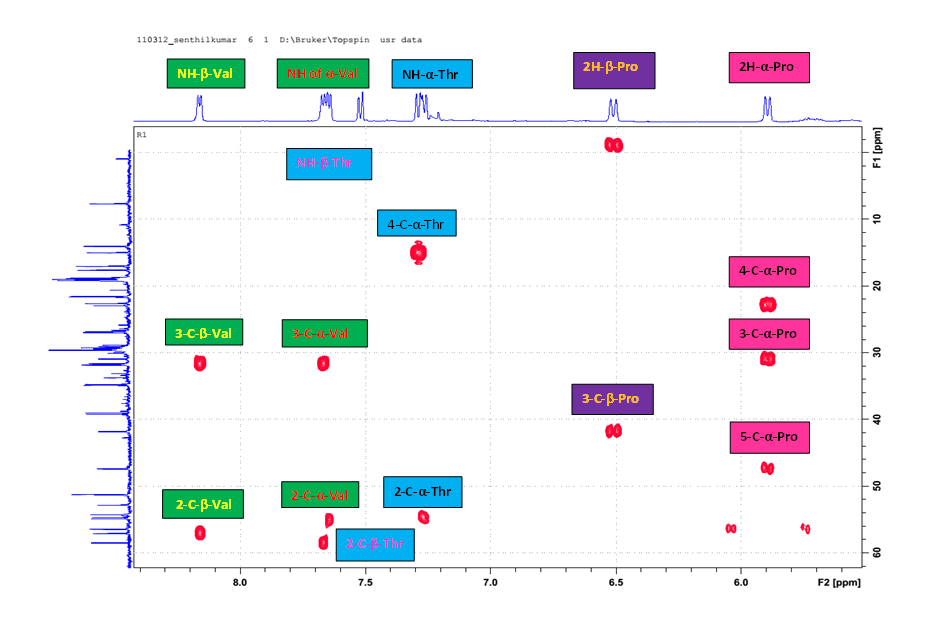
**

**Figure S35. Expansion of HMBC (500 MHz, CDCl3) Spectrum of Transitmycin (R1)**

**
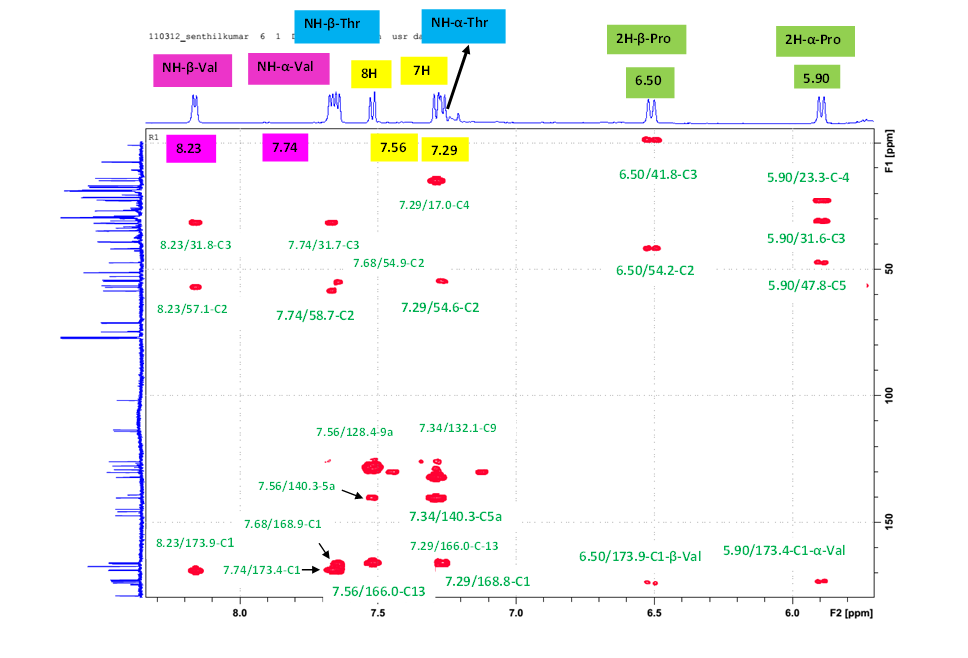
**

**
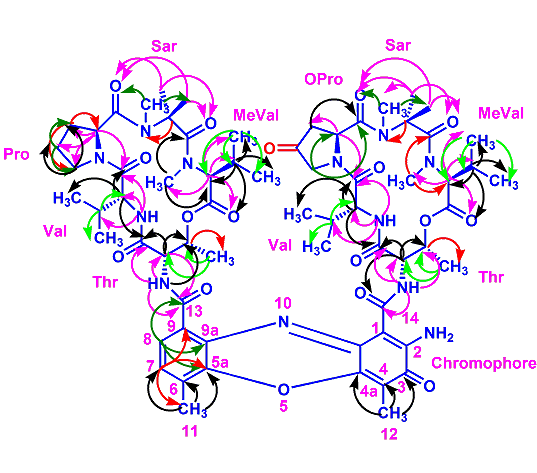
**

**Figure S36. Expansion of HMBC (500 MHz, CDCl3) Spectrum of Transitmycin (R1)**

**
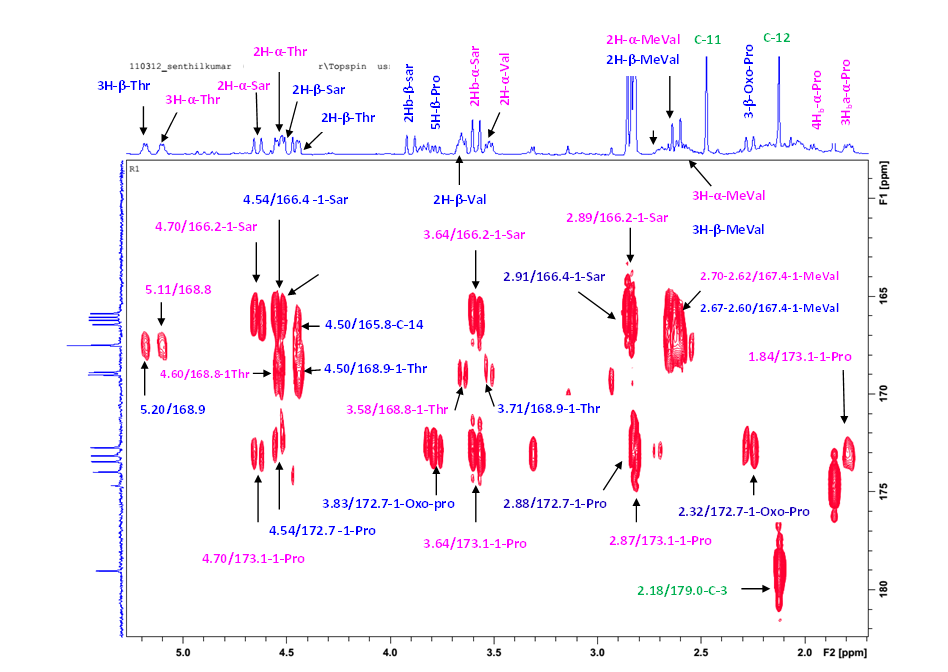
**

**
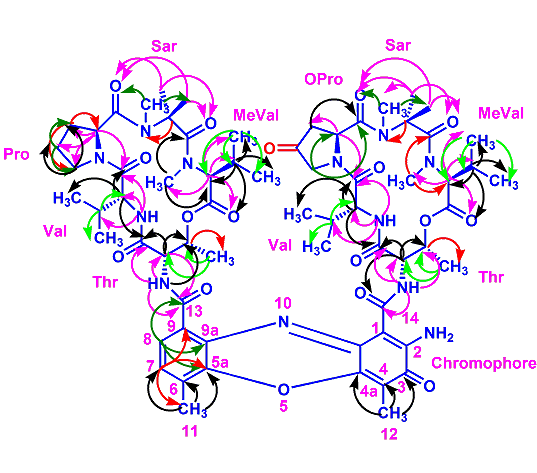
**

**Figure S37. Expansion of HMBC (500 MHz, CDCl3) Spectrum of Transitmycin (R1)**

**
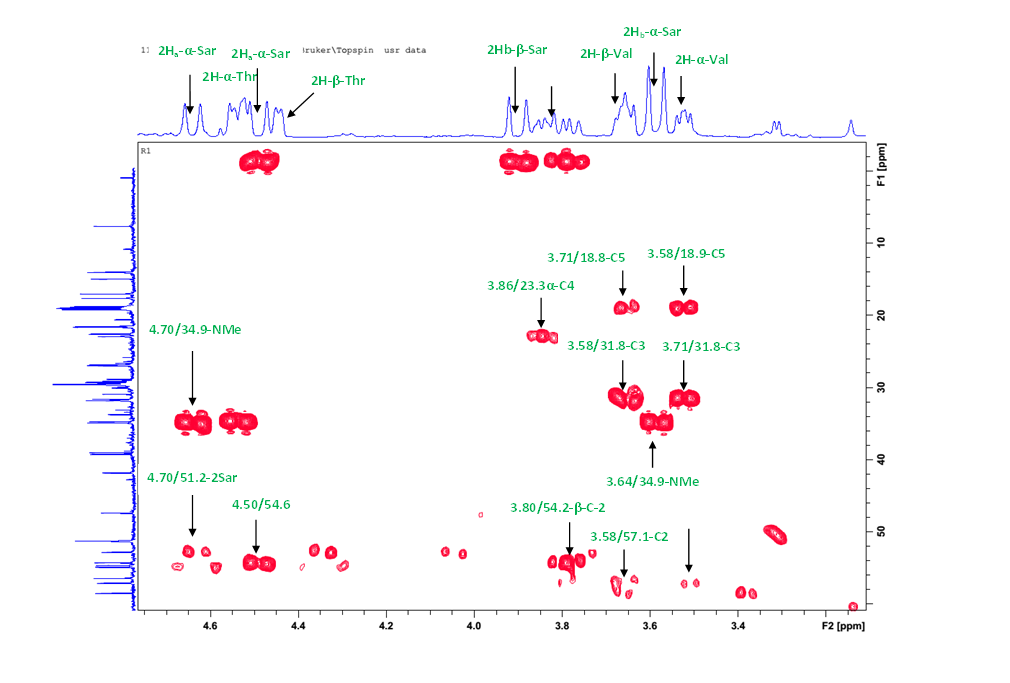
**


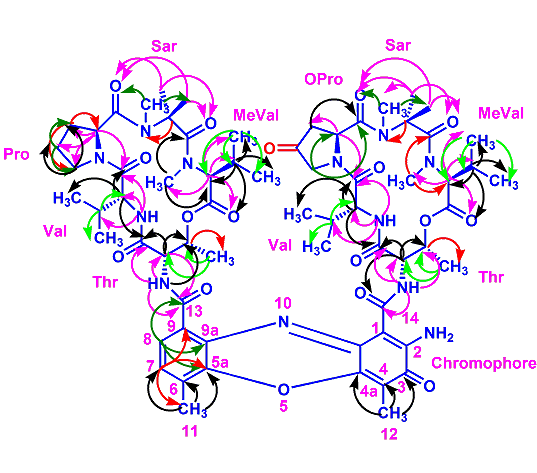


**Figure S38. Expansion of HMBC (500 MHz, CDCl3) Spectrum of Transitmycin (R1)**

**
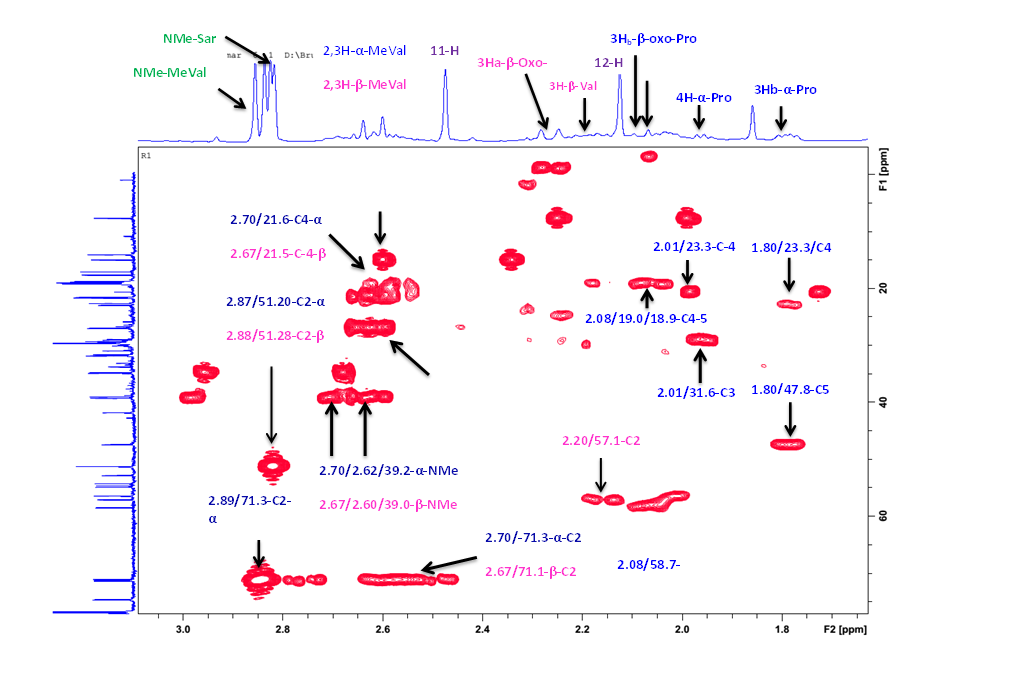
**

**Figure S39. Expansion of HMBC (500 MHz, CDCl3) Spectrum of Transitmycin (R1)**

**
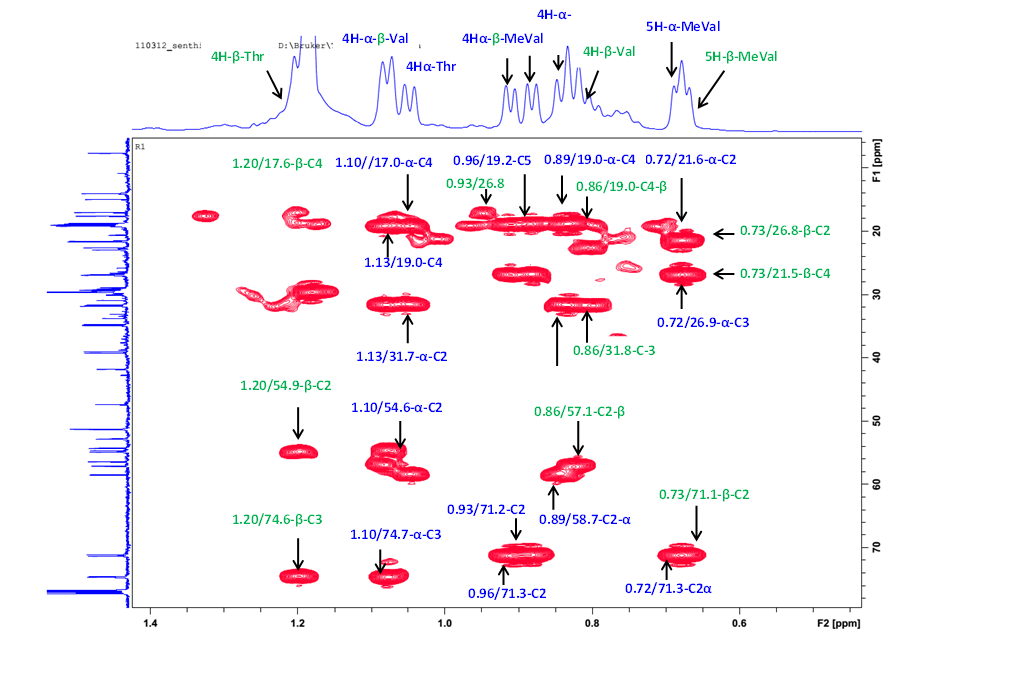

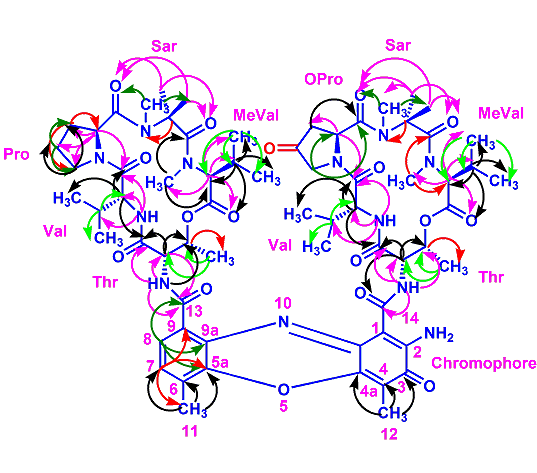
**

**Figure S40. Expansion of HMBC (500 MHz, CDCl3) Spectrum of Transitmycin (R1)**

**
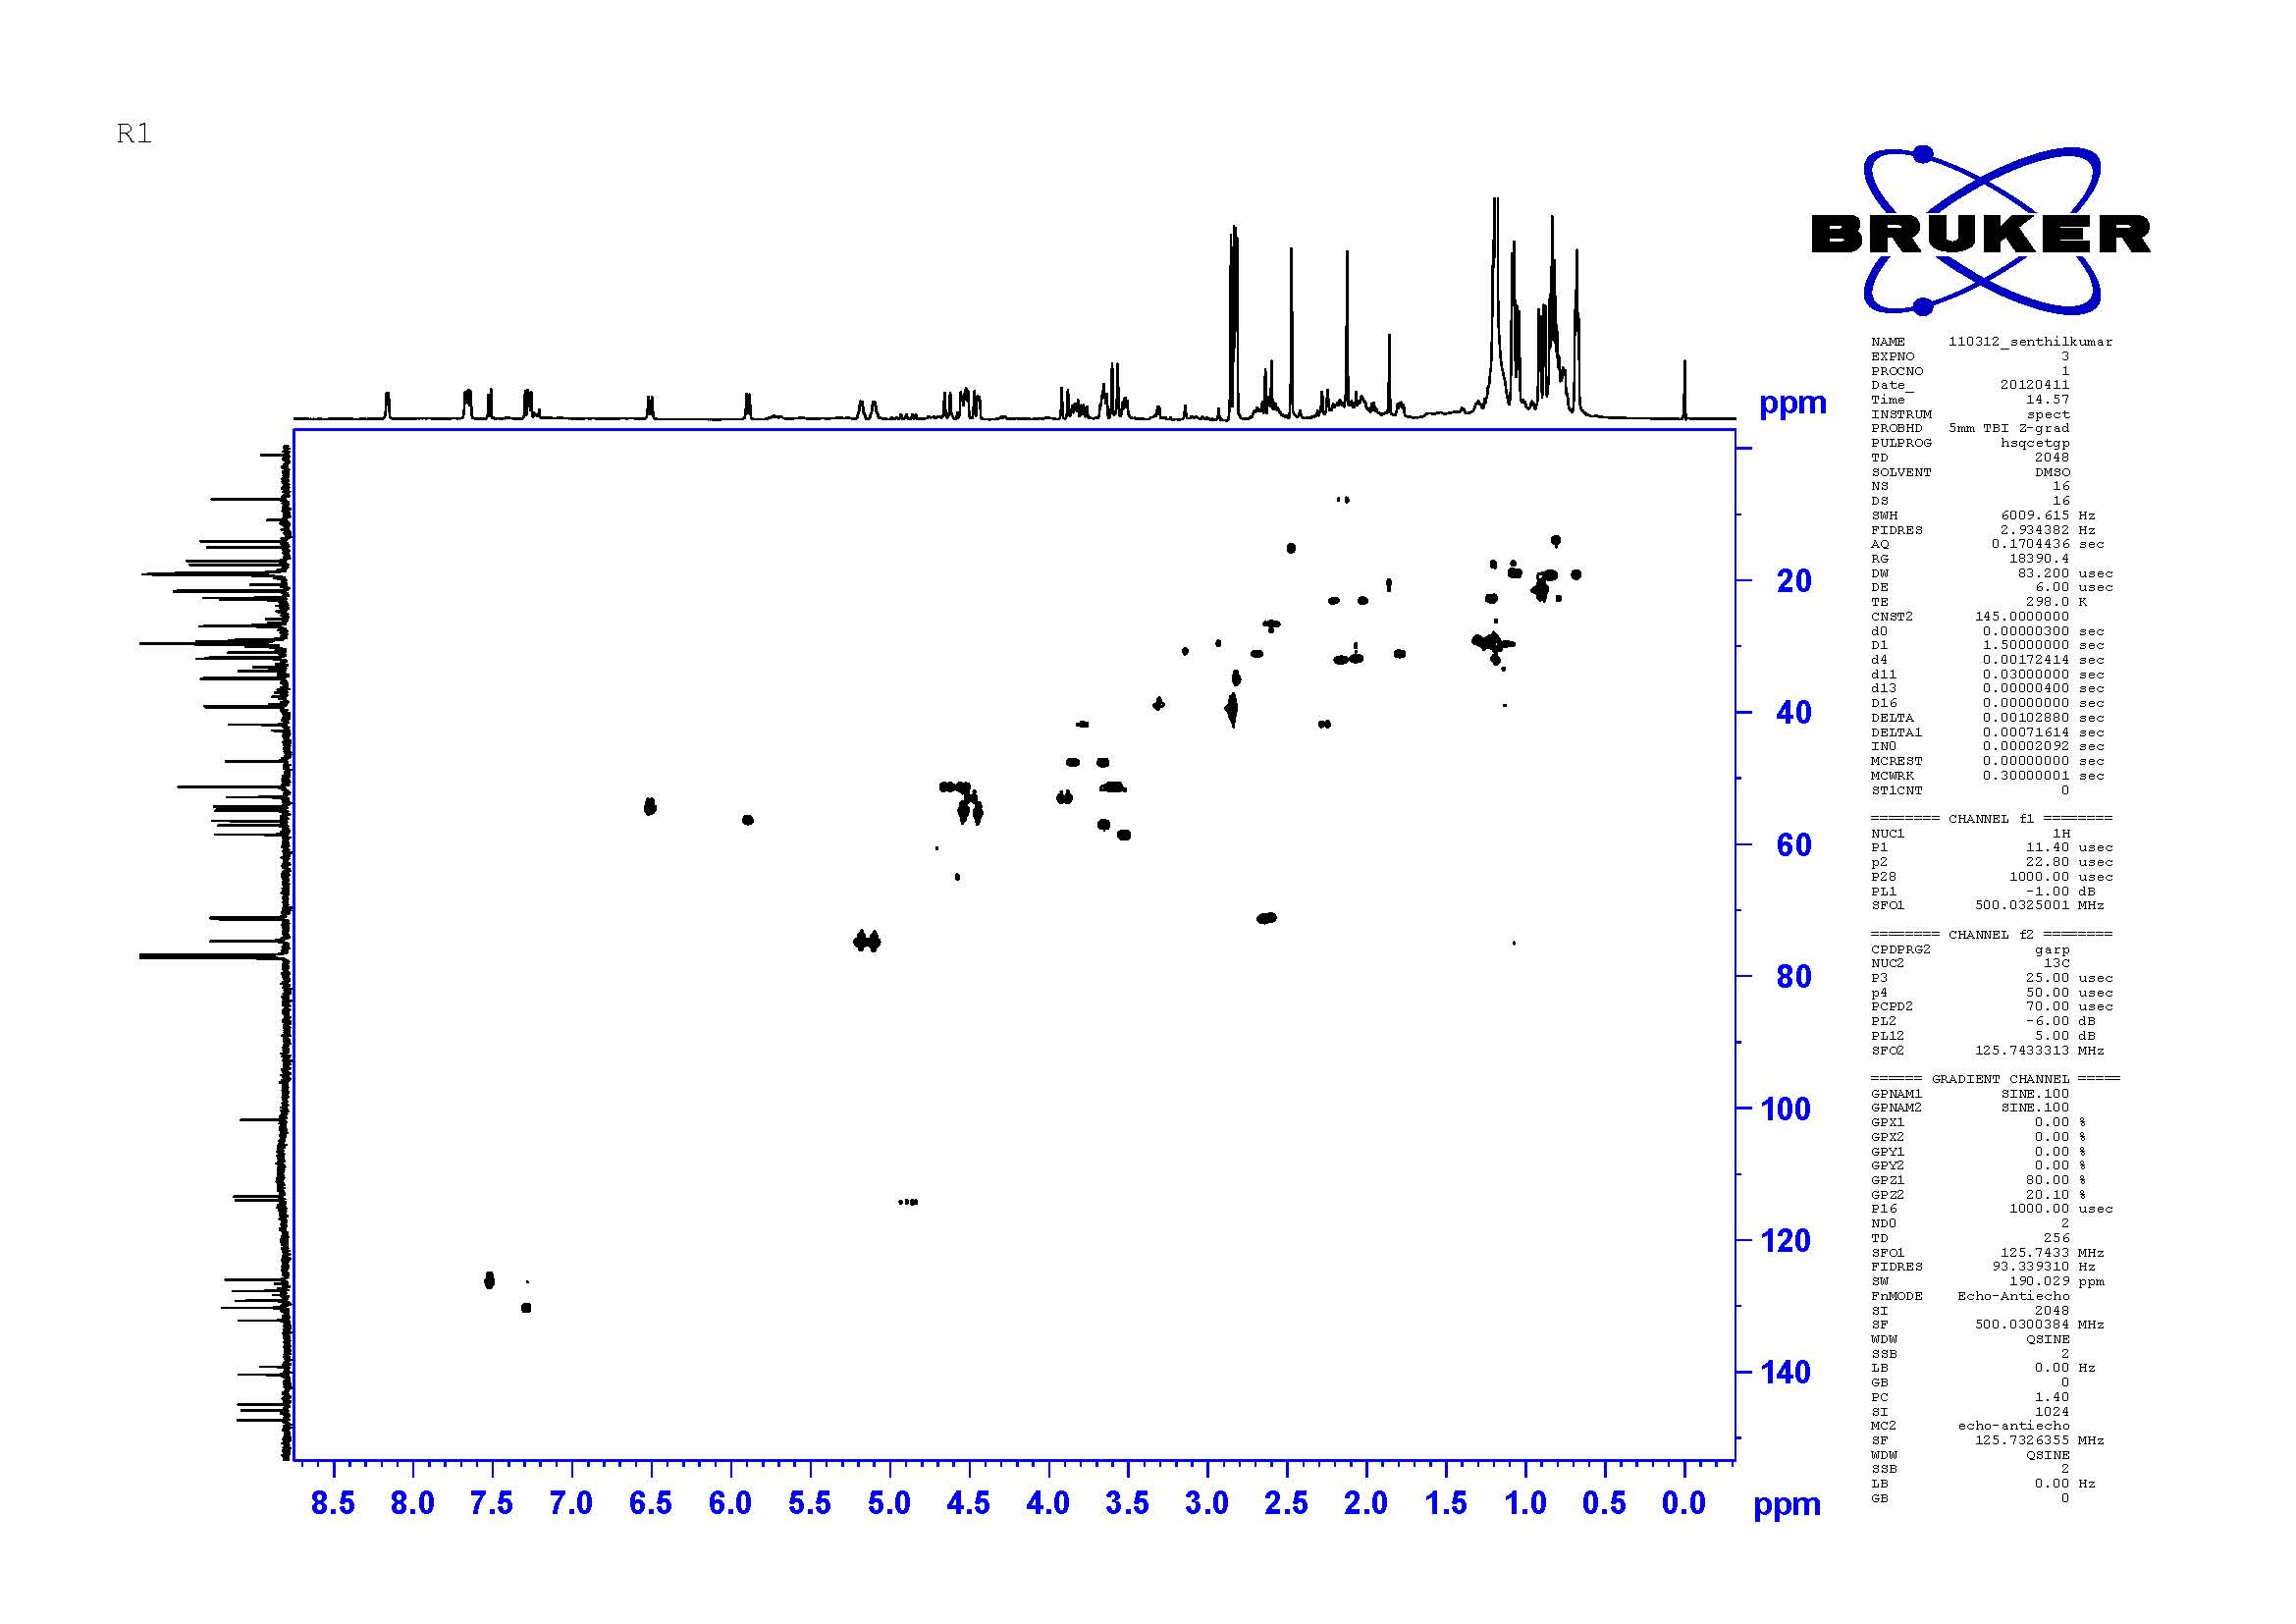
**


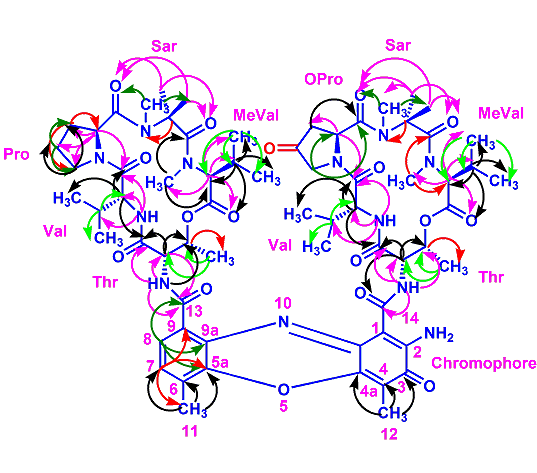


**Figure S41. HSQC (500 MHz, CDCl3) Spectrum of Transitmycin (R1)**

**
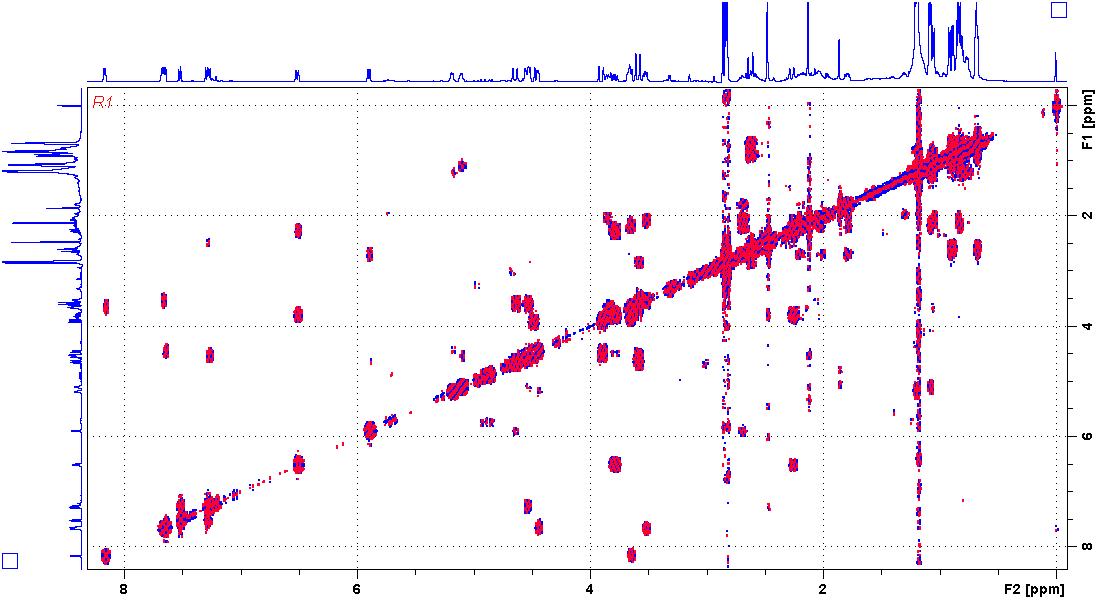

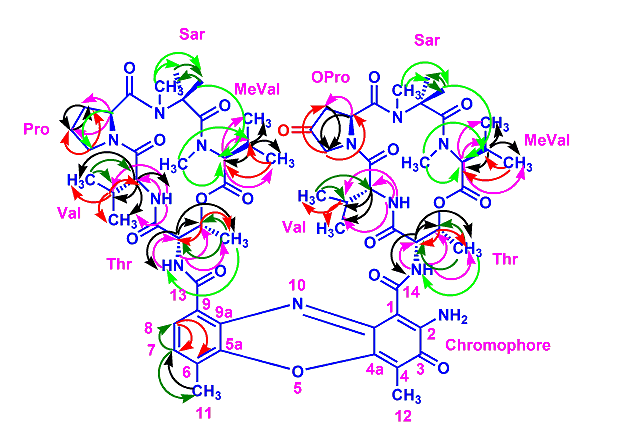
 Figure S42. TOCSY (500 MHz, CDCl3) Spectrum of Transitmycin
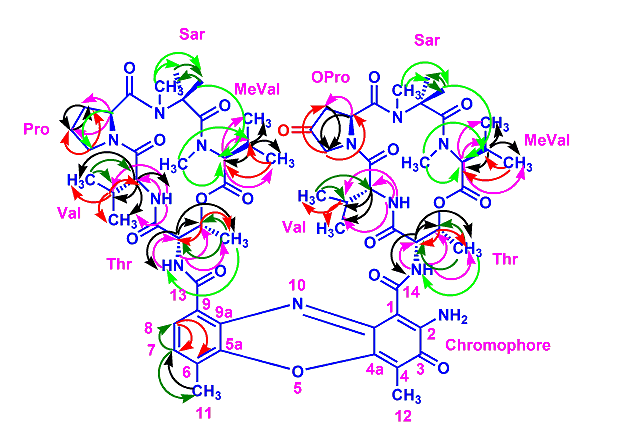
(R1)**

**
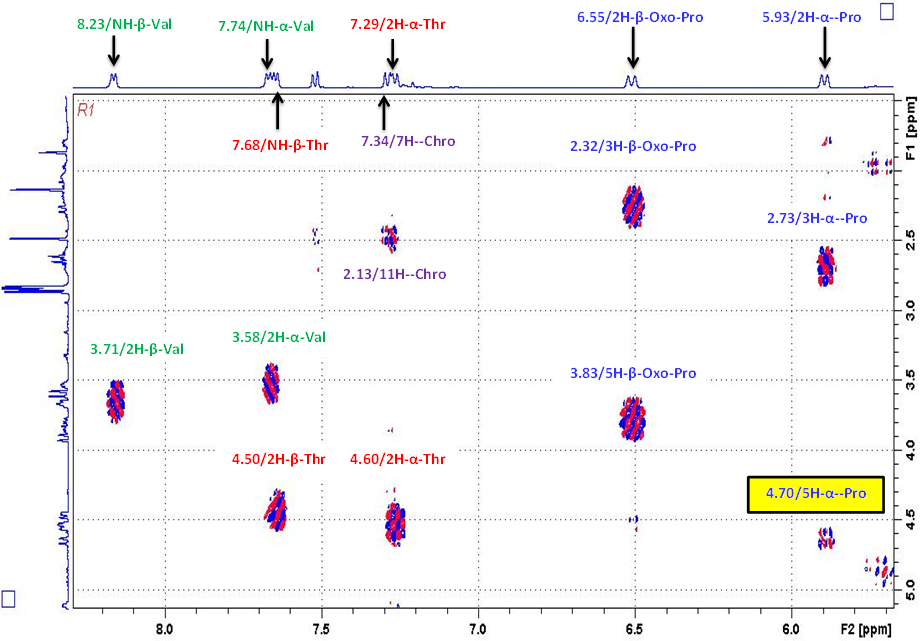
**


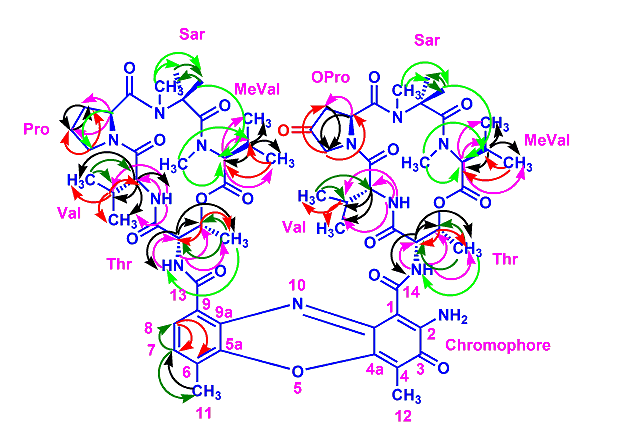


**Figure S43. Expansion of TOCSY (500 MHz, CDCl3) Spectrum of Transitmycin
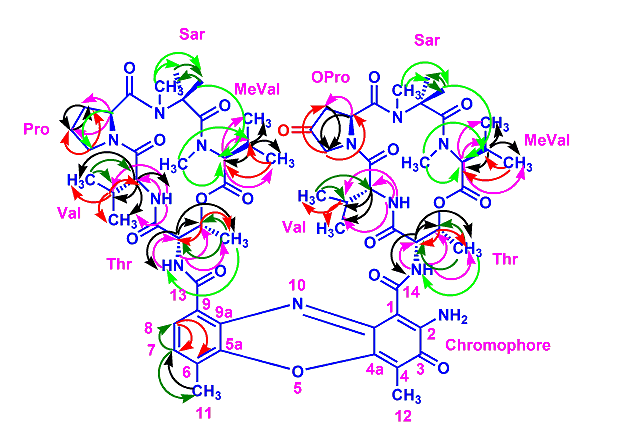
(R1)**

**
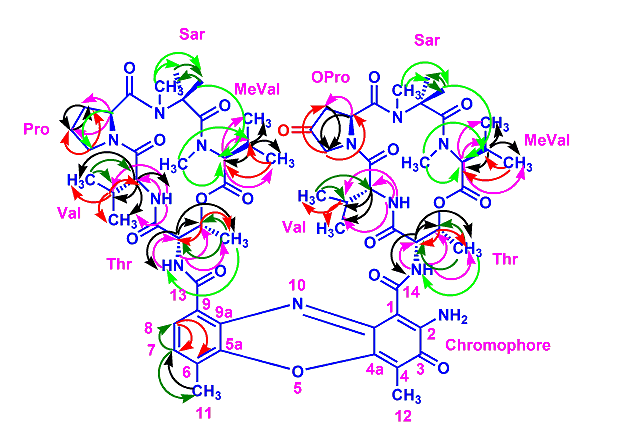

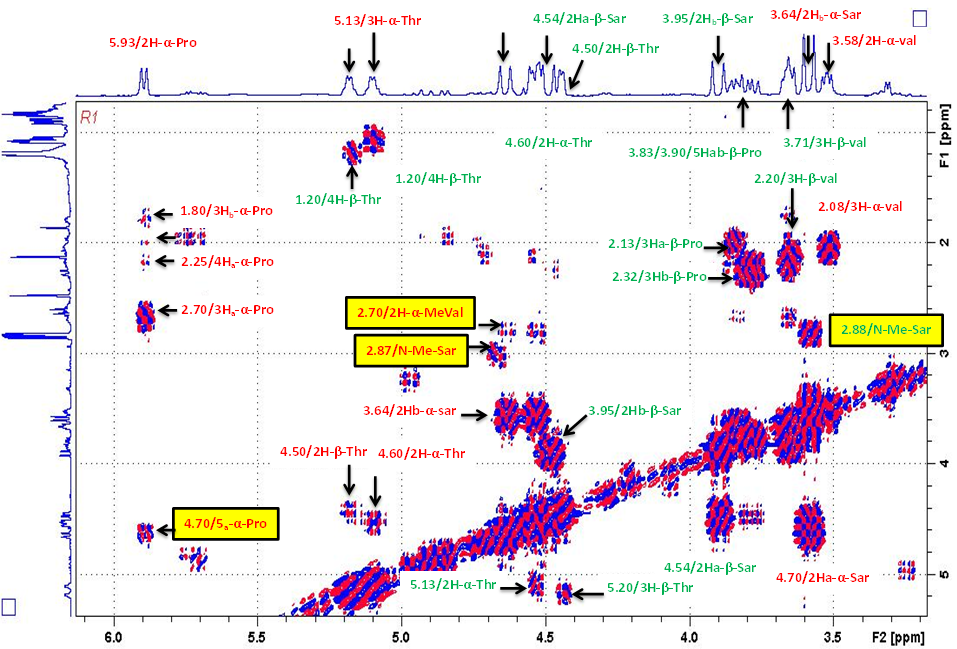
**

**Figure S44. Expansion of TOCSY (500 MHz, CDCl3) Spectrum of Transitmycin
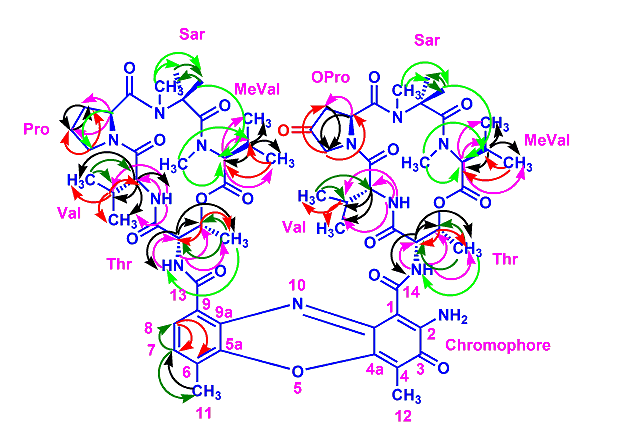
(R1)**

**
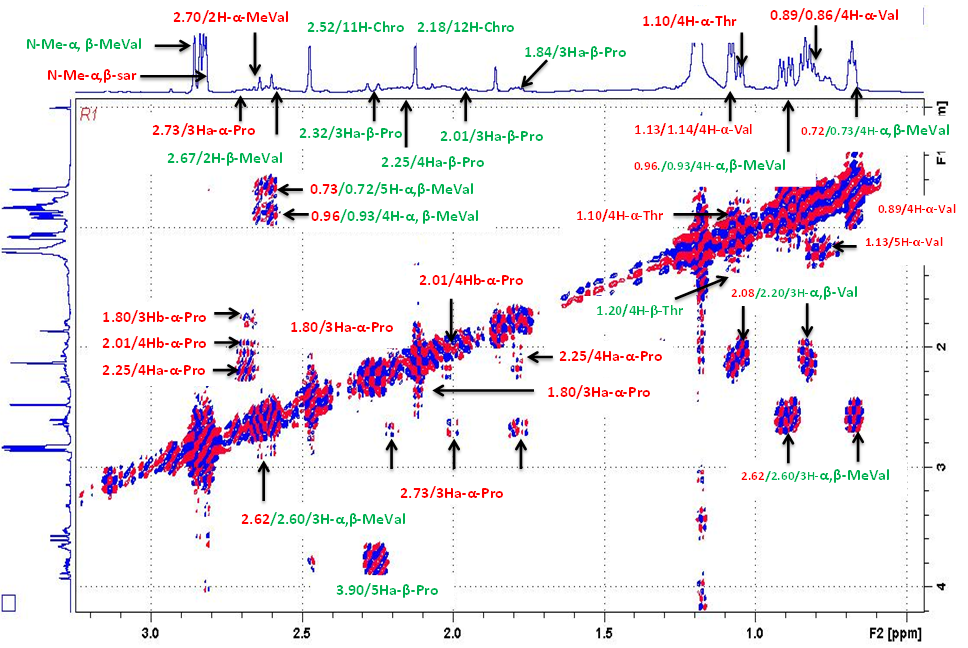
**


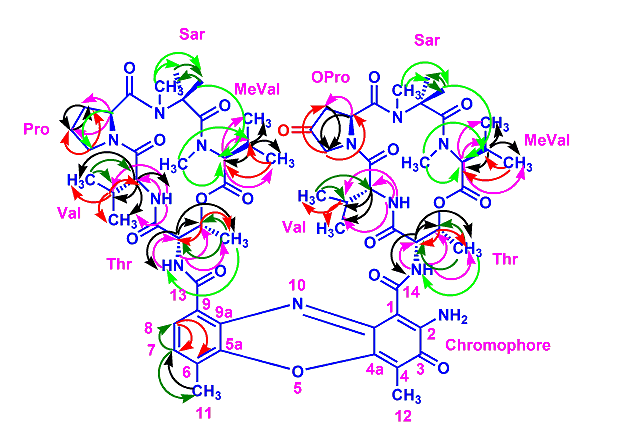


**Figure S45. Expansion of TOCSY (500 MHz, CDCl3) Spectrum of Transitmycin
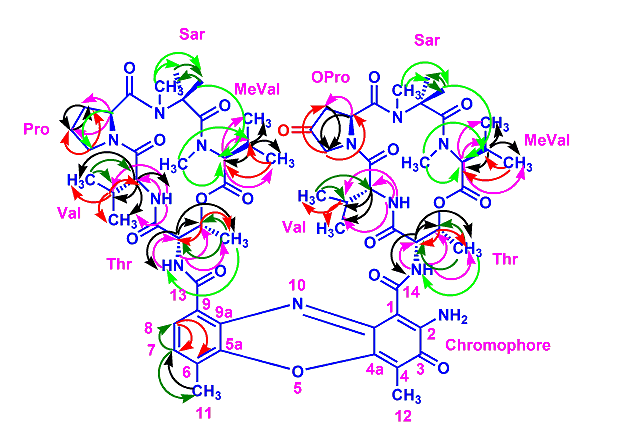
(R1)**


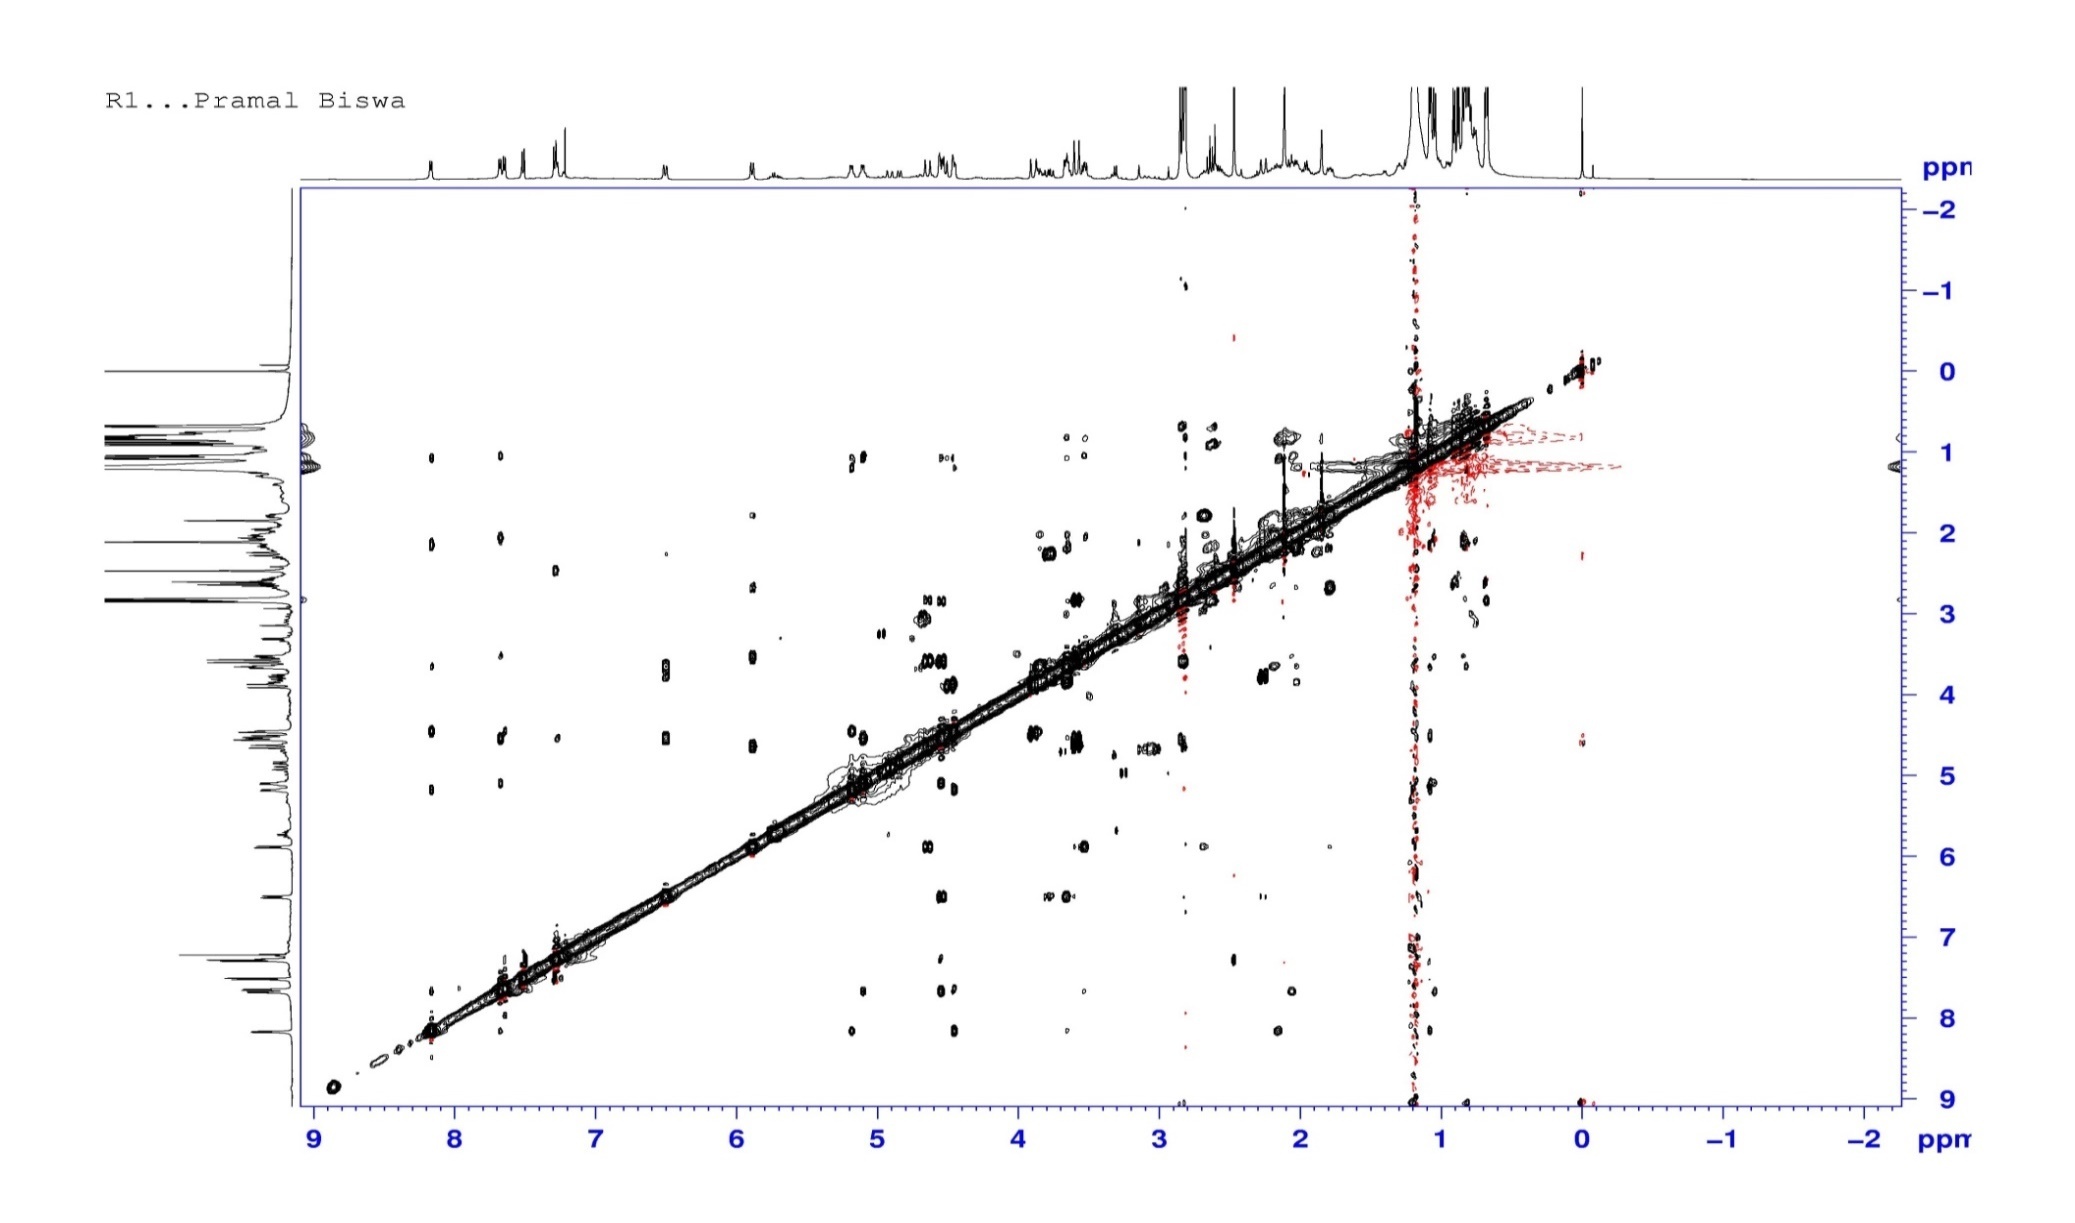


**Figure S46. NOESY (500 MHz, CDCl­3) Spectrum of Transitmycin (R1)**

**Figure S47. Expansion of NOESY (500 MHz, CDCl­3) Spectrum of Transitmycin (R1)**

**Figure S48**. Expansion of NOESY (500 MHz, CDCl­3) Spectrum of Transitmycin (R1)

**Figure S49. Expansion of NOESY (500 MHz, CDCl­3) Spectrum of Transitmycin (R1)**

**Figure S50. Expansion of NOESY (500 MHz, CDCl­3) Spectrum of Transitmycin (R1)**

**Figure S51. Expansion of NOESY (500 MHz, CDCl­3) Spectrum of Transitmycin (R1)**

**Figure S52. ROESY (500 MHz) Spectrum of Transitmycin (R1)**

**Table S5: NMR data of Trasitmycin (R1) in CDCl3 (1H: 500 MHz 13C: 125 MHz)**

| **α- ring** | **position** | **δC** | **δH** | ***J* (Hz)** | **COSY** | **TOCSY** | **HMBC** | **ROSEY** |
| --- | --- | --- | --- | --- | --- | --- | --- | --- |
| Thr | 1 | 168.8 | - |  |  |  |  |  |
|  | 2 | 54.6 | 4.60 | d , 10.0 | 3, 4, -NH | 3, 4 | 1, 3, 13 | 3, 4, 2-Val, Val-NH |
|  | 3 | 74.7 | 5.13 | m | 2, 4,- NH | 2, 4, | 4 | 2, 4, Val-NH |
|  | 4 | 17.0 | 1.10 | d, 6.5 | 2, 3 | 2, 3, -NH | 2, 3 | 2, 3, Val-NH |
|  | NH | - | 7.29 | d, 7.0 | 2, 3, 4 | 2, 3, 4 | 1, 3, 13 | 2, 4 |
|  |  |  |  |  |  |  |  |  |
| L-Val | 1 | 173.4 |  |  |  |  |  |  |
|  | 2 | 58.7 | 3.58 | dd, 10.5,6.5 | 3, 4, 5, -NH | 3, 4, 5, -NH | 1, 5, 1-Thr | 3, 4, 5, 2-Pro |
|  | 3 | 31.7 | 2.08 | m | 2, 4, 5 | 2, 4, 5 | 2,5 | 4, 5, 4-Thr |
|  | 4 | 19.0 | 0.89 | d, 7.0 | 2, 3 | 2, 3, -NH | 2,3,5 | 2, 3, 5 |
|  | 5 | 18.9 | 1.13 | d, 6.5 | 2, 3 | 2, 3, -NH | 2,3,4 | 2, 3, 2-Val, Val-NH |
|  | NH | - | 7.74 | d, 5.5 | 2, 3, 4, 5 | 2, 3, 4, 5 | 2, 3, 1-Thr | 2, 3, 4, 5  2- Thr, 3-Thr |
|  |  |  |  |  |  |  |  |  |
| Pro | 1 | 173.1 | - |  |  |  |  |  |
|  | 2 | 56.4 | 5.93 | d, 9.5 | 3a,3b,4a,4b | 3a,3b 4a, 4b | 3, 4, 5,  1-Val | 3a, 3b,  2a-Sar,2b-Sar, Sar-NMe |
|  | 3 | 31.6 | 2.73  1.84 | dd, 17.5,7.0  dd, 19.5, 6.5 | 3b, 4a, 4b  3a, 4a, | 3b, 4a, 4b  3a, 4a, | 1, 2, 4  1, 4, 5 | 3b, 2a-Sar, 2b-Sar  3a, 4a, 4b |
|  | 4 | 23.3 | 2.26  2.01 | d, 16.5  d, 8.0 | 3a, 3b, 4b  3b, 4a | 3a, 3b, 4b  3b, 4a | 3, 5  3, 5 | 4b, 5a, 5b  4a, 5a |
|  | 5a  5b | 47.8 | 3.86  3.67 | d, 18.5  d, 18.5 | 3a, 4a, 4b  3a, 4a, 4b | 3a, 4a, 4b  3a, 4a, 4b | 4, 1-Val | 5b |
|  |  |  |  |  |  |  |  |  |
| Sar | 1 | 166.2 | - |  |  |  |  |  |
|  | 2 | 51.2 | 2a, 4.70  2b, 3.64 | d, 17.5  d, 17.5 | 2b  2a | 2b, NMe  2a, NMe | 1, NMe,1-pro  1, NMe,1-Pro | 2b, NMe, 2-Pro  4-MeVal,  5-MeVal, NMe |
|  | N-Me | 34.9 | 2.87 | s |  | 2a, 2b | 2, 1-Pro | 2b, 3-MeVal |
|  |  |  |  |  |  |  |  |  |
| MeVal | 1 | 167.4 | - |  |  |  |  |  |
|  | 2 | 71.3 | 2.70 | d, 9.0 | 3, 4, 5 | 3, 4, 5 | 1, 3,4,NMe | 4, 5 |
|  | 3 | 26.9 | 2.62 | d, 7.0 | 2, 4, 5 | 2, 4, 5 | 1, 3, 4, 5, NMe | 4, 5 |
|  | 4 | 21.6 | 0.96 | d, 6.0 | 2, 3 | 2, 3, 5 | 2, 3, 5 | 3 |
|  | 5 | 19.2 | 0.72 | d, 6.5 | 2, 3 | 2, 3, 4 | 2, 3, 4 | 3 |
|  | N-Me | 39.2 | 2.89 | s | - | 2, 3 | 2, 1-Sar | 2, 3, 5, 2a-Sar,  2b-Sar |

| **β- ring** | **position** | **δC** | **δH** | ***J* (Hz)** | **COSY** | **TOCSY** | **HMBC** | **NOESY** |
| --- | --- | --- | --- | --- | --- | --- | --- | --- |
| Thr | 1 | 168.9 | - |  |  |  |  |  |
|  | 2 | 54.9 | 4.50 | d, 9.0 | 3,4, -NH | 3, 4 | 1, 3, 14 | 3, 4, 2-Val, Val-NH |
|  | 3 | 74.6 | 5.23 | m | 2,4,- NH | 2, 4 | 4 | 2,4, Val-NH |
|  | 4 | 17.6 | 1.20 | d, 6.0 | 2, 3 | 2, 3, - NH | 2, 3 | 2,3, Val-NH |
|  | NH | - | 7.68 | d, 6.0 | 2, 3, 4 | 2, 3, 4 | 1, 3, 14 | 2, 4 |
|  |  |  |  |  |  |  |  |  |
| L-Val | 1 | 173.9 | - |  |  |  |  |  |
|  | 2 | 57.1 | 3.71 | dd, 10.5, 6.5 | 3, 4, 5, -NH | 3, 4, 5, -NH | 1, 3, 5, 1-Thr, | 3, 4, 5, 2-Oxo pro |
|  | 3 | 31.8 | 2.20 | m | 2, 4, 5 | 2, 4, 5 | 2, 5 | 4, 5, 4-Thr |
|  | 4 | 19.0 | 0.86 | d, 7.0 | 2, 3 | 2, 3, -NH | 2, 3, 5 | 2, 3, 5 |
|  | 5 | 18.8 | 1.14 | d, 7.0 | 2, 3 | 2, 3, -NH | 2, 3, 4 | 2, 3, 2-Val, Val-NH |
|  | NH |  | 8.23 | d, 6.0 | 2, 3, 4, 5 | 2, 3, 4, 5 | 2, 3, 1-Thr | 2, 3, 4, 5  2-Thr, 3-Thr |
|  |  |  |  |  |  |  |  |  |
| Oxo-Pro | 1 | 172.7 | - |  |  |  |  |  |
|  | 2 | 54.2 | 6.55 | dd, 10.0, 2.0 | 3, 5 | 3, 5 | 3, 1-Val | 3, 5  2a-Sar, 2b-sar  NMe |
|  | 3 | 41.8 | 2.32  2.13 | d , 18.5  d, 13.0 | 2, 5  2, 5 | 2, 5  2, 5 | 1  1 | 2, 5  2, 5 |
|  | 4 | 208.0 | - | - |  |  | - |  |
|  | 5 | 53.7 | 3.83  3.90 | d, 18.5  dd, 18.5 12.0 | 2, 3  2, 3 | 2, 3  2, 3 | 1, 2  1, 2 | 2, 3  2, 3 |
|  |  |  |  |  |  |  |  |  |
| Sar | 1 | 166.4 |  |  |  |  |  |  |
|  | 2 | 51.28 | 2a, 4.54  2b, 3.95 | d, 19.5  d, 19.0 | 2b  2a | 2b, NMe  2a, NMe | 1, NMe, 1-Pro  1, NMe, 1-Pro | 2b, NMe, 2- oxopro  4-MeVal , 5-MeVal, NMe |
|  | N-Me | 34.7 | 2.88 | s |  | 2a, 2b | 2, 1-Pro | 2b, 2MeVal |
|  |  |  |  |  |  |  |  |  |
| MeVal | 1 | 167.4 | - | - |  |  |  |  |
|  | 2 | 71.1 | 2.67 | d, 8.5 | 3, 4, 5 | 3, 4, 5 | 1, 3, 4, 5, NMe | 4, 5 |
|  | 3 | 26.8 | 2.60 | d, 8.0 | 2, 4, 5 | 2, 4, 5 | 1, 3, 4, 5, NMe | 4, 5 |
|  | 4 | 21.5 | 0.93 | d, 6.0 | 2, 3 | 2, 3, 5 | 2, 3, 5 | 3 |
|  | 5 | 19.1 | 0.73 | d, 6.0 | 2, 3 | 2, 3, 4 | 2, 3, 4 | 3 |
|  | N-Me | 39.0 | 2.91 | s | - | 2, 3 | 2, 1- Sar | 2, 5, 2a-Sar, 2b-Sar |

**Chromophore**

| **Position** | **δC** | **δH** | ***J* (Hz)** | **COSY** | **TOCSY** | **HMBC** | **NOESY** |
| --- | --- | --- | --- | --- | --- | --- | --- |
| 1 | 101.8 | - |  |  |  |  |  |
| 2 | 147.3 | - |  |  |  |  |  |
| 3 | 179.0 | - |  |  |  |  |  |
| 4  4a | 113.4  144.9 | - |  |  |  |  |  |
| 5  5a | -  140.3 |  |  |  |  |  |  |
| 6 | 127.6 | - |  |  |  |  |  |
| 7 | 130.2 | 7.34 | d, 8.0 | 8, 11 | 8, 11 | 5a, 9, 11-Me | 11 |
| 8 | 126.0 | 7.56 | d, 7.5 | 7, 11 | 7, 11 | 9a, 5a, 13 | 11 |
| 9  9a | 132.1  128.4 | -  - |  |  |  |  |  |
| 10 | - | - |  |  |  |  |  |
| 11 | 14.9 | 2.52 | s | 7, 8 | 7, 8 | 5a, 6, 7 | 7, 8 |
| 12 | 7.6 | 2.18 | s | - | - | 3, 4, 4a | - |
| 13 | 166.0 | - |  |  |  |  |  |
| 14 | 165.8 | - |  |  |  |  |  |

**Figure S53. 1H-NMR (500 MHz, CDCl3) Spectrum Of Compound R2**

**Figure S54. 13 C NMR (125 MHz, CDCl3) Spectrum Of Compound R2**

**Figure S55. DEPT135&90 (125 MHz, CDCl3) Spectrum of Compound R2**

**Figure S56. Expansion of DEPT135 &90 (125 MHz, CDCl3) Spectrum of Compound R2**

**Figure S57. Expansion of DEPT135 &90 (125 MHz, CDCl3) Spectrum of Compound R2**

**Figure S58. COSY (500 MHz) Spectrum of Compound R2**

**Figure S59. DQF-COSY (500 MHz) Spectrum of Compound R2**

**Figure S60. HMBC (500 MHz) Spectrum Compound of R2**

**Figure S61. HSQC (500 MHz) Spectrum of Compound R2**

**Figure S62. TOCSY (500 MHz) Spectrum of Compound R2**

**Figure S63.NOESY (500 MHz) Spectrum of Compound R2**

**Figure S64. 1H-NMR (500 MHz, CDCl3) Spectrum of Compound R3**

**Figure S65. DQF-COSY (500 MHz, CDCl3) Spectrum of Compound R3**

**Figure S66. HMBC (500 MHz) Spectrum of Compound R3**

**Figure S67. HSQC (500 MHz) Spectrum of Compound R3**

**Figure S68. TOCSY (500 MHz, CDCl3) Spectrum of Compound R3**

**Figure S69. NOESY (500 MHz) Spectrum of Compound R3**

**Figure S70. MALDI-TOF MS Spectrum of Transitmycin (R1) (Molecular ion peak) (positive mode)**

**Figure S71. Expansion of MALDI-TOF MS Spectrum of Transitmycin (R1) (Molecular ion peak) (positive mode)**

**Figure S72. Expansion of MALDI-TOF MS Spectrum of Transitmycin (R1) (Molecular ion peak) (Negative mode)**

**Figure S73. MALDI-TOF MS Spectrum of R2 (Molecular ion peak) (positive mode)**

**Figure S74. Expansion of MALDI-TOF MS Spectrum of R2 (Molecular ion peak) (positive mode)**

**Figure S75. Expansion of MALDI-TOF MS Spectrum of R2 (Molecular ion peak) (Negative mode)**

**Figure S76. MALDI-TOF MS Spectrum of R3 (Molecular ion peak) (positive mode)**

**Figure S77. MALDI-TOF MS Spectrum of R3 (Molecular ion peak) (Negative mode)**

**Figure S78. MALDI-TOF MS Spectrum of Transitmycin (R1) (Positive mode)**

**Figure S79. MALDI-TOF MS Spectrum of Transitmycin (R1) (Negative mode)**

**Table S6. MALDI-TOF MS Spectral Fragmentation of Transitmycin (R1) (Positive mode)**

| 211- β-Ring-Val-Oxo-Pro  233- α -Ring-Val-Pro  294-β-Ring-Oxo-Pro-Sar-NMeVal  295-Chromophore  297- β-Ring-Thr-Val-Oxo-Pro  357-α-Ring-Val-Pro-Sar-MeVal  371-β-Ring-Val-Oxo-Pro-Sar-MeVal  412-β-Ring-Val-Oxo-Pro-Sar-NMeVal  412-α-Ring-Val-Pro-Sar-NMeVal+859 (Y ion)  495-β-Ring-Thr-Val-Oxo-Pro-Sar-NMeVal  496-α-Ring-Thr-Val-Pro-Sar-NMeVal  464 α - Ring-Thr-Val-Oxo-Pro-Sar-NMeVal  746-Y-113 (MeVal)  747- α-Ring-Val-Pro-Sar-NMeVal+Y-MeVal+545.6  1291-495  1291=746-545  1291=651+621  1291=495+775  1291=859+432  1291=920+371  1291=796+495  495= β-Ring-Thr-Val-Oxo-Pro-Sar-NMeVal  495-371=124-23=101 MeVal (β-Ring-Thr-Val-Oxo-Pro-Sar)  371(β-Ring-Thr-Val-Oxo-Pro-Sar)  294 (β-Ring-Thr-Val-Oxo-Pro) |
| --- |

**Figure S80. MALDI-TOF MS Spectrum of R2 (Positive mode)**

**Figure S81. MALDI-TOF MS Spectrum of R2 (Negative mode)**

**Figure S82. MALDI-TOF MS Spectrum of R3 (Positive mode)**

**Figure S83. MALDI-TOF MS Spectrum of R3 (Negative mode)**

**Figure S84. QTRAP MS/MS Transitmycin (R1) (Molecular ion peak) (Positive mode)**

**Figure S85 QTRAP MS/MS Transitmycin (R1) (Molecular ion peak [M+H]2+ (Positive mode)**

**Figure S86. QTRAP MS/MS of Transitmycin (R1) (Molecular ion peak ) (Negative mode)**

**Figure S87. QTRAP MS/MS of R2 (Molecular ion peak) ((Positive mode)**

**Figure S88. QTRAP MS/MS of R2 [M+H]2+ ion peak (Positive mode)**

**Figure S 89. QTRAP MS/MS of R2 (Molecular ion peak (Positive mode)**

**Figure S90. QTRAP MS/MS of R3 Molecular ion peak (Positive mode)**

**Figure S91. QTRAP MS/MS of R3 (Molecular ion peak (Negative mode)**

**[M + Na]+**

**[M + K]+**

**[M + 2H]2+**

**[M + H]+**

**Figure S92. HR-ESI-MS Spectrum of Transitmycin (R1) (Positive mode)**

**[M + Na]+**

**[M + K]+**

**Figure S93. HR-ESI-MS Spectrum of Transitmycin (R1) (Molecular ion Peak) (Positive mode)**

**[M+Na]+**

**[M+K]+**

**[M+2H]2+**

**Figure S94. HR-ESI-MS Spectrum of R2 (Positive mode)**

**[M+Na]+**

**[M+K]+**

**Figure S95. HR-ESI-MS Spectrum of R2 (Molecular ion Peak) (Positive mode)**

**[M+H]+**

**[M+K]+**

**Figure S96. HR-ESI-MS Spectrum of R3 (Positive mode)**

**[M+H]+**

**Figure S97. HR-ESI-MS Spectrum of R3 (Molecular ion Peak) (Positive mode)**

**[M + Na]+**

**LC-ESI-MS Spectrum of CompoundR1(Positive mode)**

**Figure S98. LC-ESI-MS Spectrum of Transitmycin (R1) (Molecular ion peak) (Positive mode)**

**[M + Na]+**

**Figure S99. LC-ESI-MS Spectrum of Transitmycin (R1) (Positive mode)**

**[M + Na]+**

**[M + H]+**

**Figure S100. LC-ESI-MS Spectrum of Trasitmycin (R1) (Positive mode)**

**Figure S101. LC-ESI-MS Spectrum of Trasitmycin (R1) (Positive mode)**

**[M+Na]+**

**Figure S102. LC-ESI-MS Spectrum of R2 (Positive mode)**

**[M+Na]+**

**Figure S103. LC-ESI-MS Spectrum of R2 (Molecular ion) (Positive mode)**

**[M-OH+NaH]+**

**Figure S104. LC-ESI-MS Spectrum of R3 (Positive mode)**

**[M-OH+NaH]+**

**Figure S105. LC-ESI-MS Spectrum of R3 (Positive mode)**

**Figure S106. EI-MS Spectrum of Transitmycin (R1) (Positive mode)**

**[M+Na]+**

**Figure S107. EI-MS Spectrum of (R1) (molecular ion peak) (Positive mode)**

**Figure S108. EI-MS Spectrum of (R2) (Positive mode)**

**Figure S109 EI-MS Spectrum of (R3) (Positive mode)**

**Figure S110. CHN analysis data of Transitmycin (R1), R2, R3**

**Figure S111. 3200 QTRAP LC/MS/MS Spectrum of Transitmycin (R1) (Negative mode)**

**Figure S112. 3200 QTRAP LC/MS/MS Spectrum of Transitmycin (R1) (positive mode)**

**Figure S113. 3200 QTRAP LC/MS/MS Spectrum of Transitmycin (R1) (positive mode mode)**

**Figure S114. 3200 QTRAP LC/MS/MS Spectrum of Transitmycin (R1) (positive mode)**

**Figure S115. 3200 QTRAP LC/MS/MS Spectrum of Transitmycin (R1) (positive mode)**

**Figure S115 a-b** Structural characterisation of Transitmycin (R1) obtained by QTRAP LC-MS/MS. **b** Product ions [MS2] the [M+Na]+ ions Transitmycin (R1) obtained by QTRAP LCMS/MS [MS2] of 1291.6, 1291.6 [M+H]+, 1178.5 Loss of H-MeVal-OH, 1065.5 Loss of 2XH-MeVal, 994.2 Loss of Sar-2XH-MeVal-OH, 923.4 Loss of 2XSar-2XH-MeVal-OH, 851.3 Loss of 2XSar-2XH-MeVal-OH, 796.4 Loss of H-Thr-Val-Oxo-Pro-Sar-MeVal-OH, 683.2 Loss of H-Thr-Val-Oxo-Pro-Sar-MeVal-OH + Loss of H-MeVal-OH, 657.5 Loss of H-Val-Pro- Sar-MeVal-OH + Loss of H-Pro- Sar-MeVal-OH, 639.4 Loss of H-Val-Pro- Sar-MeVal-OH + Loss of H-Pro- Sar-MeVal-OH (18), 518.3 Loss of H`-Val-OXO-Pro-Sar-MeVal-OH + Loss of H-Val-Pro- Sar-MeVal-OH, 518.3 Loss of H`-Val-OXO-Pro-Sar-MeVal-OH + Loss of H-Val-Pro- Sar-MeVal-OH, 487.0 Loss of H-Val-OXO-Pro-Sar-MeVal-OH + Loss of H-Val-Pro- Sar-MeVal-OH (32), 443.3 Loss of H-Val-OXO-Pro-Sar-MeVal-OH + Loss of H-Val-Pro- Sar-MeVal-OH (32), 405.3 Loss of H-Val-OXO-Pro-Sar-MeVal-OH + Loss of H-Val-Pro- Sar-MeVal-OH, 334.4 Loss of H-Th-Val-Oxo-Pro-Sar-MeVal-OH + Loss of H-Th-Val-Pro- Sar-MeVal-OH.

**Table S7a. Structural characterisation of Transitmycin (R1) obtained by QTRAP LCMS/MS**

| Product ions of [MS2] the [M+H]+ ions of Transitmycin (R1) obtained by QTRAP LCMS/MS |
| --- |
| [MS2] of 1269.7  1269.7 = [M+H]+  1269.7-313.2 = 956.5 Loss of H-Oxo-Pro-Sar-MeVal-OH  1269.7-412.5 = 857.2 Loss of H-Val-Oxo-Pro-Sar-MeVal-OH  1269.7-612.3 = 657.4 Loss of H-Val-Oxo-Pro-Sar-MeVal-OH + Loss of Sar-MeVal-OH  1269.7-711.3 = 558.4 Loss of H-Val-Oxo-Pro-Sar-MeVal-OH + Loss of Pro- Sar-MeVal-OH  1269.7-739.3 = 530.3 Loss of H-Val-Oxo-Pro-Sar-MeVal-OH + Loss of Pro- Sar-MeVal-OH (-28)  1269.7-810.4 = 459.3 Loss of H-Val-Oxo-Pro-Sar-MeVal-OH + Loss of Val-Pro- Sar-MeVal-OH  1269.7-870.4 = 399.3 Loss of H-Val-Pro- Sar-MeVal-OH  1269.7-969.7 = 300.2 Loss of H-Pro- Sar-MeVal-OH  1269.7-1007.5 = 262.2 Loss of H-Pro- Val-Sar-OH  1269.7-1066.3 = 203.4 Loss of H-Sar-MeVal-OH  1269.7-1100.4 = 169.3 Loss of H-Pro-Sar-OH |

**Table S7b. Structural characterisation of Transitmycin (R1) obtained by QTRAP LCMS/MS**

| Product ions of [MS2] the [M+Na]+ ions of Transitmycin (R1) obtained by QTRAP LCMS/MS |
| --- |
| [MS2] of 1291.6]  1291.6 = [M+H]+  1291.6-113.1 = 1178.5 Loss of H-MeVal-OH  1291.6-226.1 = 1065.5 Loss of 2XH-MeVal­­­­  ­1291.6-297.4 = 994.2 Loss of Sar-2XH-MeVal-OH  1291.6-368.2 = 923.4 Loss of 2XSar-2XH-MeVal-OH  1291.6-440.3 = 851.3 Loss of 2XSar-2XH-MeVal-OH  1291.6-495.2 = 796.4 Loss of H-Thr-Val-Oxo-Pro-Sar-MeVal-OH  1291.6- 608.4 = 683.2 Loss of H-Thr-Val-Oxo-Pro-Sar-MeVal-OH + Loss of H-MeVal-OH  1291.6- 634.1 = 657.5 Loss of H-Val-Pro- Sar-MeVal-OH + Loss of H-Pro- Sar-MeVal-OH  1291.6-652.2 = 639.4 Loss of H-Val-Pro- Sar-MeVal-OH + Loss of H-Pro- Sar-MeVal-OH (18)  1291.6-772.7 = 518.3 Loss of H`-Val-OXO-Pro-Sar-MeVal-OH + Loss of H-Val-Pro- Sar-MeVal-OH  1291.6-772.7 = 518.3 Loss of H`-Val-OXO-Pro-Sar-MeVal-OH + Loss of H-Val-Pro- Sar-MeVal-OH  1291.6-804.0 = 487.0 Loss of H-Val-OXO-Pro-Sar-MeVal-OH + Loss of H-Val-Pro- Sar-MeVal-OH (32)  1291.6-848.3 = 443.3 Loss of H-Val-OXO-Pro-Sar-MeVal-OH + Loss of H-Val-Pro- Sar-MeVal-OH (32)  1291.6-886.3 = 405.3 Loss of H-Val-OXO-Pro-Sar-MeVal-OH + Loss of H-Val-Pro- Sar-MeVal-OH  1291.6-957.2 = 334.4 Loss of H-Th-Val-Oxo-Pro-Sar-MeVal-OH + Loss of H-Th-Val-Pro- Sar-MeVal-OH |

The Transitmycin A (3.0 mg) dissolved in 6N HCl (1 mL) and heated at 110 0C for 24 h. The solvent was removed under reduced pressure, and the resulting material was subjected to further derivatization. The hydrolysate mixture (3.5 mg) or the amino acid standards (0.5 mg) were dissolved in 0.1 mL of water and treated with 0.2 mL of 1% 1-fluoro-2,4-dinitrophenyl-5-Lalaninamide (FDAA) in acetone and 0.04 mL of 1.0 M sodium bicarbonate. The vials were heated at 50 0C for 90 min, and the contents after cooling at room temperature were neutralized with 1 N HCl. After degassing, an aliquot of the FDAA derivative was diluted in MeOH and purified by chromatography using a RP C-18 column (250 X 4.6 mm) and a linear gradient of acetonitrile and water containing 0.05% trifluoroacetic acid from 20:80 to 50:50 in 20 min and then isocratic. The flow rate was 1 mL/min, and the absorbance detection was at 340 nm. The chromatogram was compared with those of amino acid standards treated in the same conditions. The above same procedure for other two compounds B and C were done.

Transitmycin (R1) (3.0 mg)

6N HCl (1mL) 110 0C 24 h

Hydrolyzed Residue was dissolved in 0.1 mL of distilled water

0.04 mL of 1.0 M sodium bicarbonate 0.2 mL of 1% 1-fluoro-2,4-dinitrophenyl-5- alaninamide (FDAA)

in acetone

10 mg/mL solution

Residue was neutralized with 1 N HCl

Residue was analyzed by, HPLC, LCMS, MALDI-TOF, ESI-MS

**Figure S116. Hydrolysis of Amino Acid Residue of Transitmycin (R1), R2, R3**

**Figure S117a. HPLC analysis of standard L-FDAA-D/L-Valine**

**(a)**

**D-Valine**

**L-Valine**

**Figure S117 b. HPLC analysis of standard L-FDAA-D-Valine**

**Figure S117c. HPLC analysis of standard L-FDAA-L-Valine**

**(c)**

**(b)**

**Standard L-FDAA-D-Valine**

**Standard L-FDAA-L-Valine**

**(a)**

**Figure S118 (a). HPLC analysis of standard L-FDAA-D/L-Proline**

**D-Proline**

**L-Proline**

**Figure S118 (b) HPLC analysis of standard L-FDAA-D-Proline**

**Figure S118c. HPLC analysis of standard L-FDAA-L-Proline**

**(b)**

**(c)**

**Standard L-FDAA-D-Proline**

**Standard L-FDAA-L-Proline**

**L-Proline**

**D-Proline**

**Figure S119a. HPLC analysis of standard L-FDAA-D/L-Threonine**

**L-Threonine**

**D-Threonine**

**Figure S119b. HPLC analysis of standard L-FDAA-D-Threonine**

**Figure S119c.HPLC analysis of standard L-FDAA-D-Threonine**

**Standard L-FDAA-D-Threonine**

**Standard L-FDAA-L-Threonine**

**D-Threonine**

**L-Threonine**

**Figure S120a.HPLC analysis of standard L-FDAA-D/L-N-Methyl Valine**

**(a)**

**D-Threonine**

**D-Threonine**

**Figure S120c.HPLC analysis of standard L-FDAA-D-N-Methyl Valine**

**Figure S120b. HPLC analysis of standard L-FDAA-D-N-Methyl Valine**

**(c)**

**(b)**

**Standard L-FDAA-D-N-Methyl Valine**

**Standard L-FDAA-D-N-Methyl Valine**

**L-N-Methyl Valine**

**D-N-Methyl Valine**

**(a)**

**(b)**

**Figure S121b. HPLC analysis of standard L-FDAA-L-Valine**

**Figure S121a.HPLC analysis of standard L-FDAA-D-Valine**

**Standard L-FDAA-L-Valine**

**Standard L-FDAA-D-Valine**

**Figure S121**C. **HPLC Analysis of L-FDAA Derivatives of acid hydrolysates of Transitmycin (R1)**

**(c)**

**L-Valine**

**Figure 122a.HPLC analysis of standard L-FDAA-D-Valine**

**Figure S122b. HPLC analysis of standard L-FDAA-L-Valine**

**(b)**

**(a)**

**Standard L-FDAA-D-Valine**

**Standard L-FDAA-L-Valine**

**Figure S122c. HPLC Analysis of L-FDAA Derivatives of acid hydrolysates of R2**

**(c)**

**L-Valine**

**Figure S123b.HPLC analysis of standard L-FDAA-L-Valine**

**Figure S123a. HPLC analysis of standard L-FDAA-D-Valine**

**(a)**

**(b)**

**Standard L-FDAA-D-Valine**

**Standard L-FDAA-L-Valine**

**Figure S123c. HPLC Analysis of L-FDAA Derivatives of acid hydrolysates of R3**

**(c)**

**L-Valine**

**Figure S124. HPLC Analysis of L-FDAA Derivatives of acid hydrolysates of (R2)**

**L-Proline**

**L-Threonine**

**D-Proline**

**L-Valine**

**N-Methyl-L-Valine**

**Figure S125. HPLC Analysis of L-FDAA Derivatives of acid hydrolysates of R3**

**D-Proline**

**L-Proline**

**L-Threonine**

**L-Valine**

**N-Methyl-L-Valine**

**Table 8a. Analysis of L-FDAA derivates of acid hydrolysate of R2 by HPLC**

| **Amino acids** | **HPLC retention times**  **Marfey’s derivatives of standard amino acids** | | **HPLC retention time**  **Marfey derivatives of acid hydrolysate of Transitmycin R2** | Assignment |
| --- | --- | --- | --- | --- |
| **D** | **L** |
| **Threonine** | **15.682** | **13.987** | **14.000** | **L** |
| **Proline** | **17.035** | **16.519** | **16.529 & 16.960** | **D & L** |
| **Valine** | **21.244** | **19.248** | **19.300** | **L** |
| **N-methyl valine** | **22.089** | **20.814** | **21.255** | **L** |

**Table 8b. Analysis of L-FDAA derivatives of acid hydrolysate of R3 by HPLC**

| **Amino acids** | **HPLC retention times**  **Marfey’s derivatives of standard amino acids** | | **HPLC retention time**  **Marfeyderivatives of acid hydrolysate of Transitmycin R3** | **Assignment** |
| --- | --- | --- | --- | --- |
| **D** | **L** |
| **Threonine** | **15.682** | **13.987** | **13.988** | **L** |
| **Proline** | **17.035** | **16.519** | **16.512 & 17.000** | **D & L** |
| **Valine** | **21.244** | **19.248** | **19.235** | **L** |
| **N-methyl valine** | **22.089** | **20.814** | **21.242** | **L** |

**Proline**

**Valine**

**Figure S126. ESI- MS Spectrum of Marfey’s Derivatives of Transitmycin (R1) (Positive mode)**

**Proline**

**Valine**

**Figure S127. ESI- MS Spectrum of Marfey’s Derivatives of Transitmycin (R1) (Positive mode)**

**Figure S128. LCMS analysis of Standard L-FDAA-D-Proline (Positive mode)**

**Figure S129. LCMS analysis of Standard L-FDAA-D-Proline (Negative mode)**

**Figure S130 LCMS analysis of Standard L-FDAA-L-Proline (Positive mode)**

**Figure S131. LCMS analysis of Standard L-FDAA-L-Proline (Negative mode)**

**Figure S132. LCMS analysis of Standard L-FDAA-D/L-Proline (Positive mode)**

**Figure S133. LCMS analysis of Standard L-FDAA-D/L-Proline (Negative mode)**

**Figure S134.. LCMS analysis of Standard L-FDAA-D-Valine (Positive mode)**

**Figure S135. LCMS analysis of Standard L-FDAA-D-Valine (Negative mode)**

**Figure S136. LCMS analysis of Standard L-FDAA-L-Valine (Positive mode)**

**Figure S137. LCMS analysis of Standard L-FDAA-L-Valine (Negative mode)**

**Figure S138. LCMS analysis of Standard L-FDAA-D/L-Valine (Positive mode)**

**Figure S139. LCMS analysis of Standard L-FDAA-D/L-Valine (Negative mode)**

**Figure S140. LCMS analysis of Standard L-FDAA-D/L-Valine (Positive mode)**

**Figure S141. LCMS analysis of Standard L-FDAA-D/L-Valine (Negative mode)**

**Figure 142. LCMS analysis of Standard L-FDAA-D-Threonine (Positive mode)**

**Figure S143. LCMS analysis of Standard L-FDAA-D-Threonine (Negative mode)**

**Figure S144. LCMS analysis of Standard L-FDAA-D/L Threonine (Positive mode)**

**Figure 145. LCMS analysis of Standard L-FDAA-D/L Threonine (Negative mode)**

**Figure S146. LCMS analysis of Standard L-FDAA-D/L N-Methyl valine (Positive mode)**

**Figure S147. LCMS analysis of Standard L-FDAA-D/L N-Methyl Valine (Positive mode)**

**Figure S148. LCMS analysis of Standard L-FDAA-L N-Methyl valine (Positive mode)**

**Figure S149. LCMS analysis of Standard L-FDAA-L- N-Methyl valine (Positive mode)**

**Figure S150. LCMS analysis of Standard L-FDAA-L N-Methyl Valine (Positive mode)**

**Figure S151. LCMS analysis of Standard L-FDAA-L N-Methyl Valine (Positive mode)**

**Figure S152. LCMS analysis of Standard L-FDAA-L N-Methyl Valine (Negative mode)**

**Figure S153. LCMS analysis of Standard L-FDAA-D/L N-Methyl Valine (Positive mode)**

**Figure S154. LCMS analysis of Standard L-FDAA-L N-Methyl Valine (Positive mode)**

**Figure S155. LCMS analysis of Standard L-FDAA-D/L N-Methyl Valine (Positive mode)**

**Figure S156. LCMS analysis of Standard L-FDAA-D/L N-Methyl Valine (Negative mode)**

**Figure S157. LCMS analysis of Standard L-FDAA-D/L N-Methyl Valine (Negative mode)**

**Figure S158. LCMS analysis of Standard L-FDAA-D/L N-Methyl Valine (Negative mode)**

**Figure S159. LCMS analysis of L-FDAA derivatives of Transitmycin (R1) ( Positive mode)**

**Figure S160. LCMS analysis of L-FDAA derivatives of R1 (Negative mode)**

**Figure S161. LCMS analysis of L-FDAA derivatives of R3 (Positive mode)**

**Table S9a. Analysis of L-FDAA derivates of acid hydrolysate of Transitmycin R2 by HPLCMS**

| Amino acids | LCMS retention times  Marfey’s derivatives of standard amino acids | | HPLC retention time  Marfey derivatives of acid hydrolysate of Transitmycin R1 | M+H]+  m/z | [M-H]-  m/z | Assignment |
| --- | --- | --- | --- | --- | --- | --- |
| D | L | Positive mode | Negative mode |
| Threonine | 9.90 | 13.50 | 13.73 | 372.13 | 370.13 | L |
| Proline | 15.16 | 14.31 | 14.23 &15.36 | 366.13 | 363.07 | D&L |
| **Valine** | **19.65** | **17.65** | **18.02** | **370.13** | **368.07** | **L** |
| N-methyl valine | 20.33 | 19.25 | 19.96 | 384.20 | 382.20 | L |

**Table S9b. Analysis of L-FDAA derivates of acid hydrolysate of R3 by HPLCMS**

| **Amino acids** | **LCMS retention times**  **Marfey’s derivatives of standard amino acids** | | **HPLC retention time**  **Marfey derivatives of acid hydrolysate of R3**  **minutes** | **[M+H]+**  **m/z** | **[M-H]-**  **m/z** | **Assignment** |
| --- | --- | --- | --- | --- | --- | --- |
| **D minutes** | **L minutes** | **Positive mode** | **Negative mode** |
| Threonine | 9.90 | 13.50 | 12.45 | 372.13 | 370.13 | L |
| Proline | 15.16 | 14.31 | 14.25 | 366.13 | 363.07 | D & L |
| **Valine** | **19.65** | **17.65** | **17.49** | **370.13** | **368.07** | **L** |
| **N-methyl valine** | **20.33** | **19.25** | **19.93** | **384.20** | **382.20** | **L** |

**Table S10. Physico-chemical properties of R2**

Colour: Red colour amorphous powder

Yield: 100 mg, 10%

m.p: 250-252oC

TLC: Rf = 0.6 (Ethyl acetate/Methanol, 95:5)

[α]D25: -24o (c = 0.2, MeOH)

Solubility: Soluble in Chloroform, Dichloromethane, Ethyl acetate, Methanol,Ethanol, Acetonitrile,

DMSO, water.Insoluble in Hexane.

UV: (MeOH) λ max, (log ε) 205, (1.25), 240 (0.63), 425 (0.39), 442 (0.42) nm

CD: [MeOH, [nm], (mdeg)]: λmax, (Δε) 195 (+8.8), 210 (-22.0), 240 (+4.3) nm

IR: (KBr), *ν*max= 3436, 2961, 2924, 2853, 1744, 1650, 1565, 1415, 1204, 1140, 1045, 1019 cm-1

HRESI-MS: *m/z*(pos.ions) 650.3413 [M+2H]+2, 1277.8245 [M + Na]+ 1293.8735 [M + K]+

C62H86N12O16Na [M + Na]+ calc. 1277.61824, found. 1277.8245

MALDI-TOF-MS: *m/z* (pos.ions) 1279.94914 [M + Na+2H]+ *m/z* (neg.ions) 1255.38052[M-H]- [M + Na+2H]+ calc. 1279.63424, found. 1279.94914

LCESI-MS: *m/z* (pos.ions) 1277.8245 [M + Na]+ C62H86N12O16Na [M + Na] + calc. 1277.61824, found. 1277.8245

EI-MS: (70 ev) *m/z* (pos.ions: 739.9827, 616.9573, 547.2778, 434.2708, 391.5160, 200.1560, 146.7755,

11.2256

CHN: Anal. calcd for C62H86N12O16:C, 59.32; H, 6.90; N, 13.39.

Found: C, 61.05; H, 7.25; N, 11.32.

**Table S11. Physico-chemical properties of R3**

Colour: Orange colour amorphous powder (50 mg)

Yield: 50 mg, 5%

m.p: 220-222oC

Rf: 0.3 (Ethyl acetate-Methanol 95:5)

Solubility: Soluble in Chloroform, Dichloromethane, Ethyl acetateMethanol, Ethanol, Acetonitrile,

DMSO, water. Insoluble in Hexane

[α]D25: -27 o (c = 0.2, MeOH)

UV (MeOH) λ ma x(log ε) 206 (1.90), 240 (0.69) 424 (0.191), 442.2 (0.19) nm

CD: [MeOH,[nm], (mdeg) ]λmax(Δε) 195 (+24.0), 210 (-21.5), 241 (+1.7)

IR:(KBr),*ν*max 3415, 2957, 2924, 2853, 1745, 1642, 1583, 1464, 1384, 1193, 1093, 1078 cm-1.

HRESI-MS: *m/ z* (pos.ions) 663.4698 [M+2H]+2, 1271.7159 [M + H]+

C62H86N12O17 [M + H]+ calc. 1277.6312, found. 1271.7159

MALDI-TOF-MS: *m/z* (pos.ions) 1292.24097 [M + Na]+ *m/z*(neg.ions) 1268.48582[M-H]-

C62H86N12O17Na [M + Na]+ calc. 1293.61316 found. 1292.24097

LCESI-MS: *m/z* (pos.ions) 1277.6149 [M-OH+Na+H]+ C62H85N12O16 [M – OH+Na+H] + calc. 1277.61416, found. 1277.6149

EI-MS: (70 ev) *m/z* (pos.ions): 98, 956.7713, 900, 9470, 859.8045, 771.227, 708.0386, 562.4686,

515.1946, 446.3967, 351.8868, 1\230.2476, 94.2476

CHN: Anal. calcd for C62H86N12O17:C, 58.57; H, 6.82; N, 13.22.

Found: C, 58.75; H, 7.13; N, 11.59.

Supplementary Table 12: Drug resistant profile of the clinical isolates of *Mycobacterium tuberculosis* used to determine the anti TB activity of Transitmycin. R: Resistant; S: Susceptible. The drug resistant profile was determined by LJ based Proportion sensitivity method.

| **Culture No.** | **Isoniazid** | **Rifampicin** | **Kanamycin** | **Ofloxacin** |
| --- | --- | --- | --- | --- |
| 1-49 | S | S | S | S |
| 50 | R | S | S | S |
| 51 | R | S | S | S |
| 52 | S | R | S | S |
| 53 | R | S | S | S |
| 54 | S | S | S | R |
| 55 | R | S | S | S |
| 56 | R | S | S | R |
| 57 | R | S | S | S |
| 58 | R | S | S | S |
| 59 | R | S | R | R |
| 60 | R | R | R | S |
| 61 | S | S | R | S |
| 62 | R | S | S | R |
| 63 | R | S | S | R |
| 64 | R | S | R | R |
| 65 | R | S | S | S |
| 66 | R | S | S | R |
| 67 | R | S | S | R |
| 68 | R | S | R | R |
| 69 | S | S | S | R |
| 70 | S | S | S | R |
| 71 | R | S | S | S |
| 72 | R | S | S | R |
| 73 | R | R | S | S |
| 74 | R | S | S | S |
| 75 | R | R | S | S |
| 76 | R | R | R | S |
| 77 | R | R | S | R |
| 78 | R | R | S | R |
| 79 | R | S | S | S |
| 80 | R | S | S | R |
| 81 | R | S | S | S |
| 82 | R | R | S | S |
| 83 | R | R | S | S |
| 84 | R | R | S | R |
| 85 | R | R | S | S |
| 86 | R | R | S | R |
| 87 | S | R | S | R |
| 88 | R | R | S | S |
| 89 | R | R | S | S |
| 90 | S | R | S | R |
| 91 | S | S | S | R |
| 92 | R | R | S | S |
| 93 | R | R | S | R |
| 94 | S | R | S | R |
| 95 | R | S | S | R |
| 96 | R | R | S | S |
| 97 | R | S | S | R |

**S - Table 13. Anti-HIV activity of Transitmycin on various HIV-1 subtypes**

| **HIV-1 subtype** | **IC50 values at various concentration of Transitmycin**  **(in µg/mL)** | | | | | **EC50 Value (µM)** |
| --- | --- | --- | --- | --- | --- | --- |
| **0** | **0.01** | **0.1** | **1** | **10** |
| **SUB A** | 4624.7 ± 348.34 | 2600.31 ± 212.27 | 1413±84.36 | 116.00 ± 13.61 | 133.32 ± 13.33 | 0.263 |
| **SUB B** | 9123.78 ± 495.29 | 8419.48 ± 549.73 | 7470.78 ± 3208.54 | 4222.52 ± 138.79 | 1693.95±35.38 | 2.347 |
| **SUB C** | 11652.5 ± 1339.97 | 10962.821± 729.96 | 11005.35±144.9 | 3435.69 ± 75.80 | 578.46 ± 65.77 | 2.167 |
| **SUB D** | 10170.22 ± 1572 | 10761.7 ± 576.85 | 7405.783±303.46 | 1339.49±287.06 | 306.53± 27.43 | 0.447 |
| **SUB E** | 3976.34 ± 68.35 | 3726.96±590.53 | 2120.49±155.83 | 970.25 ±38.08 | 258.84 ± 3.87 | 0.78 |
| **SUB A/C** | 5871.52 ± 51.10 | 5562.45±396.06 | 4654.15 ±262.26 | 589.52 ± 133.80 | 154.45 ±30.20 | 0.685 |
| **NEV RES** | 3325.76 ± 259.01 | 3636.10 ±743.95 | 3278.46 ±329.16 | 627.37 ±69.58 | 341.00 ±7.88 | 0.771 |
| **AZT RES** | 3031.83 ± 821.87 | 3040.03±703.81 | 2213.102± 48.17 | 1066.38 ± 17.34 | 786.32 ±37.46 | 0.388 |

**Acknowledgements for Characterisation of Transitmycin**

The Chairman, NMR Research Centre, IISC, Bangalore

Dr.A.Mohan, Mr.Venkatesan, Department of Chemistry, IIT Madras

Dr.M.S.Moni, Dr.C. Baby, Mr. R. Bhaskar, SAIF IIT Madras for 2D NMR analysis

Prof. T. Pradeep, AnanyaBaksi, DST Unit of Nano science IIT Madras for QTRAP LC/MS/MS

Prof. T. Pradeep, Mr.Kamalesh, Mr. E. Sundaraj, DST Unit of Nano Science IIT Madras for MALDI-TOF

Mrs.Sunita Prakash, Molecular Biophysics Department, IISC Bangalore for ESI-MS/MS, MALDI TOF-MS/MS

Mrs.Santha, Mr.Thankarasu, Department of Chemistry IIT Madras for Q-TOF-ESI-MS

Mr. Sankar, SAIF, IIT Madras for IR, EI-MS

The Head, SAIF CDRI, Luknow for LC-ESI-MS

Mr.Muralidhar, SID IISC Bangalore LC-ESI-MS

Prof.Anju Chanda, Mr. T.Saravanan, Department of Biotech IIT Madras for Optical Rotation measurement

Mrs.S.Srividya, Department of Chemistry, IIT Madras.

Dr. P.M.Sivakumar, Department of Biotechnology, Indian Institute of Technology Madras, Chennai, Tamilnadu , 600036, India

Dr. Veluchamy Prabhawathi Department of Biotechnology, Indian Institute of Technology Madras, Chennai, Tamilnadu, 600036, India

**Supplementary References:**

1. Xiaoling Wang, Jioji Tabudravu Mostafa Ezzat Rateb, Krystal Joan Annand, Zhiwei Qin, Marcel Jaspars, Zixin Deng, Yi Yband Hai Deng, Identification and characterization of the actinomycin G gene cluster in Streptomyces iakyrus, *Mol. BioSyst.,* **9,** 1286—1289. (2013).
2. Rebecca H. Wills, Peter B. O’Connor Structural Characterization of Actinomycin D Using Multiple Ion Isolation and Electron Induced Dissociation J. Am. Soc. Mass Spectrom. **25**:186Y19, (2014).
3. IvanaCrnovci c, Siamak Semsary, Joachim Vater and Ullrich Keller, Biosynthetic rivalry of o-aminophenol-carboxylic acids initiates production of hemi-actinomycins in Streptomyces antibioticus, RSC Adv., **4**, 5065 (2014).
4. JoachimVater, Ivana Crnovčić, Siamak Semsary and Ullrich Keller MALDI-TOF mass spectrometry, an efficient technique for in situ detection and characterization of actinomycins,J. Mass Spectrom., **49**, 210–222 (2014).
5. Collisional Activation Decomposition of Actinomycins Using Tandem Mass Spectrometry J. Roboz, E. Nieves and J. F. Holland M. McCamish, C. Smith, BIOMEDICAL AND ENVIRONMENTAL MASS SPECTROMETRY, **VOL. 16**, 67-70 (1988**).**
6. A. B. Mauger, W. A. Thomas, NMR Studies of Actinomycins Varying at the Proline Sites, ORGANIC MAGNETIC RESONANCE, **VOL. 17,** NO. 3(1981).
7. Darren Thomas, Michael Morris,Jonathan M. Curtis and Robert K. Boyd, Fragmentation Mechanisms of Protonated Actinomycins and Their Use in Structural Determination of Unknown Analogues, JOURNAL OF MASS SPECTROMETRY, **VOL. 30**, 1111-1125 (1995).
8. Jens Bitzer, Martin Streibel, Hans-Jörg Langer, Stephanie Grond, First Y-Type Actinomycins from *Streptomyces*with Divergent Structure-Activity Relationships for Antibacterial and Cytotoxic Properties, *Org. Biomol. Chem., 7, 444–450.* (2009).
9. Caixia Chen,Fuhang Song, QianWang,Wael M. Abdel-Mageed, HuiGuo, Chengzhang Fu &WeiyuanHou & Huanqin Dai & Xueting Liu & Na Yang & FengXie & Ke Yu & Ruxian Chen & Lixin Zhang, A marine-derived Streptomyces sp. MS449 produces high yield of actinomycin X2 and actinomycin D with potent anti-tuberculosis activity, Appl Microbiol Biotechnol **95**:919–927, (2012).
10. Shigehiro Kamitori and FusaoTakusagawa’ Multiple Binding Modes of Anticancer Drug Actinomycin D:X-ray, Molecular Modeling, and Spectroscopic Studies of d (GAAGCTTC)2-Actinomycin D Complexes and Its HostDNA, *J. Am. Chem. SOC.*,**116**, 41544165, (1994).
11. JensBitzer, Victoria Gesheva, and Axel Zeeck, Actinomycins with Altered Threonine Units in the *â*-Peptidolactone, *J. Nat. Prod.*, ***69****,* 1153-1157, (2006).
12. Xiufang Zhang , Xuewei Ye, Weiyun Chai , Xiao-Yuan Lian, and Zhizhen Zhang, New Metabolites and Bioactive Actinomycins from Marine-Derived Streptomyces sp. ZZ338, Mar. Drugs, **14,** 181, (2016).
13. Helmut Lackner, Isabel Bahner, Nobuharu Shigematsu Lewis K. Pannell, and Anthony B. Mauger, Structures of Five Components of the Actinomycin Z Complex from *Streptomyces fradiae*, Two of Which Contain 4-Chlorothreonine, *J. Nat. Prod*, *63,* 352-356, *(* 2000).
14. . F. Conti, P. DeSantis Conformation of Acitinomycin D Nature, Vol. **227**, 19, (1970).
